# Supplementary material for: Exome-chip meta-analysis identifies novel loci associated with cardiac conduction, including ADAMTS6
Source: Genome Biol. 2018 Jul 17;19:87. doi: 10.1186/s13059-018-1457-6 (PMC6048820; doi:10.1186/s13059-018-1457-6)
Supplement: Supplementary file 1 — Table S1. Cohort characteristics. Table S2. Single SNP meta-analyses. Table S3. Sex-stratified analyses. Table S4. SKAT analyses. Table S5. T1-burden analyses. Table S6. ADAMTS6 variant details. Table S7. Cardiac phenotype distribution in Adamts6 mutant mice. (XLSX 475 kb) [file 13059_2018_1457_MOESM1_ESM.xlsx]

## Sheet: Index
	Supplemental table	Content name	Content	Content details
	S1	Cohort characteristics	Per cohort information regarding sample characteristics, genotyping and analysis details	General study information, ECG measurement summary statistics, participant selection and exclusion, genotyping quality control and SNP filtering, data analysis.
	S2	Single SNP meta-analyses	Single point analyses for African American (AA), European (EA) and combined (Combined) ancestry	Locus # = locus number, chr=chromosome, position = NCBI build 37 (hg19) position, A1 = coded allele, A2 = non-coded allele, band=cytoband, index SNP = lead SNP name of variant on exome chip, dbSNPID = dbSNP name of index SNP, variant function = function of variant within gene, gene = name of gene that index SNP resides in, caf=coded effect allele frequency, maf = minor allele frequency, beta=effe…
	S3	Sex-differentiated meta-analyses	Single point, gender differentiated analyses for females and males, European (EA) and African American ancestry combined	Locus # = locus number, chr=chromosome, position = NCBI build 37 (hg19) position, band=cytoband, snp= SNP name of locus on exome chip, dbSNPID = dbSNP name of index SNP, variant function = function of variant within gene, gene = name of gene that index SNP resides in, A1 = coded allele, A2 = non-coded allele, beta=effect size (ms), se= standard error of effect size, p = p-value, caf=coded effect …
	S4	SKAT gene-based analyses	SKAT gene-based analyses, for 3 variant function categories	SKAT tests in the combined ancestry panel (EA + AA), for 3 different variant sets : (i) all variants within a gene,(ii) nonsynonymous and splice variants only, and (iii) damaging variants only. MAF range= range of MAFs of variants included in the test. gene= gene name in which variants were collapsed, p = pvalue for the SKAT test, Qmeta = , cmaf= cumulative allele frequency of variants included i…
	S5	T1 burden analyses	T1 burden gene-based analyses, for 3 variant function categories	T1 burden tests in the combined ancestry panel (EA + AA), for 3 different variant sets : (i) all variants within a gene,(ii) nonsynonymous and splice variants only, and (iii) damaging variants only. MAF range= range of MAFs of variants included in the test. gene= gene name in which variants were collapsed, beta=effect size (ms), se= standard error of effect size, p = pvalue for the T1 burden test…
	S6	ADAMTS6 variant details	Details of variants analysed in the ADAMTS6 gene, both in single variant analyses and in collapsed rare variant tests.	SKATgene =name of gene that index SNP resides in, Name = name of variant on exome chip, SNP = dbSNP name of variant, Position = NCBI build 37 (hg19) position, Allele 1 = coded allele, Allele 2 = non-coded allele, beta=effect size (ms), se= standard error of effect size, maf = minor allele frequency, caf=coded effect allele frequency, , p = p-value, ntotal = total number of individuals included in…
	S7	ADAMTS6 mutant mice phenotypes	Cardiac phenotype distribution in Adamts6 mutant mice.	Phenotype summary from analysis of 41 Adamts6 p.Ser149Arg embryos from 14.5 days of gestation to birth. DORV: double outlet right ventricle; PTA: persistent truncus arteriosus; PA: pulmonary artery.

## Sheet: 1. Cohort characteristics
	Table S1: Cohort characteristics
	Study characteristics and analysis details and methods for CHARGE-EKG QRS Exome			Discovery																									Replication
				AGES	ARIC	ARIC	BRIGHT	CHS	CHS	ERF	FHS	GS	GOCHA	GRAPHIC	INTER99	JHS	KORAS4	KORCULA	Lifelines	NEO	MGH-CAMP	RS	SHIP	TwinsUK	UHP	WHI	WHI	YFS	UKBB	deCODE
			Ancestry	EA	AA	EA	EA	AA	EA	EA	EA	EA	EA	EA	EA	AA	EA	EA	EA	EA	EA	EA	EA	EA	EA	AA	EA	EA	EA	EA
		Item	Description
	STUDY INFORMATION	1	Cohort name	Age, Gene/Environment Susceptibility-Reykjavik Study (AGES-Reykjavik)	The Atherosclerosis Risk in Communities Study	The Atherosclerosis Risk in Communities Study	British Genetics of Hypertension	Cardiovascular Health Study	Cardiovascular Health Study	Erasmus Rucphen Family Study	Framingham Heart Study	Generation Scotland Scottish Family Health Study	Genetics of Cerebral Hemorrhage with Anticoagulation	The Genetic Regulation of Arterial Pressure of Humans in the Community	Inter99	The Jackson Heart Study	Kooperative Gesundheitsforschung in der Region Augsburg	CROATIA-Korcula	The Lifelines Cohort Study	The Netherlands Epidemiology of Obesity Study	Massachusetts General Hospital Cardiology and Metabolic Cohort (CAMP)	Rotterdam Study 1	SHIP-0 / SHIP-Trend	TwinsUK	Utrecht Health Project	Women's Health Initiative	Women's Health Initiative	The Young Finns Study	UK Biobank	deCODE
		2	Cohort Abbreviation	AGES	ARIC	ARIC	BRIGHT	CHS	CHS	ERF	FHS	Generation Scotland	GOCHA	GRAPHIC	Inter99	JHS	KORA	Korcula	Lifelines	NEO	MGH	RS-1	SHIP-0 / SHIP-Trend	TwinsUK	UHP	WHI	WHI	YFS	UKBB	deCODE
		3	Cohort website	-	www.cscc.unc.edu/aric/	www.cscc.unc.edu/aric/	www.brightstudy.ac.uk/	chs-nhlbi.org	chs-nhlbi.org	www.epib.nl/research/erf/erf_index.html	www.framinghamheartstudy.org/	www.generationscotland.org/	www.ncbi.nlm.nih.gov/projects/gap/cgi-bin/study.cgi?study_id=phs000416.v1.p1	-	www.inter99.dk/	www.jacksonheartstudy.org/	www.helmholtz-muenchen.de/kora	www.hgu.mrc.ac.uk/people/a.wright_research_qtl.html	www.lifelines.nl	www.lumc.nl/org/klinische-epidemiologie/research/85843/90302015043229/	'-	www.ergo-onderzoek.nl/wp/, www.epib.nl/research/ergo.htm	www.medizin.uni-greifswald.de/cm/fv/english/ship_en.html	www.twinsuk.ac.uk/	www.lrgp.nl	www.whi.org	www.whi.org	youngfinnsstudy.utu.fi	www.ukbiobank.ac.uk	ww.decode.com
		4	Reference study description (PMID)	17351290	2646917	2646917	12826435	1669507	1669507	15845033	24084292	22786799	19150865	18443236	14663300	16320381	16032513, 16032514	19260141	25502107	23576214	25812009	22002080	11565448, 12795357, 20167617	12537873, 17254428, 23088889	15921047	-	-	18263651	25826379	20062063, 29050564
		5	Ethnicity	European	African American	European	European	African American	European	European	European	European	European	European	European	African American	European	European	European	European	European	European	European	European	European	African American	European	European	European	European, Icelandic
		6	Country	Iceland	USA	USA	United Kingdom	USA	USA	The Netherlands	USA	Scotland	United States	UK	Denmark	USA	Germany	Croatia	The Netherlands	The Netherlands	United States	The Netherlands	Germany	United Kingdom	The Netherlands	United States	United States	Finland	United Kingdom	Iceland
		7	Study design	Population-based	Population-based prospective cohort study	Population-based prospective cohort study	Hypertensive Cases	Population-based cohort	Population-based cohort	Population-based family study	Population-based cohort	Population-based cohort	Population-based cohort	Population-based cohort	Population-based cohort	Mixed family and population-based	Population-based cohort	Population-based cohort but contains families	Population-based but contains families	Population-based cohort	Cross sectional observational study	Population-based cohort	Population-based cohort	Population-based cohort / Twins	Population-based cohort	Population-based cohort	Population-based cohort	Population-based cohort	Population-based cohort	Population-based cohort
	ECG MEASUREMENTS	8	ECG assaying centre	Iceleandis Heart Association, Holtasmari 1, Kopavogur, Iceland	EPICORE Center (University of Alberta)	EPICORE Center (University of Alberta)	West of Scotland Primary Prevention Centre ,University of Glasgow, Scotland	EPICARE Center (Wake Forest University, Winston-Salem, North Carolina)	EPICARE Center (Wake Forest University, Winston-Salem, North Carolina).	Erasmus University Medical Centre, Rotterdam, the Netherlands	the Framingham Heart Study	BHF Clinical Research Centre, Glasgow; Tennents CRC, Glasgow; Dundee CRC; Perth Royal Infirmary; Dundee Diabetes Clinic; Institure for Cardiovascular Research, Dundee; Aberdeen Royal Infirmary; Irvine Central Hospital; Alyth Health Centre;	Massachusetts General Hospital, Boston, USA	ECG Core Laboratory at the University of Glasgow, UK. Digital ECG data were transferred to the University of Glasgow ECG Core Lab at Glasgow Royal Infirmary and analyzed by the University of Glasgow ECG analysis program	Research Center for Prevention and Health, Glostrup University Hospital, Glostrup, Denmark	University of Mississippi Medical Center, Jackson, MS, USA	University Hospital Munich, Department of Medicine I, Munich, Germany	-	LifeLines facility at University Medical Center, Groningen	Leiden University Medical Center, Leiden, the Netherlands	Massachusetts General Hospital, Cardiovascular Research Center, Boston, MA	Erasmus medical centre, Rotterdam; software: MEANS	SHIP Examination centre, University Medicine Greifswald, Greifswald, Germany	Cardiogenetics Lab, St Georges Hospital, London, UK	-	Epicare, Wake Forest University	Epicare, Wake Forest University	National Institute for Health and Welfare, Turku, Finland	UK Biobank Assessment Centre	Landspital, The National University Hospital, in Reykjavik
		9	Instrument type I (Manufacturer, model)	Marquette / MAC 5000 Resting ECG (GE Medical System s,U.S.A. Software Version 006A, PN 2000657-033, Revision A)	MAC PC ECG machines (Marquette Electronics)	MAC PC ECG machines (Marquette Electronics)	Twelve-lead ECG recordings (Siemens-Sicard 440	GE Marquette 12 SL (GE Marquette, Milwaukee, Wisconsin)	GE Marquette 12 SL (GE Marquette, Milwaukee, Wisconsin)	10 s 12-lead ECG with ACTA-ECG (Esaote, Florence, Italy) with a sampling frequency of 500 Hz	Paper ECGs were scanned and digital caliper measurements were made using proprietary software20. The QRS duration trait analyzed was the average of the lead-specific QRS duration (from QRS onset to QRS offset) in leads II, V2 and V5	Various	-	12 lead electrocardiograph (Burdick eclipse 850)	MUSE Cardiology Information System (GE Healthcare, Wauwatosa, Wisconsin) analysed by Marquette 12SL algorithm version 21	A supine 12-lead digital electrocardiogram	Digital 12-lead ECG, Hannover ECG System, HES	Mortara ELI 350	Standard 12-lead electrocardiograms were recorded with CardioPerfect equipment (Cardio Control; currently Welch Allyn, Delft, The Netherlands)	12-lead ECG was obtained using a Mortara Eli-350 electrocardiograph (Mortara Instrument Inc., Best, the Netherlands)	GE Mac 5000	EACTA, ASOTE, florence, italy	Esaote - Personal 120LD (1997 onward for SHIP-0)	12-lead ECG- Cardiofax GEM machine 9020K (1997 onward)	A 12-lead ECG was made at rest and digitally stored. QRS duration was calculated automatically	GEMSIT MACPC personal cardiograph	GEMSIT MACPC personal cardiograph	MAC® 5500 - GE Healthcare	CAM- USB 6.5 operated using Cardiosoft v6.51	12-lead ECG
		10	Instrument type II (Manufacturer, model) - in case of multiple instruments	-	-	-	-	-	-	-	-	-	-	-	-	Marquette MAC/PC digital ECG recorder	-	-	-	-	GE Marquette 5500	-	Welch Allyn - PC-Based Resting ECG (2008 onward for SHIP-Trend)	Phillips Page Writer Trim l Cardiograph ECG machine (2009 onward)	-	-	-	MAC™ 800 Resting ECG Analysis System - GE Healthcare	-	Philips PageWriter Trim III, PageWriter 200, Philips Page Writer 50 and Phillips Page Writer 70 cardiographs. Stored in the Philips TraceMasterVue ECG Management System
	PARTICIPANTS: SELECTION AND EXCLUSION	11	Inclusion/Exclusions criteria for participants (non-genetic)	Participants from cohort that had ECG measurements	All participants from cohort that had ECG measurements and Exome chip data available, all unrelated	All participants from cohort that had ECG measurements and Exome chip data available, all unrelated	All participants from BRIGHT with Exome data, ECG data, and available covariates, all unrelated	Participants with ECGs measured at baseline and appropriate consent	Participants with ECGs measured at baseline and appropriate consent	ECG, exome chip and covariate data available	All subjects attending the examination	All participants with ECG measurements	All unrelated participants from entire cohort that had ECG measurements and Exome chip data available	None	None	Randomly selected participants from entire cohort that had ECG measurements and Exome chip data available, all unrelated	Participants in 7-year follow-up and processed with Exome chip	All participants with ECG measurements	All participants with ECG measurements	Participants from entire cohort that had ECG measurements and Exome chip data available, all unrelated	Participants from entire cohort that had ECG measurements	Randomly selected participants from entire cohort that had ECG measurements and Exome chip data available, all unrelated	Randomly selected participants from entire cohort that had ECG measurements and Exome chip data available, all unrelated	Randomly selected participants from entire cohort that had ECG measurements and Exome chip data available, all unrelated	Individuals who had exome chip data and ECG measurements available	All subjects were part of the WHI Clinical Trials, with ECG measurements	All subjects were part of the WHI Clinical Trials, with ECG measurements	Participants that had ECG measurements and Exome chip data available, all unrelated	Participants invited for bicycle cardio testing	All participants with ECG data that was collected from LUH in Reykjavik and included all ECGs obtained and digitally stored from 1998 to 2015
		12	Initial number of subjects with exome data and ECG measurements initially included [N]	3030	3853	10895	1021	924	4925	1045	7358	9787	547	1818	6046	2301	2939	323	1948	6604	3322	3012	7603	512	2973	1744	14087	1863	69992	78878
		13	QRS > 120 (or left or right bundle branch block) [N]	-	108	299	51	81	394	56	36	183	94	108	88	77	70	0	43	282	293	278	422	12	86	43	444	17	6224	2248
		14	Atrial fibrillation on baseline EKG [N]	-	5	26	88	13	141	14	1	0	0	-	23	11	10	0	0	147	0	72	112	2	0	15	111	2	1078	9026 (at baseline or history of AF)
		15	Wolff–Parkinson–White syndrome (WPW) [N]	-	1	4	0	2	3	0	14	4	0	-	0	3	23	0	1	0	0	2	17	0	15	12	66	0	154	212
		16	Pacemaker [N]	-	0	0	0	12	60	0	2	0	0	-	0	5	5	0	1	32	0	20	49	0	0	12	65	0	7	Excluded from initial ECG set
		17	Class I and class III blocking medication (ATC code prefix C01B) [N]	-	94	201	0	26	170	4	0	3	0	-	0	0	3	1	1	21	76	37	34	0	3	3	48	1	144	NA
		18	History of Myocardial Infarction or Heart failure [N]	-	352	800	33	117	603	13	18	486	0	-	42	0	129	0	0	56	635	279	870	0	83	57	488	13	1282	11
		19	Other exclusions criterion - Missing BMI measurement	-	0	0	0	0	0	3	0	0	93	35 ; QRS axis outlier	0	0	73	0	0	0	Non-sinus rhythm (e.g., ectopic atrial focus, etc)	0	9	0	1089	0	3	0	-	2065 ; no available genotypes
		20	Other exclusions criterion - Missing Heigth measurement	-	0	0	0	0	0	0	0	0	0	-	0	0	0	0	0	0	0	0	6	0	0	5	43	0	-	ECG´s in sinus rhythm
		21	Total number of participants excluded from the analysis [N]	912	571	1286	175	334	1837	90	312	698	296	61	283	108	357	1	45	987	863	758	1519	43	1275	114	2151	32	18021	19
	PARTICIPANTS: INCLUDED IN ANALYSIS	22	Total number of participants (After exclusions) [N]	2118	3282	9609	846	590	3088	955	7046	9089	251	1757	5763	2193	2582	322	1903	5617	2459	2254	6314	469	1698	1630	11936	1831	51971	59903
		23	Percentage of female participants (%)	63.3	62.31	54.39	62	59.5	62.7	55.6	54.94	58.96	54.2	50.2	51.6	62.7	52.9	61.8	60	53.7	44.3	44.3	53.18	100	55.1	100	100	55.7	44	53.5
		24	QRS duration (ms) [Mean (SD) / Median / Min - Max]	90.33 (10.58) / 90 / 60 - 120	89.74 (9.454) / 88 / 64 - 118	91 (9.401) / 90 / 60 - 118	93.36 (9.60) / 92.00 / 66.00 - 120.00	87.57 ( 10.48 )/ 88 / 64-120	88.44 ( 10.38 )/ 88/80-120	97.4 (10.3) / 98 / 70 - 120	87.20 (8.93) / 86.50/ 59.25 - 119.50	89.44 (9.77) / 88 / 46 - 120	88.32 (10.95) / 88 / 64-120	90.8 (9.4) / 90 / 66-120	91.13 (9.88) / 90.00 / 64-120	92.16 (10.01) / 90.00 /64 - 120	91.77 (9.17) / 92.00 / 64 - 120	96.1 (9.29) / 96 / 76 - 119	92.64 (10.90) / 91 / 60 - 120	92.82 (9.57) / 92.00 / 48-120	88.61 (10.52) / 88.00 / 56-118	96.9/98/68-120	96.34 (10.74) / 96.00 / 60 - 120	88.07 (8.57) / 88.00 / 66 - 118	95.58 (10.41) / 96 / 68-120)	85.02 (8.86)/84.00/58-120	86.1 (8.6)/86.0/56-120	90.61 (10.02) / 90 / 58 - 120	92.26(13.79) / 92.00 / 50.5 – 120	91.46 (9.72) / 91.00 / 48-119
		25	Age (years) [Mean (SD) / Median / Min - Max]	75.96 (5.37) / 75 / 66 - 94	53.23 (5.791) / 53 / 44 - 66	54.07 (5.673) / 54 / 44 - 66	57.64 (10.76) / 59.00 / 22.00 - 85.00	72.6 ( 5.63 )/71/65-93	72.36 ( 5.41 )/71/65-100	47.9 (14.3) / 47.7 / 16.7 - 85.3	39.31 (9.86) / 39.00 / 19-72	51.83 (13.55) / 54 / 18 - 99	73.2 (8.3) / 73.65 / 48 -100	39.3 (14.5) / 44 / 18-61	46.11 (7.89) / 45.10 / 29.7-61.3	52.65 (12.57) / 52.00 / 21-91	48.3 (13.03) / 48.00 / 25 - 74	54.34 (13.48) / 55 / 18 - 88	45.10 (13.04) / 45 / 9 - 87	55.8 (5.95) / 56.0 / 44-66	60.81 (11.61) / 63.00/ 31-81	68.1/68/55-101	48.76 (15.19) / 49.00 / 20 - 83	52.11 (11.65) / 53.00 / 18 - 83	38.01 (11.92) / 35 / 18-91	64.56 (6.43)/65/50-79	65.99 (6.66)/67.00/50-81	41.92 (4.98) / 43 / 34 - 49	57.62 (7.97) / 59 / 40-73	53.68 (19.42) / 55.15 / 1-102
		26	BMI (kg/m2) [Mean (SD) / Median / Min - Max]	27.09 (4.47) / 26.67 / 15.43 - 48.47	29.41 (6.067) / 28.56 / 14.2 - 65.91	26.84 (4.752) / 26.13 / 14.38 - 56.26	27.48 (3.83) / 27.00 / 17.00 - 44.00	28.52 ( 5.56 ) / 27.82/16.12-58.79	26.27 ( 4.45 )/25.77/14.65-48.33	26.8 (4.6) / 26.3 / 17.4 - 61.8	26.09 (4.98) / 25.28 / 15.31 - 60.52	26.94 (5.16) / 26.19 / 14.35 - 71.35	26.1 (4.6) / 25.84 / 12.89-47.25	26.1 (4.6) / 25.4 / 45.1 - 48.0	26.28 (4.65) / 25.59 / 15.24-56.90	31.33 (6.45) / 30.47 /16.02 - 91.80	26.92 (4.41) / 26.38 / 15.84 - 54.94	28.03 (4.25) / 27.75 / 18.37 - 53.84	25.87 (4.56) / 25.25 / 15.80 - 51.38	29.96 (4.81) / 29.48 / 17.47 - 61.18	28.49 (5.82)/27.5/15.5-59.7	26.2/25.8/14.3-49.0	27.44 (5.02) / 26.84 / 15.60 - 58,43	26.69 (5.33) / 25.42 / 17.59 - 46.05	25.23 (4.07) / 24.7 / 16.1-48.6	31.12 (5.86)/30.47/16.99-54.13	28.65 (5.62)/27.81/13.83-72.54	26.44 (4.96) / 25.70 / 16.21 - 58.47	27.39 (4.62) / 26.72 15.43 – 66.17	-
		27	Height (cm) [Mean (SD) / Median / Min - Max]	166.32 (9.07) / 165.3 / 143.15 - 196.4	168 (8.894) / 167 / 125 - 197	168.5 (9.409) / 168 / 137 - 199	165.8 (8.94) / 165.0 / 139.0 - 193.0	164.35 ( 9.13 )/163/145-196	164.26 ( 9.39 )/163.5/124-191.8	167.6 (9.5) / 166.8 / 139.3 - 195	66.50 (3.76) /66.25 / 48 - 78.75	167.6 (9.55) / 167 / 125.5 - 202.5	168.5 (10.5) / 167.64 / 135-198	170.9 (9.5) / 171 / 143-200	172.14 (9.14) / 172.00 / 129-207	169.33 (9.33) / 169.00 / 142 - 200	168.3 (9.33) / 168.1 / 139.2 - 196	168.3 (8.91) / 167.8 / 146.5 - 195.0	174.62 (9.30) / 174 / 148 - 208	173.4 (9.56) / 173.0/ 147 - 208	171.33 (10.16)/172.72/122-211	167.6/167/137-198	169.65 (9.39) / 170.00 / 137 - 203	163.31 (6.97) / 163.00 / 144 - 187	172.11 (10.31) / 172 / 123.3-202.4	161.8 (6.71)/161.9/101.2-194.1	161.6 (6.29)/161.5/98.6-193.7	172.07 (9.26) / 171.00 / 148.00 - 203.00	168.2 (9.17) / 168 / 122-204	-
	GENOTYPING	28	Genotyping centre	The University of Texas Health Science Center at Houston	CHARGE	CHARGE	Unknown	CHARGE	CHARGE	Human Genomics Facility (HuGeF), Erasmus MC, Rotterdam, NL	Cedars-Sinai Medical Center	Wellcome Trust Clinical Research Facility, Edinburgh, UK	Broad Institute, Cambridge, USA	Wellcome Trust Sanger Institute, Hinxton, UK	The Novo Nordisk Foundation Center for Basic Metabolic Research, University of Copenhagen, Denmark	Broad Institute	Genome Analysis Centre	Wellcome Trust Clinical Research Facility, Edinburgh, UK	Lifelines	Centre national de Génotypage, Paris, France	Unknown	CHARGE	Helmholtz Zentrum, München, Germany	Wellcome Trust Sanger Institute, Hinxton, UK	Erasmus MC, Rotterdam, Netherlands	Broad Institute, TGEN, University of Washington	Broad Institute, TGEN, University of Washington	Helmholtz Zentrum München, München, Bavaria, Germany	Affymetrix Research Services Laboratory in Santa Clara, California, USA	deCODE genetics, Iceland
		29	Genotyping Platform (including version)	Illumina Human Exome BeadChip v1.0	Illumina Human Exome BeadChip v1.0	Illumina Human Exome BeadChip v1.0	Illumina Human Exome BeadChip v1.0	Illumina Human Exome BeadChip v1.0	Illumina Human Exome BeadChip v1.0	Illumina Human Exome BeadChip v1.1	Illumina Human Exome BeadChip v1.0	Illumina ExomeChip V1.0	Illumina Human Exome BeadChip v1.0	Illumina Human Exome BeadChip v1.0	Illumina Human Exome BeadChip v1.0	Illumina Human Exome BeadChip v1.0	Illumina Human Exome BeadChip v1.0	Illumina Exome Chip v1.0	Illumina Exome Chip v1.1	Illumina HumanCoreExome 24V1-0_A	Infinium HumanCoreExome-24 BeadChips	Illumina Human Exome BeadChip v1.0	Illumina Human Exome BeadChip v1.0	Illumina Human Exome BeadChip v1.0	Illumina Human Exome BeadChip v1.1	Illumina Human Exome BeadChip v1.0	Illumina Human Exome BeadChip v1.0	Illumina HumanCoreExome-12 BeadChip v1.0	Affymetrix UK BiLEVE Axiom array, Affymetrix UK Biobank Axiom® array	Illumina HumanHap300, HumanCNV370, HumanHap610, HumanHap1M, HumanHap660, Omni-1, Omni 2.5 or Omni Express bead chips
		30	Genotyping calling algorithm	Jointly called with CHARGE cohorts (PMID: 23874508), GenomeStudio cluster files provided by CHARGE using GenCall	Jointly called with CHARGE cohorts (PMID: 23874508), GenomeStudio cluster files provided by CHARGE using GenCall	Jointly called with CHARGE cohorts (PMID: 23874508), GenomeStudio cluster files provided by CHARGE using GenCall	GenCall	Jointly called with CHARGE cohorts (PMID: 23874508), GenomeStudio cluster files provided by CHARGE using GenCall	Jointly called with CHARGE cohorts (PMID: 23874508), GenomeStudio cluster files provided by CHARGE using GenCall	zCall	Jointly called with CHARGE cohorts (PMID: 23874508), GenomeStudio cluster files provided by CHARGE using GenCall	Jointly called with CHARGE cohorts (PMID: 23874508), GenomeStudio cluster files provided by CHARGE using GenCall	zCall	GenCall + zCall	GenCall	Jointly called with CHARGE cohorts (PMID: 23874508), GenomeStudio cluster files provided by CHARGE using GenCall	GenCall	Used GenomeStudio cluster files provided by CHARGE using GenCall	GenCall + zCall	GenCall	GenCall+zCall	Jointly called with CHARGE cohorts (PMID: 23874508), GenomeStudio cluster files provided by CHARGE using GenCall	GenCall + zCall	GenCall	GenCall + zCall	GenCall	GenCall	GenCall	Affymetrix Power Tools software + UK biobank custom algorithms	Graphtyper
		31	Jointly called with CHARGE cohorts ?	Yes	Yes	Yes	No	Yes	Yes	No	Yes	No but used Cluster files provided by CHARGE	No	No	No	Yes	No	No	No	No	No	Yes	No	No	No	No	No	No	No	No
	SAMPLE QC	32	Heterozygosity [filter details]	-	-	-	Removed if 3 SD from mean (separately for <1% and >1% MAF)	-	-	-	Removed if heterozygosity F value > 10	-	Removed if >3 SD from mean	-	-	Removed if inbreeding coefficient (F) > 0.2, or <-0.2	Removed if >5 SD from mean	-	-	Removed if heterozygosity out of the range 0.35-0.45	0	-	Removed if high heterozygosity and/or implausible high crypted relatedness	Removed if >3 SD from mean	Removed if >4 SD from mean	0	0	Removed if >5 SD from mean (visually verified)	Removed individuals with high heterozygosity (PC-adjusted heterozygosity above the mean (0.1903))	Details of extensive QC can be found in PMID 25807286
		33	Sample call rate [filter details (%)]	<95%	< 89.9 %	< 89.9 %	<95% (GenCall), <98% (after zCall)	<97%	<97%	-	<95%	<97%	<98%	-	<95%	<95%	<95%	<97%	<95%	<98%	0	<99.9 %	<90% (before zCall) / <98% (after zCall)	<95%	<95%	<95%	<95%	<95%	<95%	<97 %
		34	Relatedness assessment and adjustment methods	-	PI_HAT > 0.4	PI_HAT > 0.4	Duplicates & related excluded by 0.25 IBD pi_hat threshold	First and second degree relatives identified though IBD were removed	First and second degree relatives identified though IBD were removed	-	Analyzed with linear mixed effect model	Gkin matrix calculated and fitted	Excluded first- or second-degree relatives identified based on identity-by-descent allele sharing (PI_HAT>0.185)	-	Exclusion based on IBS clustering, checked for duplicates, first and second degree relatives	Exclusion based on IBS clustering	Exclusion based on IBS clustering, checked for duplicates, first and second degree relatives aftere phenotype exclusions	Gkin matrix calculated and fitted	Gkin matrix calculated and fitted	Checked for duplicates and sample swaps based on IBS	0	Only duplicates excluded	Exclusion based on IBS clustering, checked for duplicates	Exclusion based on IBS clustering, checked for duplicates, first and second degree relatives	Exclusion based on IBS clustering, checked for duplicates, IBD>0.2	Removed duplicates and first-degree relateds based on PLINK IBD	Removed duplicates and first-degree relateds based on PLINK IBD	exclusion based on IBS clustering, checked for duplicates, first and second degree relatives	Post phenotype and sample QC exclusions, we identified pairs of related individuals with kinship coefficient factor > 0.088. From each related pair and whereever possible we prioritised exclusion of individuals with missing data for our analysis. A total 1167 individuals were excluded due to relatedness.	BOLT linear mixed model in addition to LD score regression to account for cryptic relatedness and population stratification
		35	Population stratification assessment and adjustment	Corrected for first 10 PCs	Corrected for first 10 PCs	Corrected for first 10 PC	Removed ethnic outliers identified by plink IBD test when compared to HapMap set, remaining ancestry outliers excluded by PCA, then adjustment using 10 PCs as covariates	Extreme outliers in 10 race specific principal components, race mismatch on PC1 (16 race-combined)	Extreme outliers in 10 race specific principal components, race mismatch on PC1 (16 race-combined)	-	Corrected with PCs	PCA, removed outliers	Adjusted for the first 2 PCs	-	Corrected for first 10 PCs	Corrected for first 10 PCs	Exclusion of 2 population outliers based on IBS / PCs	PCA, removed outliers	PCA, removed outliers	Corrected for first 10 PC	0	Corrected for first 5 PCs	Performed PCA, no adjustment necessary	Corrected for first 10 PCs	Non-European samples removed, corrected for 1PC	PC Adjustment	PC Adjustment	Corrected for first 4 PC	Corrected for the first 10 PCs	BOLT linear mixed model in addition to LD score regression to account for cryptic relatedness and population stratification
		36	Other exclusions	Mismatch previous genotypes, sex mismatch	Plink Sex Check, Genetic Cluster Check	Sex mismatches, Genetic Cluster Checks ,p10GC	Sex mismatch, Identity check fail (based on Sequenom test markers of previous GWAS results)	Duplicate samples(72 race-combined), sex mismatch (31 race-combined)	Duplicate samples(72 race-combined), sex mismatch (31 race-combined)	-	Removed samples with disconcordance with FHS GWAS SNP > 10% or sex mismatched or duplicated samples	-	Duplicate samples, Sex mismatch	-	Duplicate samples, sex mismatch, failed barcoding in comparison with previous genotypes	Duplicate samples, sex mismatch	Sex check based on y-chromosome	-	Duplicates, sex mismatches	Sex mismatches	0	Sex mismatches	Sex mismatches	Duplicate samples, sex mismatch	Sex mismatches	None	None	Sex mismatches, MDS plot outliers (visually inspected)	Sex discordance from the whole resource (378 from 488,377 participants in the UK Biobank study). We took forward for PC clustering only sample QCed individuals with ECGs (N=67,318), of which 5,644 were non-Europeans and excluded.	-
	SNP QC: GENOTYPE FILTERING BEFORE ANALYSIS	37	pHWE [filter detail]	≤1x10-6	-	-	<1x10-4	-	-	-	<1x10-6	<1x10-6	<1×10-6	-	≤1x10-6	≤1x10-6	'-	<1x10-6 (MAF >5%)	≤1x10-6	1x≤10-6	≤1x10-6	<1x10-6	1x≤10-4	≤1x10-6	<1×10-3	<1x10-6	<1x10-6	-	Details of extensive variant QC can be found here : https://www.biorxiv.org/content/biorxiv/early/2017/07/20/166298.full.pdf	<1x10-3
		38	Call rate [N Total SNPs excluded / filter detail]	<0.95%	<0.95%	<0.95%	<0.99%	<97% (race-combined)	<97% (race-combined)	-	<0.95%	<0.99%	<0.95%	-	<0.98%	<0.95%	<0.98%	<0.99%	<0.95%	<0.98%	<0.95%	<97.5%	<90% (before zCall), <95% (after zCall)	<95%	<0.95%	<90%	<90%	<95%	Details of extensive variant QC can be found here : https://www.biorxiv.org/content/biorxiv/early/2017/07/20/166298.full.pdf	<95%
		39	Other SNP QC filters applied after genotyping? [filter detail]	-	-	-	Cluster Separation Score < 0.4	-	-	-	-	-	-	-		-	-	-	Removed SNPs associated with the batches	Removed SNPs not on Exome chip and remove AT/CG pairs and duplicate SNPs	-	-	-	-	-	-	-	Removed SNPs not on Exome chip	Details of extensive variant QC can be found here : https://www.biorxiv.org/content/biorxiv/early/2017/07/20/166298.full.pdf	Details of extensive QC can be found in PMID 25807286
		40	N of genotyped SNPs (before filtering ) [N Total SNPs]	-	247039	247039	247871	227164	227164	-	247039	-	242901	-	-	247039	237982	-	242898	532559	242240	-	247870	246425	242901	-	-	538447	-	-
		41	Other filtering ?	-	-	-	-	Genotype QC and sample / variant counts are combined across CHS samples of both ethnicities. An additional 345 samples an 19875 variants were removed across both ancestries in the CHARGE joint QC effort (PMID:23874508).	Genotype QC and sample / variant counts are combined across CHS samples of both ethnicities. An additional 345 samples an 19875 variants were removed across both ancestries in the CHARGE joint QC effort (PMID:23874508).	-	-	-	-	-	-	-	CHARGE exclude list applied beforehand	-	-	-	-	-	-	-	-	-	-	-	-	-
	DATA ANALYSIS	42	N of SNPs for analysis [N Total SNPs]	232848	233227	233227	245322	227006	227006	241948	238060	234035	240977	245100	224866	234937	232832	236308	240311	209874	235081	238065	246809	245185	241173	224524	215322	238194	-	-
		43	Collapsed & single variants analysis : analysis software (name, version)	R (3.01), seqMeta (1.3)	seqMeta v1.6.0	seqMeta v1.6.0	R (3.01), seqMeta (1.3)	R, seqMeta	R, seqMeta	R, seqMeta (1.6.0)	R (3.01), seqMeta (1.3)	R (2.15.2), seqMeta (1.4)	R (3.0), seqMeta v1.5.0	R & Rare-Metal-Worker	R (2.15), seqMeta (1.3)	R (3.1.0), seqMeta (1.6.0)	R, seqMeta	R (2.15.2), seqMeta (1.4)	R (2.15.2), seqMeta (1.4)	R (3.1), seqMeta (1.5)	R (3.1.0), seqMeta (1.4)	R (3.01), skatCohort	R (2.15.3 "Security Blanket"), seqMeta (1.3)	R (3.01), seqMeta (1.3)	R 3.1.0, seqMeta v1.6.0	R (3.2.0) seqMeta (1.6)	R (3.2.0) seqMeta (1.6)	R (2.15.1), seqMeta (1.3)	SNPTEST v2.5.4	BOLT-LMM
		44	Collapsed & single variants analysis : covariates	AGES, sex, BMI, height, PC1-10	Age, sex, BMI, DNA Collection Center, PC1-10	Age, sex, BMI, DNA Collection Center, PC1-10	Age, sex, BMI, height, centre, PC1-10	Age, sex, BMI, height, centre, PC1-5	Age, sex, BMI, height, centre, PC1-5	Age, sex, BMI, height, Family	Age, sex, BMI, height, Cohort, PCs	Age, sex, BMI, height	Age, sex, BMI, height, PC1-2	Age, sex, BMI, height	Age, sex, BMI, height, PC1-10	Age, sex BMI, height, PC1-PC10	Age, sex, BMI, height	Age, sex, BMI, height	Age, sex, BMI, height, PCA1-5	Age, sex, BMI, height, PC1-10	Age, sex, BMI, height	Age, sex, BMI, height, PC1-5	Age, sex, BMI, height, Cohort, PCs	Age, sex, BMI, height, ECG Device, PC1-10	Age, sex BMI, height, PC1	Age, height, BMI, Study, PC1-2	Age, height, BMI, Study, PC1-2	Age, sex, BMI, height, Study center, PC1-4	Age, sex, BMI, height, PC1-10	Age at measurement,sex,year-of-birth

## Sheet: 2. Single SNP meta-analyses
	Table S2: Single SNP meta-analyses
	Variant details										Discovery																Replication																					Previous studies
											African ancestry-only meta-analysis					European ancestry-only meta-analysis					Ancestry-combined meta-analysis						deCODE					UKBB					UKBB + deCODE European ancestry-only replication					Combined discovery / replication meta-analysis (all ancestries)
	Locus #	chr	position	band	index SNP	dbSNPID	variant function	gene	A1	A2	caf	beta	se	p	ntotal	caf	beta	se	p	ntotal	caf	beta	se	p	ntotal	phet	caf	beta	se	p	ntotal	caf	beta	se	p	ntotal	caf	beta	se	p	ntotal	caf	beta	se	p	ntotal	replication p<1.47x10E-3	novel	PMID*
	1	1	51470242	p32.3	exm2264837	rs11588271	intergenic	—	A	G	0.398945	-0.414392	0.149231	0.00548876	7695	0.326741	-0.335755	0.048237	3.38995e-12	77898	0.333233	-0.343194	0.0458987	7.59237e-14	85593	0.616084	0.26798	-0.515	0.0670776	1.62e-14	59903	0.322276	0.0854869	0.0906931	0.346	51971	0.293203	-0.302669	0.05393	2.05e-08	111874	0.310554	-0.326171	0.034953	1.11e-20	197467	TRUE	N	21076409;27659466
	1	1	51546140	p32.3	exm-rs17391905	rs17391905	intergenic	—	G	T	0.0779372	-0.237847	0.274226	0.385755	7695	0.0246572	-1.0575	0.14529	3.37331e-13	77898	0.0294472	-0.877851	0.128384	8.04692e-12	85593	0.00826168	0.0376	-0.939	0.159558	3.98e-09	59903	0.0224645	-0.279656	0.285335	0.327	51971	0.030569	-0.781938	0.139263	2.02e-08	111874	0.030083	-0.833787	0.094393	1.08e-18	197467	TRUE	N	21076409;27659466
	2	1	116310967	p13.1	exm86861	rs4074536	nonsynonymous	CASQ2	C	T	0.456784	0.0935151	0.147399	0.525797	7695	0.290457	-0.332133	0.0496313	2.20128e-11	77898	0.305411	-0.288789	0.0470365	8.26874e-10	85593	0.00620493	0.27902	-0.363	0.0664278	4.64e-08	59903	0.294886	-0.289042	0.0924769	0.00178	51971	0.28639	-0.337828	0.053951	3.93e-10	111874	0.294635	-0.309967	0.035454	2.41e-18	197467	TRUE	N	21076409;27659466
	3	2	36673555	p22.2	exm-rs7562790	rs7562790	intronic	CRIM1	G	T	0.59203	0.557538	0.149869	0.000199097	7695	0.407565	0.351265	0.045923	2.02537e-14	77898	0.424149	0.36897	0.0439079	4.34168e-17	85593	0.188189	0.38843	0.278	0.061054	5.28e-06	59903	0.402138	0.248174	0.0861718	0.00398	51971	0.394798	0.268032	0.049817	7.6e-08	111874	0.40752	0.32484	0.03294	6.52e-23	197467	TRUE	N	21076409
	4	2	37248015	p22.2	exm-rs17020136	rs17020136	intronic	HEATR5B	C	T	0.0862056	0.209766	0.31109	0.500125	5475	0.195027	0.392939	0.0687403	1.08881e-08	54401	0.185077	0.384412	0.0671212	1.02146e-08	59876	0.565331	0.18741	0.331	0.0760881	1.36e-05	59903	0.193223	0.237398	0.107743	0.0276	51971	0.19011	0.299853	0.062152	1.43e-06	111874	0.188355	0.338887	0.045604	1.12e-13	171750	TRUE	N	27659466;21076409
	5	2	179721046	q31.2	exm249651	rs17362588	nonsynonymous	CCDC141	A	G	0.0172207	-0.0258912	0.572539	0.963931	7695	0.0871946	0.532946	0.0799368	2.60936e-11	77898	0.0809038	0.52226	0.0791689	4.20171e-11	85593	0.333699	0.11681	0.392	0.0926568	2.33e-05	59903	0.0879818	0.356395	0.148774	0.0166	51971	0.103418	0.382049	0.07865	1.21e-06	111874	0.093659	0.451694	0.055797	6e-16	197467	TRUE	Y
	6	3	38103776	p22.2	exm300021	rs116202356	nonsynonymous	DLEC1	A	G	0.00422352	-2.11129	1.13354	0.0625241	7695	0.0165155	-1.61734	0.17702	6.45168e-20	77898	0.0154104	-1.6291	0.174901	1.2258e-20	85593	0.666803	0.00987	-1.588	0.303015	1.6e-07	59903	0.0165862	-1.19382	0.330542	0.000304	51971	0.01299	-1.408	0.223363	3e-10	111874	0.014039	-1.54507	0.137707	3.52e-29	197467	TRUE	Y
	7	3	38357817	p22.2	exm300735	rs2070492	nonsynonymous	SLC22A14	T	C	0.0751986	0.22393	0.281368	0.426112	7695	0.0979345	0.436725	0.0755502	7.44362e-09	77898	0.0958905	0.422415	0.0729657	7.07097e-09	85593	0.465136	0.09008	0.152	0.104224	0.14473	59903	0.100133	0.41979	0.141485	0.00301	51971	0.09475	0.246198	0.083914	0.003358	111874	0.095244	0.346545	0.055061	3.2e-10	197467	FALSE	N	21076409;20062063;23463857
	7	3	38589163	p22.2	exm-rs11129795	rs11129795	downstream	SCN5A	A	G	0.180337	0.79631	0.189564	2.66053e-05	7695	0.241847	0.881922	0.0528941	2.04762e-62	77898	0.236317	0.875738	0.0509479	3.21657e-66	85593	0.663554	0.21503	0.679	0.072777	1.06e-20	59903	0.240557	0.459441	0.0988847	3.39e-06	51971	0.226889	0.601858	0.058614	1.05e-24	111874	0.230976	0.757868	0.038452	2.05e-86	197467	TRUE	N	21076409;21076409;20062063;23463857;27659466
	7	3	38657899	p22.2	exm-rs11710077	rs11710077	intronic	SCN5A	T	A	0.106628	-0.977638	0.23955	4.48146e-05	7695	0.202395	-0.942473	0.0583557	1.12697e-58	72281	0.193181	-0.944443	0.0566977	2.66844e-62	79976	0.886584	0.1808	-0.762	0.077408	7.28e-23	59903	0.203796	-0.633827	0.10502	1.6e-09	51971	0.191483	-0.716879	0.062311	1.35e-30	111874	0.192191	-0.841371	0.041936	1.76e-89	191850	TRUE	N	21076409;21076409;20062063;23463857;27659466
	7	3	38719935	p22.2	exm-rs9851724	rs9851724	intergenic	—	C	T	0.152981	-0.0375529	0.234829	0.872947	6065	0.324702	-0.81915	0.0529156	4.71305e-54	65962	0.310243	-0.78138	0.0516213	9.26253e-52	72027	0.00116648	0.29099	-0.583	0.0655616	5.98e-19	59903	0.317408	-0.552907	0.0909655	1.22e-09	51971	0.303262	-0.572712	0.053187	5.26e-27	111874	0.305996	-0.680163	0.037043	3.03e-75	183901	TRUE	N	21076409;21076409;20062063;23463857;27659466
	7	3	38766675	p22.2	exm301398	rs6795970	nonsynonymous	SCN10A	A	G	0.0985171	0.959177	0.254113	0.000160258	7695	0.398466	0.793334	0.0459651	9.49453e-67	77898	0.3715	0.798588	0.0452311	9.19168e-70	85593	0.520734	0.3578	0.755	0.0622093	6.77e-34	59903	0.398463	0.582834	0.0860761	1.29e-11	51971	0.37669	0.695928	0.05042	2.71e-43	111874	0.37444	0.752811	0.033669	1.13e-110	197467	TRUE	N	21076409;21076409;20062063;23463857;27659466
	7	3	38766760	p22.2	exm301400	rs73062575	nonsynonymous	SCN10A	T	G	0.00604665	1.21327	0.926297	0.190262	7695	0.0274499	0.958547	0.138248	4.10465e-12	77898	0.0255257	0.964098	0.136734	1.7774e-12	85593	0.785642	0.01959	1.034	0.217481	1.99e-06	59903	0.0314502	0.969385	0.24262	6.47e-05	51971	0.0251	1.00521	0.161943	5.56e-10	111874	0.025285	0.981209	0.104474	6.27e-21	197467	TRUE	N	21076409;21076409;20062063;23463857;27659466
	8	3	53282303	p21.1	exm-rs4687718	rs4687718	intronic	TKT	A	G	0.531977	-0.203041	0.14967	0.174911	7695	0.126619	-0.389003	0.0688295	1.58871e-08	75439	0.164139	-0.356541	0.0625339	1.18718e-08	83134	0.258968	0.12354	-0.84	0.0910435	2.8e-20	59903	0.123752	-0.243824	0.128371	0.0575	51971	0.123638	-0.640482	0.074263	6.8e-18	111874	0.140904	-0.474344	0.047834	3.77e-23	195008	TRUE	N	21076409;27659466
	9	3	185331165	q27.2	exm370294	rs6762208	nonsynonymous	SENP2	A	C	0.478611	-0.334588	0.146548	0.022423	7695	0.345264	-0.311669	0.047406	4.88294e-11	77898	0.357252	-0.31384	0.0451048	3.45084e-12	85593	0.88171	0.31991	-0.181	0.0641184	0.0047591	59903	0.347723	-0.00462337	0.0888038	0.958	51971	0.33283	-0.12056	0.051984	0.020408	111874	0.343416	-0.230826	0.034068	1.29e-11	197467	FALSE	Y
	10	5	153869040	q33.2	exm-rs13165478	rs13165478	intergenic	—	A	G	0.532123	-0.701031	0.146312	1.65681e-06	7695	0.361493	-0.675719	0.0469855	6.76772e-47	77898	0.376833	-0.678085	0.0447354	6.74058e-52	85593	0.86917	0.35935	-0.503	0.0620436	5.18e-16	59903	0.369634	-0.456907	0.0874469	1.75e-07	51971	0.364127	-0.487566	0.050601	6.04e-22	111874	0.369635	-0.594503	0.033516	2.41e-70	197467	TRUE	N	21076409;27659466
	11	6	36623379	p21.2	exm-rs9470361	rs9470361	intergenic	—	A	G	0.318304	0.464771	0.156209	0.00292684	7695	0.242059	0.884052	0.0527144	4.00449e-63	77898	0.248914	0.841186	0.0499471	1.21035e-63	85593	0.010984	0.21133	0.745	0.0730487	2.01e-24	59903	0.235045	0.49517	0.0998858	7.17e-07	51971	0.222347	0.657943	0.058963	7.03e-29	111874	0.233863	0.764631	0.038111	1.77e-89	197467	TRUE	N	23463857;20062063;27659466;21076409
	12	6	118667522	q22.31	exm-rs11153730	rs11153730	intergenic	—	C	T	0.281069	0.356318	0.161933	0.0277783	7695	0.49465	0.579345	0.0451087	9.37811e-38	77898	0.475449	0.563285	0.0434542	1.99073e-38	85593	0.184585	0.56075	0.606	0.0598451	4.23e-24	59903	0.491053	0.575571	0.0847503	1.12e-11	51971	0.528372	0.595876	0.048886	3.87e-34	111874	0.505432	0.57767	0.032478	1.02e-70	197467	TRUE	N	21076409;27659466;23583979
	13	6	126966308	q22.32	exm-rs4549631	rs4549631	intergenic	—	C	T	0.344277	0.172566	0.155562	0.267295	7695	0.494402	0.294014	0.0452054	7.82349e-11	77898	0.480906	0.284557	0.0434097	5.55864e-11	85593	0.45344	0.47302	0.289	0.0597698	1.33e-06	59903	0.495045	0.110846	0.0849042	0.192	51971	0.483252	0.229967	0.048874	2.58e-06	111874	0.482235	0.260483	0.032456	1.06e-15	197467	TRUE	Y
	14	7	35305306	p14.2	exm-rs1362212	rs1362212	intergenic	—	A	G	0.0425672	0.372879	0.366547	0.309023	7695	0.153962	0.550285	0.0627663	1.8316e-18	77898	0.143948	0.545231	0.0618658	1.21708e-18	85593	0.633328	0.14448	0.598	0.0845619	1.53e-12	59903	0.159041	0.507795	0.115687	1.14e-05	51971	0.151244	0.566588	0.068269	1.1e-16	111874	0.148081	0.554861	0.045843	1.1e-33	197467	TRUE	N	21076409;27659466
	15	7	46620145	p12.3	exm-rs7784776	rs7784776	intergenic	—	G	A	0.408019	0.315955	0.148498	0.0333637	7695	0.396148	0.26434	0.0463101	1.1429e-08	77898	0.397215	0.268915	0.0442101	1.18218e-09	85593	0.740022	0.35976	0.4	0.0620812	1.17e-10	59903	0.390073	0.17304	0.0867449	0.0461	51971	0.373842	0.323127	0.050484	1.6e-10	111874	0.383973	0.292445	0.03326	1.54e-18	197467	TRUE	N	21076409;27659466
	16	7	116186241	q31.2	exm-rs3807989	rs3807989	intronic	CAV1	A	G	0.646849	0.353962	0.154959	0.0223584	7695	0.404985	0.400425	0.0459405	2.878e-18	77898	0.426729	0.396671	0.0440456	2.1388e-19	85593	0.773748	0.40529	0.361	0.0605623	2.51e-09	59903	0.410017	0.383403	0.0862676	8.83e-06	51971	0.407486	0.368396	0.049567	1.11e-13	111874	0.415827	0.384195	0.032925	1.99e-31	197467	TRUE	N	27659466
	17	8	124663987	q24.13	exm719236	rs16898691	nonsynonymous	KLHL38	G	C	0.0409412	-0.741057	0.36691	0.0434121	7695	0.0401012	-0.937044	0.11928	3.9717e-15	72281	0.040182	-0.918311	0.113436	5.70876e-16	79976	0.611464	0.03327	-0.506	0.16286	0.0018902	59903	0.0409459	-0.642104	0.218165	0.00325	51971	0.036836	-0.554704	0.130507	2.16e-05	111874	0.038231	-0.761828	0.085615	6.01e-19	191850	TRUE	Y
	18	12	57114100	q13.3	exm1014330	rs2926743	nonsynonymous	NACA	A	G	0.104367	-0.486752	0.24379	0.0458683	7695	0.27235	-0.314277	0.0506927	5.65913e-10	77898	0.257248	-0.321425	0.0496311	9.40105e-11	85593	0.488524	0.22637	-0.331	0.0709477	3.08e-06	59903	0.277684	-0.12371	0.0946107	0.191	51971	0.250208	-0.25639	0.056761	6.36e-06	111874	0.25326	-0.293246	0.037363	4.41e-15	197467	TRUE	Y
	19	12	114795443	q24.21	exm-rs3825214	rs3825214	intronic	TBX5	G	A	0.24334	0.265553	0.168875	0.115839	7695	0.195648	0.483742	0.0568736	1.80697e-17	77898	0.199936	0.461516	0.053899	1.10343e-17	85593	0.220785	0.22014	0.659	0.0724437	9.31e-20	59903	0.186441	0.315194	0.108525	0.00368	51971	0.204485	0.553024	0.060253	4.65e-20	111874	0.202513	0.502192	0.040172	8.04e-36	197467	TRUE	N	21076409;27659466;20062063
	20	12	115371958	q24.21	exm-rs7966651	rs7966651	intergenic	—	T	C	0.300831	0.0691867	0.160286	0.666	7695	0.267299	-0.424929	0.0511138	9.30041e-17	77898	0.270313	-0.37932	0.0486977	6.73912e-15	85593	0.00331415	0.35586	-0.368	0.0620858	3.08e-09	59903	0.267377	-0.27158	0.0956898	0.00454	51971	0.314755	-0.339435	0.052083	7.41e-11	111874	0.295492	-0.360716	0.035571	3.9e-24	197467	TRUE	N	21076409
	21	13	74520186	q22.1	exm-rs1886512	rs1886512	intronic	KLF12	A	T	0.470732	-0.0339234	0.146516	0.816901	7695	0.369389	-0.395052	0.0516727	2.08491e-14	63192	0.38039	-0.355104	0.0487309	3.16855e-13	70887	0.0201014	0.31439	-0.367	0.0640596	1.01e-08	59903	0.371227	-0.455091	0.0880743	2.39e-07	51971	0.340794	-0.397478	0.051806	1.77e-14	111874	0.356152	-0.374996	0.035495	4.67e-26	182761	TRUE	N	27659466;21076409
	22	14	72057355	q24.2	exm-rs11848785	rs11848785	intronic	SIPA1L1	G	A	0.0729062	-0.0564482	0.282771	0.841774	7695	0.252711	-0.454148	0.0519127	2.16597e-18	77898	0.236546	-0.441181	0.0510594	5.59468e-18	85593	0.166567	0.23168	-0.416	0.0700672	2.9e-09	59903	0.254171	-0.461884	0.0971724	2.01e-06	51971	0.242128	-0.431696	0.056833	3.2e-14	111874	0.239708	-0.436945	0.037982	1.37e-30	197467	TRUE	N	27659466;21076409
	23	15	99284680	q26.3	exm2252408	rs4966020	intronic	IGF1R	G	A	0.634196	-0.125268	0.153972	0.415886	7695	0.362172	-0.278841	0.0468379	2.62743e-09	77898	0.386627	-0.265834	0.0448105	2.98524e-09	85593	0.339963	0.35824	-0.145	0.0617508	0.018867	59903	0.35283	-0.100013	0.0886717	0.259	51971	0.355727	-0.130308	0.050674	0.010145	111874	0.369121	-0.206362	0.033568	8.11e-10	197467	FALSE	Y
	24	17	45013271	q21.32	exm-rs17608766	rs17608766	UTR3	GOSR2	C	T	0.025731	0.312271	0.474161	0.510168	7695	0.13692	0.706169	0.0659063	8.67962e-27	77898	0.126924	0.698703	0.0652787	9.81263e-27	85593	0.410614	0.13385	0.742	0.0869762	1.45e-17	59903	0.143253	0.447505	0.120746	0.000211	51971	0.138218	0.641396	0.070573	1.07e-19	111874	0.133322	0.672279	0.047921	1.15e-44	197467	TRUE	N	21076409;27659466
	25	17	64318357	q24.2	exm-rs9912468	rs9912468	intronic	PRKCA	G	C	0.376397	0.522214	0.15196	0.000589216	7695	0.420677	0.421058	0.0474853	7.50567e-19	72281	0.416416	0.430057	0.0453239	2.34339e-21	79976	0.525184	0.38529	0.524	0.0607612	6.47e-18	59903	0.420667	0.234742	0.0858354	0.00624	51971	0.401725	0.42744	0.049593	7.14e-18	111874	0.407849	0.428866	0.033456	1.41e-37	191850	TRUE	N	27659466;21076409
	26	18	42456653	q12.3	exm1383990	rs663651	nonsynonymous	SETBP1	G	A	0.465764	-0.314679	0.166633	0.0589649	6065	0.444128	-0.457023	0.0540758	2.87521e-17	55539	0.446258	-0.443461	0.0514352	6.5946e-18	61604	0.416491	0.42275	-0.372	0.0603476	7.08e-10	59903	0.437273	-0.491273	0.0854723	9.09e-09	51971	0.429497	-0.411678	0.049298	7.14e-17	111874	0.435449	-0.426895	0.035591	4.13e-33	173478	TRUE	N	27659466;21076409
	27	20	6404281	p12.3	exm-rs961253	rs961253	intergenic	—	A	C	0.357505	0.314189	0.151978	0.0387036	7695	0.357324	0.303876	0.0470591	1.06566e-10	77898	0.35734	0.304779	0.0449534	1.20277e-11	85593	0.948319	0.35508	0.224	0.0623104	0.00032451	59903	0.358565	0.0604025	0.0878047	0.492	51971	0.356699	0.169206	0.050815	0.000874	111874	0.356977	0.245259	0.033669	3.37e-13	197467	TRUE	Y
	28	20	33587198	q11.22	exm1536298	rs3746435	nonsynonymous	MYH7B	C	G	0.166036	-0.348305	0.197216	0.0773773	7695	0.192546	-0.359875	0.0593319	1.3158e-09	72281	0.189995	-0.358915	0.0568164	2.66518e-10	79976	0.955201	0.17471	-0.308	0.0788875	9.45e-05	59903	0.182294	0.039842	0.109541	0.716	51971	0.178233	-0.189207	0.064015	0.003131	111874	0.183136	-0.284136	0.042493	2.37e-11	191850	FALSE	N	27659466

## Sheet: 3. Sex-stratified analyses
	Table S3: Sex-stratified analyses
	Variant details										Female-only meta-analysis					Male-only meta-analysis
	Locus number	chromosome	position	band	snp	dbSNPID	variant function	gene	A1	A2	beta	se	p	caf	ntotal	beta	se	p	caf	ntotal
	3	2	36673555	p22.2	exm-rs7562790	rs7562790	intronic	CRIM1	G	T	0.358557	0.0631353	1.35344e-08	0.426231	39907	0.34531	0.0746912	3.77918e-06	0.420023	31702
	6	3	38103776	p22.2	exm300021	rs116202356	nonsynonymous	DLEC1	A	G	-1.50974	0.247984	1.14298e-09	0.0156241	39907	-1.8018	0.294944	1.00286e-09	0.0157374	31702
	7	3	38589163	p22.2	exm-rs11129795	rs11129795	downstream	SCN5A	A	G	0.858318	0.072816	4.52825e-32	0.236492	39907	0.870458	0.0868183	1.1692e-23	0.23866	31702
	7	3	38593393	p22.2	exm-rs12053903	rs12053903	intronic	SCN5A	C	T	0.730042	0.0666277	6.14816e-28	0.373435	39907	0.782919	0.0795703	7.62109e-23	0.363499	31702
	7	3	38633923	p22.2	exm-rs11708996	rs11708996	intronic	SCN5A	C	G	0.990024	0.092954	1.73085e-26	0.138808	36889	1.05993	0.111731	2.39019e-21	0.138209	29103
	7	3	38645420	p22.2	exm301164	rs1805124	nonsynonymous	SCN5A	C	T	-0.657513	0.0726482	1.42137e-19	0.236424	39907	-0.706819	0.0866122	3.33013e-16	0.239465	31702
	7	3	38657899	p22.2	exm-rs11710077	rs11710077	intronic	SCN5A	T	A	-0.893827	0.0816222	6.58764e-28	0.191344	36889	-0.89059	0.0972452	5.27743e-20	0.1962	29103
	7	3	38687803	p22.2	exm2265438	rs9841329	intronic	SCN5A	A	G	0.368466	0.0624864	3.70776e-09	0.429132	39907	0.520847	0.0739197	1.83969e-12	0.430227	31702
	7	3	38719935	p22.2	exm-rs9851724	rs9851724	intergenic	—	C	T	-0.765732	0.0673608	6.06223e-30	0.305987	39907	-0.83066	0.0792952	1.11893e-25	0.315715	31702
	7	3	38764998	p22.2	exm301395	rs12632942	nonsynonymous	SCN10A	G	A	-0.418535	0.0717498	5.4354e-09	0.246523	39907	-0.522998	0.084545	6.16976e-10	0.253895	31702
	7	3	38766675	p22.2	exm301398	rs6795970	nonsynonymous	SCN10A	A	G	0.759347	0.0647409	9.05031e-32	0.369004	39907	0.822909	0.0766059	6.45536e-27	0.375201	31702
	7	3	38766760	p22.2	exm301400	rs73062575	nonsynonymous	SCN10A	T	G	0.690505	0.199677	0.000543965	0.0246357	39907	1.26244	0.229534	3.7977e-08	0.0263754	31702
	7	3	38768300	p22.2	exm301409	rs57326399	nonsynonymous	SCN10A	C	T	-0.507802	0.071973	1.72043e-12	0.244842	39907	-0.617148	0.0847571	3.30445e-13	0.253096	31702
	7	3	38774832	p22.2	exm-rs6800541	rs6800541	intronic	SCN10A	C	T	0.727586	0.0644462	1.47329e-29	0.376107	39907	0.785368	0.0767356	1.38586e-24	0.381576	31702
	10	5	153867221	q33.2	exm2270149	rs13178677	intergenic	—	T	C	0.434097	0.0618486	2.23929e-12	0.493969	39907	0.42725	0.0742975	8.89634e-09	0.497325	31702
	10	5	153869040	q33.2	exm-rs13165478	rs13165478	intergenic	—	A	G	-0.643909	0.0638971	6.963e-24	0.377785	39907	-0.669774	0.0764115	1.86183e-18	0.374196	31702
	11	6	36623379	p21.2	exm-rs9470361	rs9470361	intergenic	—	A	G	0.819253	0.0714488	1.94805e-30	0.248285	39907	0.976232	0.0858878	6.15005e-30	0.245409	31702
	11	6	36632688	p21.2	exm2270465	rs13196885	intergenic	—	T	C	-0.552417	0.0632967	2.60555e-18	0.478371	39907	-0.593477	0.0750632	2.64998e-15	0.485745	31702
	12	6	118578043	q22.31	exm-rs89107	rs89107	intronic	SLC35F1	A	G	0.458482	0.061687	1.06658e-13	0.4953	39907	0.549501	0.0734556	7.39144e-14	0.49541	31702
	12	6	118667522	q22.31	exm-rs11153730	rs11153730	intergenic	—	C	T	0.536934	0.0620906	5.2599e-18	0.473689	39907	0.600419	0.0739264	4.5912e-16	0.47882	31702
	12	6	118680374	q22.31	exm-rs11970286	rs11970286	intergenic	—	T	C	0.535855	0.0626769	1.23643e-17	0.437103	39907	0.551485	0.0744208	1.25961e-13	0.440783	31702
	12	6	118887303	q22.31	exm574982	rs3734381	nonsynonymous	CEP85L	T	C	-0.463772	0.0634133	2.60315e-13	0.452762	37634	-0.494819	0.0756942	6.2732e-11	0.455038	30277
	14	7	35305306	p14.2	exm-rs1362212	rs1362212	intergenic	—	A	G	0.507534	0.089065	1.20886e-08	0.139837	39907	0.601835	0.104328	7.99002e-09	0.145905	31702
	14	7	35332117	p14.2	exm2258322	rs10265222	intergenic	—	C	T	0.436187	0.061653	1.49586e-12	0.46476	39907	0.312167	0.0740228	2.47381e-05	0.468182	31702
	16	7	116186241	q31.2	exm-rs3807989	rs3807989	intronic	CAV1	A	G	0.422315	0.0630332	2.08583e-11	0.427131	39907	0.330516	0.0751471	1.09125e-05	0.423071	31702
	17	8	124658203	q24.13	exm719207	rs72711231	nonsynonymous	KLHL38	C	T	-0.992867	0.162591	1.01811e-09	0.0369292	39907	-0.665746	0.201027	0.00092723	0.034915	31702
	17	8	124663987	q24.13	exm719236	rs16898691	nonsynonymous	KLHL38	G	C	-0.953303	0.160206	2.67334e-09	0.041358	36889	-0.721313	0.199957	0.000309353	0.0386103	29103
	19	12	114795443	q24.21	exm-rs3825214	rs3825214	intronic	TBX5	G	A	0.522452	0.0768657	1.06857e-11	0.201724	39907	0.336647	0.0924765	0.000272259	0.198491	31702
	20	12	115371958	q24.21	exm-rs7966651	rs7966651	intergenic	—	T	C	-0.344421	0.0694432	7.05824e-07	0.27291	39907	-0.527803	0.0835054	2.60583e-10	0.266471	31702
	22	14	72057355	q24.2	exm-rs11848785	rs11848785	intronic	SIPA1L1	G	A	-0.402046	0.0731387	3.86235e-08	0.234727	39907	-0.403072	0.0869118	3.52295e-06	0.239856	31702
	24	17	45013271	q21.32	exm-rs17608766	rs17608766	UTR3	GOSR2	C	T	0.602624	0.0930068	9.21148e-11	0.127159	39907	0.938162	0.110152	1.63748e-17	0.130599	31702
	25	17	64280153	q24.2	exm2268016	rs56152251	intergenic	—	A	G	0.206933	0.0624728	0.000925117	0.427919	39907	0.423191	0.0747232	1.48357e-08	0.431089	31702
	25	17	64318357	q24.2	exm-rs9912468	rs9912468	intronic	PRKCA	G	C	0.338955	0.0652258	2.02929e-07	0.412276	36889	0.490334	0.0779389	3.14894e-10	0.418934	29103
	26	18	42456653	q12.3	exm1383990	rs663651	nonsynonymous	SETBP1	G	A	-0.361644	0.0666092	5.65603e-08	0.443111	34145	-0.551468	0.0801092	5.82161e-12	0.450161	27041
	N/A -Novel	20	39832628	q12	exm1541485	rs17265513	nonsynonymous	ZHX3	C	T	-0.0138336	0.0808522	0.864147	0.177512	39907	-0.516387	0.0946612	4.89444e-08	0.18667	31702
	* Locus number of Single SNP meta-analysis, Supplementary table 2

## Sheet: 4. SKAT analyses
	Table S4: SKAT analyses
	EA+AA, SKAT, all variants, MAF range 0.00 - 0.01						EA+AA, SKAT, nonsynonynous and splice variants, MAF range 0.00 - 0.01						EA+AA, SKAT, damaging variants only, mafRange 0.00 - 0.01
	gene	p	Qmeta	cmaf	nsnps		gene	p	Qmeta	cmaf	nsnps		gene	p	Qmeta	cmaf	nsnps
	ADAMTS6	5.52921e-07	124027	0.0144327	14		ADAMTS6	5.52921e-07	124027	0.0144327	14		ADAMTS6	8.17655e-08	100872	0.00966063	12
	SCN5A	4.3852e-06	184497	0.0356632	35		SCN5A	4.3852e-06	184497	0.0356632	35		CSRP3	9.10351e-06	88939.2	0.00476193	3
	CSRP3	9.09905e-06	89031.9	0.00482619	4		CSRP3	9.09905e-06	89031.9	0.00482619	4		FHOD3	1.81737e-05	106917	0.0171422	17
	S100A5	3.66321e-05	101393	0.00751545	2		S100A5	3.66321e-05	101393	0.00751545	2		ISM1	5.88466e-05	34610.6	0.0036984	5
	ISM1	7.23112e-05	35402.7	0.00420668	7		ISM1	5.68284e-05	34989.8	0.00387954	6		TBX5	7.79626e-05	138501	0.0171294	8
	TBX5	7.60874e-05	141205	0.0191979	13		TBX5	7.60874e-05	141205	0.0191979	13		CYP4F12	0.000110922	39074.3	0.00438416	7
	TIRAP	0.000101365	58298.9	0.00780101	10		TIRAP	0.000101365	58298.9	0.00780101	10		POLR3G	0.000177882	3531.78	0.000286797	2
	PLIN4	0.000148104	118982	0.0235033	32		PLIN4	0.000148104	118982	0.0235033	32		TMEM61	0.000260337	16870.3	0.00123286	3
	POLR3G	0.000206297	3532.81	0.000335022	3		POLR3G	0.000206297	3532.81	0.000335022	3		TINAG	0.000274906	21762	0.00264989	8
	FAM151A	0.000265606	78616.9	0.0137646	19		FAM151A	0.000265606	78616.9	0.0137646	19		CEP70	0.000284438	32937.1	0.00473057	11
	FHOD3	0.000277582	112365	0.0254495	22		FHOD3	0.000277582	112365	0.0254495	22		RHPN1	0.000289991	8061.61	0.000549668	2
	PACSIN3	0.000313981	20180.9	0.0032289	10		PACSIN3	0.000313981	20180.9	0.0032289	10		DCLK2	0.000363375	36898.6	0.00365115	6
	DCLK2	0.00038401	36986.6	0.0039257	8		OR10A7	0.000378884	138590	0.0110393	14		CSAD	0.000470433	52508.2	0.00601085	9
	OR10A7	0.00038574	138620	0.0113374	15		DCLK2	0.00038401	36986.6	0.0039257	8		ARMC10	0.000480452	44357.2	0.00587546	3
	IL17RE	0.000469215	151106	0.0384532	17		IL17RE	0.000469215	151106	0.0384532	17		OR10A7	0.000496303	42067.7	0.0033541	5
	CSAD	0.000558232	53869.3	0.00775397	15		CSAD	0.000558232	53869.3	0.00775397	15		CLEC4F	0.000581587	49605.6	0.00653608	5
	MIA3	0.000648893	118121	0.0301001	40		MIA3	0.000648893	118121	0.0301001	40		MATN3	0.000619233	5362.8	0.000812085	7
	C10orf96	0.000684688	7469.38	0.000588643	3		C10orf96	0.000684688	7469.38	0.000588643	3		TNRC6C	0.000625181	30393.7	0.00583285	15
	TTC29	0.000692488	99065.1	0.0213952	12		TTC29	0.000692488	99065.1	0.0213952	12		IRF5	0.000696923	502.103	4.92038e-05	2
	POTEA	0.000714334	73902.7	0.0155337	8		POTEA	0.000714334	73902.7	0.0155337	8		PDRG1	0.000796831	3184.48	0.000239527	2
	C14orf182	0.000780047	13962	0.00181589	6		TUBA8	0.000839088	36759.7	0.00567677	8		BSG	0.000833898	3721.31	0.000657268	4
	TUBA8	0.000857369	36792.2	0.00583296	9		OSTN	0.000970263	13414.6	0.000999131	2		TUBA8	0.000839088	36759.7	0.00567677	8
	OSTN	0.000970263	13414.6	0.000999131	2		CALN1	0.00105557	2591.49	0.000379511	3		TTN	0.00101037	616016	0.354694	434
	CALN1	0.00105557	2591.49	0.000379511	3		PPP1R14D	0.0010723	52058.2	0.00449441	3		CDH5	0.00104498	20734.8	0.00247098	7
	PPP1R14D	0.0010723	52058.2	0.00449441	3		PCDHA11	0.0010843	22896	0.00382519	10		CALN1	0.00105557	2591.49	0.000379511	3
	PCDHA11	0.0010843	22896	0.00382519	10		GATA4	0.00108462	44860.4	0.00798866	7		SCN5A	0.00107473	97253.6	0.025518	23
	GATA4	0.00108462	44860.4	0.00798866	7		MNT	0.00110385	8037.23	0.000882558	3		MNT	0.00110385	8037.23	0.000882558	3
	CABP5	0.00111828	19481.1	0.0026845	7		CABP5	0.00111828	19481.1	0.0026845	7		UNC5B	0.00115799	107161	0.0192005	17
	C22orf40	0.00120904	1758.02	0.00019281	2		C22orf40	0.00120904	1758.02	0.00019281	2		EIF4ENIF1	0.00121927	52091.3	0.00731176	12
	C1orf131	0.00124496	42485.7	0.00679275	7		FRMD6	0.00121426	22201.5	0.00481978	14		C14orf182	0.00122074	12714.6	0.00141517	2
	SLC18B1	0.00127293	62376.3	0.00985182	17		C14orf182	0.00122074	12714.6	0.00141517	2		CSPG4	0.00122301	7406.29	0.000837508	6
	MNT	0.00127599	8333.27	0.00163526	7		C1orf131	0.00124496	42485.7	0.00679275	7		CIAO1	0.0013387	24899.4	0.00311298	7
	RABEP2	0.00129362	13388.3	0.00199315	6		SLC18B1	0.00127293	62376.3	0.00985182	17		DAPK1	0.00148246	63674.1	0.0115282	12
	PGLYRP3	0.00133439	91315.1	0.0256117	25		RABEP2	0.00133113	13073.7	0.00183541	5		TAF6	0.00151676	28196.4	0.00382679	5
	UNC5B	0.00133554	108745	0.0221396	20		UNC5B	0.00133554	108745	0.0221396	20		LMNB2	0.00154195	7724.36	0.00092074	4
	ASIC1	0.00138017	26710.8	0.00257309	3		ASIC1	0.00136773	26710	0.00253804	2		MYLK	0.00156634	31167.8	0.00784412	17
	PCDHGB6	0.00140977	85606	0.0145455	10		PCDHGB6	0.00140977	85606	0.0145455	10		BEND7	0.00162609	9626.91	0.00194623	8
	HOXA9	0.00146196	25313.8	0.00385095	7		HOXA9	0.00146196	25313.8	0.00385095	7		SLA2	0.00192479	25116.1	0.00333453	5
	SUGT1	0.00146694	50017.4	0.00949601	6		SLC6A2	0.00148296	111991	0.0248777	9		NDUFB10	0.00197924	2915.82	0.000377155	2
	SLC6A2	0.00148296	111991	0.0248777	9		PLXNA4	0.00157055	111649	0.0357478	40		VRTN	0.00198978	15822.3	0.00326399	7
	C9orf117	0.00157967	51959.9	0.0108214	18		C9orf117	0.00157967	51959.9	0.0108214	18		ANKRD13A	0.00209825	7359.09	0.00112064	3
	MDH1B	0.00163882	14043.9	0.00382898	15		MDH1B	0.00163882	14043.9	0.00382898	15		TBL3	0.00224277	21814.3	0.00401299	9
	TAF6	0.0016487	49054.7	0.00862311	9		TAF6	0.0016487	49054.7	0.00862311	9		ADAMTS1	0.00229663	68085.9	0.0123352	7
	PLXNA4	0.00174222	112364	0.0376175	42		KCNJ1	0.00172738	10059	0.00183905	10		NRBP1	0.00233049	39532.5	0.00441671	4
	CUL4A	0.00174255	80189.1	0.0109124	9		CUL4A	0.00174255	80189.1	0.0109124	9		OMA1	0.00236083	36611.9	0.00452985	4
	THUMPD2	0.00192915	28936.1	0.00436531	14		MEOX1	0.0017855	19087.6	0.00344655	9		AAGAB	0.0024937	49893.6	0.00609379	4
	TTN	0.00195	1.15038e+06	0.714265	729		THUMPD2	0.00192915	28936.1	0.00436531	14		GLB1L3	0.00251664	73145.5	0.0144924	5
	RIOK1	0.0019894	98170.7	0.0239554	12		RIOK1	0.0019894	98170.7	0.0239554	12		SGCE	0.00252081	9489.27	0.000888157	2
	TSPYL1	0.00202407	47330.6	0.00529241	7		SHE	0.00200204	4765.27	0.000773352	6		EFS	0.00259859	50875.9	0.0137378	11
	GPRIN3	0.00203399	163507	0.0406375	33		TSPYL1	0.00202407	47330.6	0.00529241	7		TIE1	0.00260124	29993.1	0.00743911	17
	DAPK1	0.00209175	73488.4	0.0169706	15		GPRIN3	0.00203399	163507	0.0406375	33		SEC62	0.00268183	31423.3	0.00312152	3
	IMPA2	0.00211567	46056.5	0.00942149	6		DAPK1	0.00211135	73158.9	0.0167953	14		PCDHA11	0.00274462	7524.53	0.000854839	4
	NDUFB10	0.0021344	2915.94	0.000400579	3		IMPA2	0.00211567	46056.5	0.00942149	6		CD44	0.00275004	25562.9	0.00268233	6
	CIAO1	0.00215199	25092.7	0.00442738	10		NDUFB10	0.0021344	2915.94	0.000400579	3		ST14	0.00276975	40439.2	0.00830739	13
	ARMC10	0.00216126	44959.5	0.0101619	6		CIAO1	0.00215199	25092.7	0.00442738	10		ZFX	0.00289861	13252	0.00203357	4
	LMNB2	0.00222433	9005.05	0.00192032	12		ARMC10	0.00216126	44959.5	0.0101619	6		MPI	0.00290993	4286.97	0.000730527	5
	CLEC3A	0.00226074	19590	0.0038051	8		KSR1	0.00220888	36867.7	0.00763515	9		TPST1	0.00295705	13902.2	0.00136113	3
	RNF8	0.0023293	890.235	0.000120645	2		LMNB2	0.00222433	9005.05	0.00192032	12		ZNF468	0.00297597	1720.05	0.000251765	3
	NRBP1	0.00233049	39532.5	0.00441671	4		CLEC3A	0.00226074	19590	0.0038051	8		GPRIN1	0.00304057	3187.04	0.000280419	2
	TRAPPC12	0.00238726	40752.7	0.0115871	18		RNF8	0.0023293	890.235	0.000120645	2		SNX14	0.00304951	41265.8	0.00656271	10
	KSR1	0.00243756	36880	0.00802656	10		NRBP1	0.00233049	39532.5	0.00441671	4		CDK13	0.00305235	42757.2	0.00988076	9
	MCCC2	0.00246054	41179.9	0.00796268	14		TRAPPC12	0.00238726	40752.7	0.0115871	18		GAB2	0.00306912	3540.52	0.000403919	5
	SGCE	0.00252081	9489.27	0.000888157	2		TTN	0.00245747	1.12305e+06	0.703891	724		AMZ1	0.00308446	64710.6	0.014034	19
	RBM20	0.00255583	107139	0.0348185	13		MCCC2	0.00246054	41179.9	0.00796268	14		FAM186B	0.00308837	16238.7	0.00166635	3
	GLI1	0.00262503	47493.8	0.0107059	18		SGCE	0.00252081	9489.27	0.000888157	2		DDX51	0.0030985	74763.4	0.0149418	7
	SMOX	0.00263362	55414.4	0.00799499	7		RBM20	0.00255583	107139	0.0348185	13		FRMD4B	0.00311168	87058.9	0.0270144	25
	TRIM7	0.00263997	80790.7	0.0156445	13		GLI1	0.00262503	47493.8	0.0107059	18		KIAA0020	0.00312342	43981.4	0.0102766	20
	SEC62	0.0027002	31444.9	0.00316826	4		TRIM7	0.00263997	80790.7	0.0156445	13		CMPK2	0.00312482	1137.89	0.000139907	3
	GALNT5	0.00275623	71414.6	0.0177197	22		SEC62	0.0027002	31444.9	0.00316826	4		C12orf65	0.0031562	3414.44	0.000333002	2
	ADAMTS1	0.00281108	75047.8	0.0182171	18		GALNT5	0.0027046	70897.5	0.0171702	21		DNAJB2	0.00318116	5440.8	0.000718517	2
	DAZL	0.00286653	1968.63	0.000252342	4		ADAMTS1	0.00281108	75047.8	0.0182171	18		CTSZ	0.0034037	57354.1	0.00706277	2
	CYP4F8	0.00292948	23657.9	0.00462623	8		GTF3C1	0.00285557	30703.4	0.010289	31		ASNSD1	0.00345143	2126.31	0.000309609	3
	GLB1L3	0.00294144	80856	0.0211492	16		DAZL	0.00286653	1968.63	0.000252342	4		MORC3	0.00359122	27034.5	0.00374034	3
	TPST1	0.00297104	13904.6	0.00137281	4		PGLYRP3	0.00289398	76250	0.0211881	23		RAD51B	0.00364176	21365.5	0.00328957	5
	C19orf57	0.00301908	127873	0.0442071	23		CYP4F8	0.00292948	23657.9	0.00462623	8		RHOT1	0.00370201	10799.4	0.00153277	4
	GTF3C1	0.00304197	30708.5	0.0104409	32		GLB1L3	0.00294144	80856	0.0211492	16		TRIM8	0.00372652	5903.16	0.000791508	2
	SMTN	0.00305986	94941.4	0.0292667	23		TPST1	0.00297104	13904.6	0.00137281	4		CYP4F22	0.00375078	9372.62	0.00243998	13
	C12orf65	0.0031562	3414.44	0.000333002	2		C19orf57	0.00301908	127873	0.0442071	23		CC2D2A	0.00383438	74203.6	0.0151679	21
	SNX14	0.00321408	41283.8	0.00688127	12		SMTN	0.00305986	94941.4	0.0292667	23		C1orf131	0.00386142	32960.4	0.00523961	4
	PPP2R5B	0.0032393	4592.51	0.000831408	4		AAGAB	0.00307504	52043.7	0.00898026	9		CEP63	0.00393477	11262.4	0.00147885	6
	C1orf174	0.00327824	84886.7	0.0224046	17		C12orf65	0.0031562	3414.44	0.000333002	2		GALNT2	0.00397546	16777.9	0.00266224	7
	EPB42	0.00332769	78425.9	0.0211653	19		EPB42	0.00320853	78411	0.0208206	18		MARS	0.00406514	13426	0.00262487	10
	GPR112	0.00344511	145359	0.0524097	48		SNX14	0.00321408	41283.8	0.00688127	12		FER	0.00413365	59877.8	0.0112714	9
	C20orf26	0.00358157	98465.2	0.0344614	39		PPP2R5B	0.0032393	4592.51	0.000831408	4		NOS2	0.00416855	10450.8	0.0023811	8
	MORC3	0.00364185	28110.1	0.00456421	8		C1orf174	0.00327824	84886.7	0.0224046	17		DSCR4	0.004301	14081.1	0.00177492	3
	IFNW1	0.00368113	37165	0.00518522	6		GPR112	0.00344511	145359	0.0524097	48		FLRT3	0.0044942	3529.02	0.00063678	5
	LEMD2	0.00368663	8523.34	0.00119186	4		C20orf26	0.00358157	98465.2	0.0344614	39		DAZL	0.00457098	798.797	0.000100191	3
	MYLK	0.00369861	52228	0.0189581	39		MORC3	0.00364185	28110.1	0.00456421	8		TGM1	0.00466231	79319.7	0.0197107	22
	PNKP	0.00374877	36637.3	0.00969721	16		IFNW1	0.00368113	37165	0.00518522	6		EXT1	0.00467048	3674.13	0.000613689	3
	SPATA24	0.00378599	61610.6	0.00968538	2		LEMD2	0.00368663	8523.34	0.00119186	4		C9orf117	0.00468752	36580.7	0.00743048	8
	AAGAB	0.00384148	52045.5	0.0103496	10		MYLK	0.00369861	52228	0.0189581	39		NHLRC2	0.00472812	23470.2	0.00360835	6
	EFS	0.00386	79624.4	0.0260479	19		PNKP	0.00375882	36302.1	0.00945702	14		IQCA1	0.00483976	58620.8	0.0120575	8
	GALNT2	0.00395763	17295.9	0.00299869	10		GPSM1	0.00377031	37961.1	0.00746879	10		DEPDC7	0.00485702	35393.3	0.00474324	4
	RHOT1	0.00396178	10799.4	0.00163208	5		SPATA24	0.00378599	61610.6	0.00968538	2		TAAR5	0.00498999	65097.6	0.0148457	10
	TAB3	0.00397633	15232.9	0.00127095	3		EFS	0.00386	79624.4	0.0260479	19		EHF	0.00508824	1398.67	0.000262096	5
	RASGEF1A	0.00402598	12894.4	0.00253433	4		GALNT2	0.00395763	17295.9	0.00299869	10		KIF2B	0.00519507	60142.4	0.0143451	14
	AMZ1	0.00403596	65664.8	0.0184618	26		RHOT1	0.00396178	10799.4	0.00163208	5		PTPDC1	0.00522552	32768.6	0.00590279	6
	C11orf53	0.00406487	5129	0.000743893	3		TAB3	0.00397633	15232.9	0.00127095	3		GAS2L2	0.00525354	16392.5	0.00323374	12
	ALK	0.00414256	34746.1	0.00895673	27		RASGEF1A	0.00402598	12894.4	0.00253433	4		HSF4	0.00530928	377.223	5.64103e-05	2
	BRD1	0.00418263	70393.3	0.0170711	12		AMZ1	0.00403596	65664.8	0.0184618	26		PRDM1	0.00532042	21083.4	0.00434864	7
	VCP	0.0042259	3181.56	0.000373873	2		C11orf53	0.00406487	5129	0.000743893	3		PTPRH	0.00543057	64231.6	0.0131482	12
	WDR25	0.00423807	75420.4	0.0180906	16		ALK	0.00414256	34746.1	0.00895673	27		DHX58	0.00548087	6618.33	0.00167308	14
	ESRP1	0.00428352	16811.4	0.00199968	5		BRD1	0.00417802	70391.3	0.0170585	11		SLCO2A1	0.00566491	27049.3	0.00645748	14
	MYT1	0.00434442	40828.3	0.00968954	15		WDR25	0.00423807	75420.4	0.0180906	16		GPR61	0.00567802	1559.4	0.000222008	2
	CC2D2A	0.00437012	83316.1	0.0234882	34		ESRP1	0.00428352	16811.4	0.00199968	5		PRKAG2	0.00568113	34626.3	0.00532394	2
	DDX27	0.00438186	30651.2	0.00638602	15		MYT1	0.00433162	40742.9	0.0096136	14		RFC1	0.00578355	38843.2	0.00971717	10
	DDX51	0.00443007	76595.9	0.0197484	20		CC2D2A	0.00436578	83307.8	0.0234707	33		OLFML2A	0.00582482	30720.1	0.00680878	11
	FARS2	0.00445004	57271.4	0.0113607	13		TIE1	0.00438878	36442.5	0.0120369	26		TEAD1	0.00593387	1612.65	0.00022784	2
	SIGLEC9	0.00449048	71238.3	0.0193801	10		NCR2	0.00440921	69516.7	0.0158735	9		OR6K2	0.0059525	3547.52	0.000894336	8
	TIE1	0.00449855	36458.4	0.0121248	27		DDX27	0.00442303	30511	0.00631592	14		DDX27	0.0062479	20599.6	0.00345937	10
	SLC9A10	0.00454622	68968.1	0.0168447	22		DDX51	0.00443007	76595.9	0.0197484	20		SLC39A12	0.00624871	38323	0.00686328	7
	SLC4A8	0.00458975	14725.3	0.00338394	5		SIGLEC9	0.00449048	71238.3	0.0193801	10		WDR7	0.00626757	20635.9	0.0050578	11
	FLRT3	0.00470029	3532.26	0.000661788	6		SLC9A10	0.00454622	68968.1	0.0168447	22		RSAD2	0.00640852	3850.45	0.000759928	8
	WNK4	0.00472348	103687	0.0421178	27		SLC4A8	0.00458975	14725.3	0.00338394	5		HOXC12	0.00641224	22528.1	0.00365702	2
	FAM20A	0.00474899	18439.2	0.0041735	16		FLRT3	0.00470029	3532.26	0.000661788	6		AMZ2	0.0064175	3700.3	0.000554952	2
	ZFYVE27	0.00475362	41790.3	0.00870132	7		WNK4	0.00472348	103687	0.0421178	27		CXCR4	0.00644004	3414.46	0.000493853	2
	GPANK1	0.00477118	49868.6	0.0117798	6		FAM20A	0.00474899	18439.2	0.0041735	16		NKAPL	0.00647368	51719.1	0.00786669	5
	DEPDC7	0.00485171	35967.4	0.00519821	9		ZFYVE27	0.00475362	41790.3	0.00870132	7		DMRT1	0.00661955	10048.5	0.00166396	4
	PDGFRB	0.00487864	71007.7	0.0213881	29		DEPDC7	0.00485171	35967.4	0.00519821	9		FAT2	0.00670905	117857	0.0478754	50
	HAPLN1	0.00500829	9485.45	0.00150978	7		PDGFRB	0.00487864	71007.7	0.0213881	29		CUEDC1	0.00672773	9046.38	0.00108006	2
	HERPUD2	0.0050407	61381.1	0.0095765	6		PRKAG2	0.00494394	37219.1	0.006559	7		WSB1	0.00677054	6329.59	0.00118134	4
	ATP10D	0.00505102	76478.5	0.0226994	29		HAPLN1	0.00500829	9485.45	0.00150978	7		OR5AU1	0.00677389	56431.6	0.0138555	10
	IKBKB	0.00511085	18516.6	0.00421353	12		TBX19	0.00502269	15414.4	0.00229811	8		YIPF1	0.00678698	24884.5	0.00380689	7
	ZNF354C	0.00517645	47147.9	0.0143491	12		HERPUD2	0.0050407	61381.1	0.0095765	6		ORAOV1	0.00680285	2199.38	0.000287441	2
	TBX19	0.0051828	15444.8	0.00242363	9		ATP10D	0.00505102	76478.5	0.0226994	29		JPH2	0.00680804	5728.3	0.000770746	4
	TMEM14E	0.00521125	8501.15	0.00139617	4		EHF	0.00508824	1398.67	0.000262096	5		MAT2B	0.006937	2440.45	0.000408379	2
	EPC1	0.0052531	53829.4	0.0143661	12		IKBKB	0.00511085	18516.6	0.00421353	12		RFTN1	0.0069405	5612.31	0.00116123	4
	PRKAG2	0.00525598	37283.6	0.00694462	8		ZNF354C	0.00517645	47147.9	0.0143491	12		HSPB6	0.00699645	2733.4	0.000363084	2
	BMP5	0.0053163	42389.1	0.0124268	8		TMEM14E	0.00521125	8501.15	0.00139617	4		GCNT2	0.00707971	52014.7	0.00906343	6
	NCR2	0.00546356	70056.4	0.0187696	13		BMP5	0.0053163	42389.1	0.0124268	8		SPAST	0.00708125	58350.2	0.00978625	3
	IQCA1	0.00562683	79752.5	0.0281135	23		WDR7	0.00538309	22105.2	0.00575211	16		TRIM7	0.00712086	50329.4	0.0116216	7
	OR10W1	0.00568613	57227.3	0.011667	6		IQCA1	0.00562683	79752.5	0.0281135	23		ACSM1	0.00713731	44708.6	0.00790366	8
	WDR7	0.0056868	22501.6	0.00616338	18		OR10W1	0.00568613	57227.3	0.011667	6		ITLN1	0.00720561	41813.1	0.00857232	8
	HSD3B2	0.00569761	32858.5	0.00535971	3		HSD3B2	0.00569761	32858.5	0.00535971	3		FXC1	0.00728063	28570	0.00517075	2
	CCDC63	0.00576085	73209.9	0.0240617	23		FANCB	0.00578067	21323.7	0.0046709	10		OR6A2	0.00731187	12990.3	0.00292003	9
	FANCB	0.00578067	21323.7	0.0046709	10		OR5K1	0.00578223	21568.1	0.00503519	5		C2orf47	0.00733019	4708.63	0.000519978	2
	OR5K1	0.00578223	21568.1	0.00503519	5		RASGEF1C	0.00580504	6456.72	0.00114717	3		CSF1	0.00743393	699.749	0.000106302	2
	KCNE2	0.00581149	14779.7	0.00246469	4		KCNE2	0.00581149	14779.7	0.00246469	4		EEF2K	0.00755007	32641.6	0.00637888	18
	NKIRAS1	0.00581659	2484.71	0.000434182	3		NKIRAS1	0.00581659	2484.71	0.000434182	3		CAMKK2	0.00768024	3867.93	0.000654285	5
	FBXL21	0.00586615	48412.5	0.0140754	16		FBXL21	0.00585955	48412.3	0.0140685	15		SMAD6	0.00768137	44424.1	0.00678926	3
	IL21R	0.00587851	83436.5	0.0236362	9		IL21R	0.00587851	83436.5	0.0236362	9		WDR88	0.00771956	1800.73	0.000300485	2
	RAB40C	0.00593217	1935.43	0.000199574	2		RAB40C	0.00593217	1935.43	0.000199574	2		GUCA1C	0.00772958	66253.4	0.0157121	3
	TEAD1	0.00593387	1612.65	0.00022784	2		TEAD1	0.00593387	1612.65	0.00022784	2		TBX15	0.00779136	37215.2	0.00645949	7
	KRT73	0.00597933	61484.2	0.0148081	24		NRD1	0.00594266	46369.5	0.0130042	16		POP1	0.00784843	16501.1	0.00420051	7
	KIAA0020	0.00600579	48501.8	0.0147894	29		KRT73	0.00594273	61473.7	0.0147496	23		CCDC64B	0.00794078	23337.6	0.00588878	4
	FAM115A	0.00606906	12586.1	0.00205439	5		KIAA0020	0.00600579	48501.8	0.0147894	29		LHFPL5	0.00816083	4599.84	0.00105649	5
	PLCG1	0.00608172	3930.24	0.00113936	12		FAM115A	0.00606906	12586.1	0.00205439	5		RBPJL	0.0082156	28878.1	0.00662036	8
	ZNF160	0.00609496	67629.7	0.0179902	15		PLCG1	0.00608172	3930.24	0.00113936	12		NR5A2	0.00822758	1998.46	0.000251189	2
	P4HA2	0.00612481	18237.2	0.00381308	13		ZNF160	0.00609496	67629.7	0.0179902	15		PLBD1	0.00850402	45710.9	0.00677645	2
	ITLN1	0.00612632	43723.8	0.00890547	11		P4HA2	0.00612481	18237.2	0.00381308	13		GRXCR2	0.00852183	8177.58	0.00146631	4
	TTC33	0.0061427	14422.7	0.00253381	4		ITLN1	0.00612632	43723.8	0.00890547	11		UHMK1	0.00854991	22504.2	0.00340211	2
	RFC1	0.00623111	55653.7	0.0198175	23		TTC33	0.0061427	14422.7	0.00253381	4		CISH	0.00855689	5292.19	0.000877172	5
	KRT33A	0.00628204	12200.6	0.00170377	3		RFC1	0.00623111	55653.7	0.0198175	23		GSTM5	0.0085862	10829.8	0.00145115	2
	FER	0.00633496	70579.7	0.0196708	13		KRT33A	0.00628204	12200.6	0.00170377	3		FANCB	0.00867185	15452.7	0.00214572	5
	RPS24	0.00639698	21803.8	0.0026294	2		FER	0.00633496	70579.7	0.0196708	13		MAGED2	0.00870495	56276.4	0.0121647	3
	SERPINF1	0.00639937	17755.5	0.00400804	13		RPS24	0.00639698	21803.8	0.0026294	2		GPD1	0.00873715	43349.9	0.0121666	14
	HOXC12	0.00641224	22528.1	0.00365702	2		SERPINF1	0.00639937	17755.5	0.00400804	13		FARS2	0.00875619	47901.4	0.0097155	7
	CXCR4	0.00644004	3414.46	0.000493853	2		HOXC12	0.00641224	22528.1	0.00365702	2		RAB3D	0.00878887	25920.6	0.00352521	4
	KIF2B	0.00644145	64158.5	0.0183413	20		CXCR4	0.00644004	3414.46	0.000493853	2		PPIH	0.00884201	5447.92	0.00092889	3
	MIS18A	0.00646515	20702.1	0.00306935	6		KIF2B	0.00644145	64158.5	0.0183413	20		KIF1B	0.00889407	20321.3	0.00557396	18
	SLCO1B7	0.0065397	55330	0.0141705	20		MIS18A	0.00646515	20702.1	0.00306935	6		TTC33	0.00893891	12229.1	0.00167062	2
	MLPH	0.00659763	40472.9	0.00947682	19		SLCO1B7	0.0065397	55330	0.0141705	20		GTF3C1	0.00902437	18124.4	0.00578802	16
	ENAM	0.00661023	49828.2	0.0147272	22		MLPH	0.00659763	40472.9	0.00947682	19		LRRC14	0.00914493	8912.25	0.00112928	3
	DSCR4	0.00663817	14917.8	0.00279603	4		DSCR4	0.00663817	14917.8	0.00279603	4		LRRN1	0.00932242	38767.9	0.00803009	10
	ZNF33B	0.00670318	4220.2	0.00113567	7		ZNF33B	0.00670318	4220.2	0.00113567	7		DLGAP4	0.00933995	16286.9	0.00409709	10
	SSX5	0.00677822	18113.2	0.00286223	5		SSX5	0.00677822	18113.2	0.00286223	5		WDR55	0.00944383	40776.6	0.00831051	4
	JPH2	0.00687938	5730.49	0.000784047	6		JPH2	0.00687938	5730.49	0.000784047	6		PARP3	0.00960924	32598.6	0.00840937	14
	RASGEF1C	0.0068887	6457.79	0.00128154	4		ACE2	0.00689327	56014.4	0.0107202	12		EXD3	0.00962715	41488.7	0.0136625	14
	ACE2	0.00689327	56014.4	0.0107202	12		HCN4	0.00697455	39956.2	0.00855929	16		GRIK5	0.00963347	15581.9	0.00295756	5
	FRMD6	0.0069348	28765.5	0.00777104	15		CUEDC1	0.00707537	9070.85	0.00117938	4		CEACAM6	0.00968515	17873.6	0.00308291	3
	HCN4	0.00706901	39961.4	0.00864108	17		ZNF805	0.007099	31415.4	0.00608762	3		2007-03-01	0.00969996	4950.48	0.00125342	6
	ZNF805	0.007099	31415.4	0.00608762	3		ABCC1	0.00710089	55047	0.0208165	37		FITM1	0.00973618	18775.4	0.00347667	6
	CAMSAP1	0.00715127	76541.3	0.0230115	22		CAMSAP1	0.00715127	76541.3	0.0230115	22		FAM178A	0.00975316	12875.2	0.00172335	3
	ABCC1	0.00719336	55618.4	0.021286	40		CCL23	0.00726642	3532.63	0.000473233	3		FBN3	0.00986809	104722	0.0478307	67
	CCL23	0.00726642	3532.63	0.000473233	3		LPA	0.00727649	101645	0.0386947	34		KLHDC8A	0.00997814	4315.91	0.000837728	6
	PTPRH	0.00727459	75980.4	0.0239161	35		FXC1	0.00728063	28570	0.00517075	2		KCNH8	0.0099821	17553.9	0.0025492	5
	FXC1	0.00728063	28570	0.00517075	2		KDM4DL	0.00728834	64851	0.0199739	5		C4orf17	0.0100162	5326.9	0.000609229	2
	KDM4DL	0.00728834	64851	0.0199739	5		TGM1	0.00729078	81140.6	0.0254411	34		SERPINE3	0.0100256	9449.1	0.00173146	4
	TGM1	0.00731159	81245.8	0.0256166	38		YIPF1	0.0074453	25666.1	0.00480853	10		CDH19	0.010028	25728.3	0.00686218	10
	LPA	0.00738588	101791	0.0391514	37		LRRC31	0.00745787	61454.3	0.0178022	18		OR52I1	0.0100954	4519.25	0.000624567	2
	YIPF1	0.0074453	25666.1	0.00480853	10		KRTAP13-2	0.00747559	30579.7	0.00684388	7		HCLS1	0.0101176	49695.6	0.00994264	14
	LRRC31	0.00745787	61454.3	0.0178022	18		SLC44A1	0.00747764	14511.9	0.00332532	11		PDGFD	0.010184	3564.24	0.000665957	3
	KRTAP13-2	0.00747559	30579.7	0.00684388	7		PTPRH	0.00749983	75426.6	0.0237993	33		SYT5	0.0101923	10681.6	0.0024704	7
	RTL1	0.00752224	91363.4	0.0306704	13		RTL1	0.00752224	91363.4	0.0306704	13		IRX2	0.0102082	5836.5	0.00125966	5
	FRMD4B	0.00756459	97847	0.038941	37		FRMD4B	0.00756459	97847	0.038941	37		RPS6KL1	0.0103717	6576.07	0.00102837	5
	ATP6V1C2	0.0076081	17637	0.00443389	12		ATP6V1C2	0.0076081	17637	0.00443389	12		A1CF	0.0105724	46236.1	0.00891151	4
	CECR6	0.00762058	51011.1	0.0111869	5		CECR6	0.00762058	51011.1	0.0111869	5		INS-IGF2	0.0106778	1074.71	0.000188083	2
	SMAD6	0.00762493	44773.8	0.00699969	5		SMAD6	0.00762493	44773.8	0.00699969	5		TMEM106A	0.0107511	8729.48	0.00164605	4
	FAM186B	0.00762718	104252	0.044226	29		FAM186B	0.00762718	104252	0.044226	29		NPC1	0.0108978	47840.2	0.0150026	20
	FAM178B	0.00764294	56220.6	0.0151473	5		FAM178B	0.00764294	56220.6	0.0151473	5		LRRN2	0.0110171	12254.3	0.00177634	5
	CETP	0.00768373	29693.6	0.0093308	13		CETP	0.00768373	29693.6	0.0093308	13		TGIF1	0.0110443	3573.91	0.000733876	3
	IL6	0.00770068	78106.2	0.027516	4		IL6	0.00770068	78106.2	0.027516	4		IGSF11	0.0110862	9268.85	0.00165557	5
	MEOX1	0.00772192	19506.7	0.00491282	10		RAD54L2	0.00778695	33145.8	0.00924098	20		AIFM2	0.0111501	46067.1	0.00975595	10
	RAD54L2	0.00778695	33145.8	0.00924098	20		CTSZ	0.00781419	58619.1	0.0145988	6		DNAH17	0.0113119	49193.8	0.0187532	34
	FRS3	0.00780732	62366	0.0165446	18		CYB561D1	0.00783455	14081.7	0.00218629	6		HEATR7B2	0.0113465	39763.2	0.0133407	19
	CTSZ	0.00781419	58619.1	0.0145988	6		ENAM	0.00797358	47259.7	0.0140262	21		TM2D3	0.0113952	7282.89	0.00128815	5
	SHE	0.00782497	5004.98	0.00112969	7		CC2D1B	0.00804458	50489	0.0175274	25		METTL18	0.0113984	27884.9	0.00574912	3
	CYB561D1	0.00783455	14081.7	0.00218629	6		KCNH3	0.00815154	18698.1	0.00442435	6		EXOSC4	0.0114485	20186.4	0.00287905	4
	PIAS3	0.00800065	18306.5	0.00498224	12		UHMK1	0.00815932	24098	0.00433004	6		PPP1R7	0.0116211	5447.07	0.00120341	4
	NPC1	0.00805499	62819.3	0.0226356	33		LHFPL5	0.00816083	4599.84	0.00105649	5		JAGN1	0.0117711	23564.1	0.00404748	2
	GALNTL4	0.00808395	24916.4	0.00461889	10		GALNTL4	0.00817888	24678.3	0.00449621	9		KIF4B	0.0118247	10658	0.00163893	5
	CC2D1B	0.00808458	50508.2	0.0175741	26		FRS3	0.00822675	61007.4	0.0160394	17		SRRM1	0.0118552	22487.8	0.0038201	4
	KCNH3	0.00815154	18698.1	0.00442435	6		FAM83G	0.00826632	34956.9	0.00964048	17		USP40	0.0118577	35965.5	0.0118659	10
	UHMK1	0.00815932	24098	0.00433004	6		HSD17B13	0.00835984	53799.7	0.0134609	10		NPR1	0.0119964	30262.5	0.00697129	10
	LHFPL5	0.00816083	4599.84	0.00105649	5		AARS2	0.00847362	106296	0.0428822	32		CASP1	0.0120251	15307.8	0.00225772	4
	FAM83G	0.00826632	34956.9	0.00964048	17		USP40	0.00848684	65608.3	0.0223254	28		EPB42	0.0121303	32248.6	0.00555078	6
	HSD17B13	0.00835984	53799.7	0.0134609	10		TAAR5	0.00848869	77006.5	0.0244493	13		SIGLEC15	0.0121746	1963.61	0.000283903	2
	PDGFD	0.00836003	4504.34	0.00101682	6		SPAST	0.00852611	60337.8	0.0130295	9		TOP2A	0.012235	10975.1	0.00260356	6
	MTHFD1L	0.00845489	20605.2	0.00485678	13		TKT	0.00858063	69621	0.0173656	16		EPS15	0.0122791	18203.4	0.00496318	9
	AARS2	0.00847362	106296	0.0428822	32		WDR24	0.00860064	26832.1	0.00717648	10		ADAM30	0.0122827	25218.2	0.00486605	4
	USP40	0.00848684	65608.3	0.0223254	28		LILRB1	0.00867544	3096.55	0.000836672	9		CEACAM5	0.0123764	1098.46	0.000157723	3
	TAAR5	0.00848869	77006.5	0.0244493	13		CELA2A	0.0087213	44304.3	0.00790843	9		FBXO47	0.0124409	10760.9	0.00178122	8
	SPAST	0.00852611	60337.8	0.0130295	9		FARS2	0.00875619	47901.4	0.0097155	7		ASXL2	0.012487	33241	0.00853452	12
	TKT	0.00858063	69621	0.0173656	16		MAGED2	0.0087785	56294.1	0.0122556	5		ERCC8	0.0124935	22781.9	0.00532138	8
	WDR24	0.00860064	26832.1	0.00717648	10		G2E3	0.00881387	56040.1	0.0130505	9		FLT3	0.0127266	30900.3	0.00680677	6
	CELA2A	0.0087213	44304.3	0.00790843	9		GPD1	0.00882027	43405.4	0.0122542	15		COMMD7	0.0127873	1176.98	0.000228374	3
	MAGED2	0.0087785	56294.1	0.0122556	5		ZNF268	0.00883156	38847.6	0.0106877	9		ZNF510	0.0128106	21436.7	0.00387268	6
	G2E3	0.00881387	56040.1	0.0130505	9		PPIH	0.00884201	5447.92	0.00092889	3		CTSL2	0.0129064	5396.89	0.00101063	3
	GPD1	0.00882027	43405.4	0.0122542	15		GUK1	0.00890271	1034.5	0.000152044	2		XIRP1	0.0129811	56793.8	0.0184017	28
	ZNF268	0.00883156	38847.6	0.0106877	9		RAB3D	0.00892661	25943.4	0.00363629	5		SYT14	0.0130021	6745.35	0.00174691	7
	PPIH	0.00884201	5447.92	0.00092889	3		ADAM30	0.0089691	67183.4	0.0175087	17		ZBTB7B	0.0130551	2534.3	0.000420667	2
	ADAM30	0.0089691	67183.4	0.0175087	17		FAM212B	0.00897301	3474.52	0.00084543	7		CPA2	0.013056	7250.68	0.00155092	8
	FAM212B	0.00897301	3474.52	0.00084543	7		KRT4	0.00898198	48893.5	0.0145575	15		RFPL1	0.0130566	4254.15	0.000695237	2
	KRT4	0.00898198	48893.5	0.0145575	15		SERTAD1	0.00898363	16563	0.00266805	3		ASH1L	0.013091	50429.9	0.0172164	18
	SERTAD1	0.00898363	16563	0.00266805	3		THAP3	0.00911653	56232.6	0.01601	8		TTI2	0.0131618	32073.8	0.00483942	2
	NRD1	0.00907237	46569.4	0.0148037	17		GUCA1C	0.00924645	70126.8	0.0200981	5		OR10K2	0.0132014	27160.5	0.00429241	4
	THAP3	0.00911653	56232.6	0.01601	8		IQCF5	0.00927693	19241.6	0.00451645	5		SST	0.0133028	13970	0.00202733	2
	SMTNL2	0.00914967	46741.8	0.013475	17		KCNN2	0.00929704	1199.4	0.000178944	2		HGF	0.0134915	18933.8	0.00341751	3
	GUCA1C	0.00924645	70126.8	0.0200981	5		PLEKHA8	0.00931164	24792.5	0.00464064	7		RYR2	0.0135035	19862	0.00706357	21
	IQCF5	0.00927693	19241.6	0.00451645	5		GRXCR2	0.0093405	13401.2	0.00332005	7		INTS1	0.0137046	52391.5	0.0169354	17
	KCNN2	0.00929704	1199.4	0.000178944	2		SMTNL2	0.00941977	46167.6	0.0131	15		SETDB1	0.0137825	6134.11	0.00147883	7
	PLEKHA8	0.00931164	24792.5	0.00464064	7		EEF2K	0.00948426	37785.8	0.0107886	26		RERG	0.0137953	9089.46	0.00134589	3
	GRXCR2	0.0093405	13401.2	0.00332005	7		PDRG1	0.00948725	3200.61	0.000531743	3		PTPN9	0.0138957	3859.48	0.000498618	2
	PDRG1	0.00948725	3200.61	0.000531743	3		LRRN1	0.00952031	39298.9	0.00855	14		C14orf93	0.0139112	13384.7	0.00306034	4
	LIF	0.00950967	61291	0.0144494	4		POLK	0.00965376	31388.1	0.00975707	19		ESM1	0.0139373	11127.6	0.00229683	3
	LRRN1	0.00952031	39298.9	0.00855	14		SSSCA1	0.00967789	26814	0.00444168	5		HOXB2	0.0139777	23732.8	0.00644131	9
	POLK	0.00965376	31388.1	0.00975707	19		OR52I1	0.00968204	4703.34	0.000718035	3		HEXB	0.0141246	9843.97	0.00194268	5
	RASAL3	0.00967115	37463.5	0.00830178	17		RASAL3	0.00968608	37042.6	0.00784662	14		MTHFD1L	0.0141459	17526.8	0.00432043	9
	SSSCA1	0.00967789	26814	0.00444168	5		TTI2	0.00975991	65981.9	0.0182473	10		GALT	0.014183	18438.5	0.00348926	4
	OR52I1	0.00968204	4703.34	0.000718035	3		C22orf15	0.00976248	13907.4	0.0028308	5		ASIC4	0.0142348	44634.5	0.0130941	11
	RAB3D	0.00968208	25971.5	0.00433578	9		HEATR8	0.00977145	128682	0.048021	46		SSTR1	0.0142475	1248.23	0.000224878	2
	TTI2	0.00975991	65981.9	0.0182473	10		FAT2	0.00980509	269866	0.130595	113		MICAL2	0.0143874	57565.6	0.0200199	23
	C22orf15	0.00976248	13907.4	0.0028308	5		NKAPL	0.00982719	56360.1	0.0145099	12		TAB1	0.0144863	12516.8	0.003981	11
	HEATR8	0.00977145	128682	0.048021	46		USO1	0.00983602	77390.2	0.0252199	21		OR5W2	0.0144994	12464.8	0.00244465	5
	NKAPL	0.00982719	56360.1	0.0145099	12		B3GNT4	0.0100038	8999.5	0.00296826	9		AQP2	0.0146312	1628.14	0.000280424	3
	USO1	0.00983602	77390.2	0.0252199	21		OLFML2A	0.0100685	31978	0.0099064	16		OR52E6	0.0147008	22096.2	0.00629555	8
	B3GNT4	0.0100038	8999.5	0.00296826	9		ARHGAP6	0.0101402	19137	0.00406129	12		NFKBIB	0.0147352	2106.68	0.000403225	2
	TMEM74B	0.0100405	27965.9	0.00592434	6		C20orf166	0.0101736	29307.6	0.00825311	5		PDE6B	0.0147789	24056.5	0.00699252	18
	ARHGAP6	0.0101402	19137	0.00406129	12		CDH5	0.0102151	30012.5	0.00936072	16		CYP4A22	0.0147828	6865.71	0.00104825	2
	C20orf166	0.0101736	29307.6	0.00825311	5		HVCN1	0.0102329	55502.3	0.0106619	4		CENPK	0.0148464	1809.35	0.000368474	3
	HVCN1	0.0102329	55502.3	0.0106619	4		GNL3L	0.0102848	22618.4	0.00391425	8		ZNF18	0.0148599	1199.36	0.000172926	2
	GNL3L	0.0102848	22618.4	0.00391425	8		C16orf92	0.0103711	22911.8	0.00503985	4		PALM2	0.0148938	8310.73	0.0022853	7
	C16orf92	0.0103711	22911.8	0.00503985	4		ACYP2	0.0104124	34893.8	0.00792943	3		MXRA8	0.0151568	21183.2	0.00348205	3
	ACYP2	0.0104124	34893.8	0.00792943	3		WDR55	0.0104191	42488	0.0100398	6		HMHA1	0.0151601	25609.6	0.00512131	4
	WDR55	0.0104191	42488	0.0100398	6		FITM1	0.010463	18810.3	0.00373586	9		BCLAF1	0.0152147	65072.8	0.025004	22
	FITM1	0.010463	18810.3	0.00373586	9		CEACAM6	0.0106022	23102.4	0.00544596	5		TUBA3C	0.0152317	1116.07	0.000182484	2
	EEF2K	0.010536	38745.8	0.0119162	27		RECQL	0.0107258	39797.6	0.0107643	17		ANXA6	0.0152845	9713.72	0.00270243	10
	CEACAM6	0.0106022	23102.4	0.00544596	5		COL9A2	0.0107537	37161.4	0.0129138	21		OR8D1	0.0153347	30979.9	0.00483066	3
	RECQL	0.0107258	39797.6	0.0107643	17		SYT5	0.0108712	10684	0.00259307	8		ARMC3	0.0153608	3927.8	0.00125392	9
	COL9A2	0.0107537	37161.4	0.0129138	21		PLBD1	0.0109693	46372.9	0.0093287	7		NEO1	0.0153706	25962.9	0.00771214	20
	SYT5	0.0108712	10684	0.00259307	8		HNRPLL	0.0110233	2355.92	0.000507218	4		NPFFR2	0.0154089	27508.2	0.00764914	10
	PLBD1	0.0109693	46372.9	0.0093287	7		NOP16	0.011161	34026.5	0.00670954	3		SPTY2D1	0.0155313	17270.5	0.00296536	4
	HNRPLL	0.0110233	2355.92	0.000507218	4		MET	0.0111956	69895.4	0.0229262	23		PCDHGA12	0.0155678	9911.85	0.00146628	3
	NOP16	0.011161	34026.5	0.00670954	3		TJAP1	0.0112734	42498.1	0.0143002	10		AASDHPPT	0.0156388	1006.1	0.000149184	2
	MET	0.0111956	69895.4	0.0229262	23		FAM175B	0.011283	8327.23	0.00179958	5		NXNL2	0.015675	33201.4	0.00631496	3
	TTC21A	0.0112578	39627.8	0.0142041	33		ZNF362	0.0113298	25608.3	0.00589431	4		KCTD8	0.0156939	3705.7	0.000615999	4
	TJAP1	0.0112734	42498.1	0.0143002	10		GRIK5	0.0113605	15635.3	0.00341151	8		NUP88	0.0157348	58057.6	0.0158287	12
	FAT2	0.0112852	271204	0.133133	115		HAUS2	0.011367	19682.9	0.00448339	3		DHTKD1	0.0158316	64743.3	0.0243056	21
	AXIN2	0.0112899	63855.3	0.0254765	27		C1orf216	0.0114054	19867.9	0.00428832	8		AXIN2	0.0158777	34958.1	0.0108684	16
	ZNF362	0.0113298	25608.3	0.00589431	4		DBNL	0.0114316	35143.1	0.00842697	10		LAMA2	0.0159584	76116.1	0.0352332	43
	HAUS2	0.011367	19682.9	0.00448339	3		SERPINA9	0.0114654	53617.4	0.0172809	13		PALB2	0.0159699	39818.2	0.00921993	6
	C1orf216	0.0114054	19867.9	0.00428832	8		MECOM	0.0115517	28829.8	0.00890389	19		MTHFR	0.0159779	18426.7	0.00446018	10
	DBNL	0.0114316	35143.1	0.00842697	10		HCLS1	0.0115552	55102	0.015198	22		STRN3	0.0160251	5356.42	0.00134054	7
	SERPINA9	0.0114654	53617.4	0.0172809	13		EXOSC4	0.0116649	20513.3	0.00319465	6		HELZ	0.0160503	18348.9	0.00486428	13
	MECOM	0.0115517	28829.8	0.00890389	19		DPH2	0.0117062	5550.92	0.00174877	9		CLP1	0.016116	15450.8	0.00263561	4
	HCLS1	0.0115552	55102	0.015198	22		LYSMD1	0.0117104	20470.1	0.00475891	6		TFR2	0.016145	46941.3	0.0160019	13
	ITK	0.0115927	42394.8	0.00984271	12		SF1	0.0117661	3654.14	0.000934952	6		ZNF800	0.0165022	21371.6	0.0034321	5
	CDH5	0.0116224	30070.5	0.0100213	17		JAGN1	0.0117711	23564.1	0.00404748	2		NRD1	0.0165296	29385.2	0.00764327	6
	EXOSC4	0.0116649	20513.3	0.00319465	6		EIF4ENIF1	0.0118707	52497.4	0.0136598	14		NIPAL4	0.0165952	2045.53	0.000417115	3
	DPH2	0.0117062	5550.92	0.00174877	9		IL18RAP	0.0118975	46641	0.010311	11		TRMT5	0.0166538	26299.5	0.00801313	7
	LYSMD1	0.0117104	20470.1	0.00475891	6		SLC24A6	0.0119247	16514.1	0.00466535	13		GPR56	0.0166782	1075.01	0.000343793	2
	SF1	0.0117661	3654.14	0.000934952	6		ATP2B1	0.0120255	11840.1	0.00266772	4		AQP1	0.0166925	26957.2	0.00583535	6
	JAGN1	0.0117711	23564.1	0.00404748	2		CTDP1	0.0120898	16797.1	0.00472579	13		MRPL45	0.0168947	2933.97	0.0010954	8
	EIF4ENIF1	0.0118707	52497.4	0.0136598	14		NPC1	0.0121435	54737.3	0.0202463	32		HCST	0.017008	7360.49	0.00136809	3
	IL18RAP	0.0118975	46641	0.010311	11		NHLRC2	0.0121562	24622.8	0.00680434	14		C8G	0.0170216	19161.8	0.00411739	5
	ATP2B1	0.0119759	12004.8	0.00278456	5		SIGLEC15	0.0121746	1963.61	0.000283903	2		CCNH	0.0170856	11776.7	0.00197776	4
	CDCA2	0.0119903	80506.2	0.032081	31		LPPR3	0.0122244	47000.6	0.0119555	10		TRIM58	0.0171038	35975.6	0.00872977	4
	CTDP1	0.0120898	16797.1	0.00472579	13		SLC39A10	0.0122364	41588.3	0.0104406	9		IFRD2	0.0171553	53535.6	0.0167467	10
	SIGLEC15	0.0121746	1963.61	0.000283903	2		TYSND1	0.012268	16643	0.00554798	12		SEMG2	0.017391	14470.8	0.0041518	8
	LPPR3	0.0122244	47000.6	0.0119555	10		HGF	0.0122787	19870.1	0.00377604	7		HK3	0.0173914	35167.1	0.0109987	24
	NHLRC2	0.0122244	24641.1	0.00682479	15		KCNMB4	0.012286	977.733	0.000146153	2		PLCD1	0.017579	10729.9	0.00321086	8
	SLC39A10	0.0122364	41588.3	0.0104406	9		CD3D	0.0123625	2441.23	0.000438351	3		NUP93	0.0176203	13843.3	0.00421703	10
	TYSND1	0.012268	16643	0.00554798	12		NELL2	0.0124193	35619.7	0.0103495	20		C15orf52	0.017646	35088	0.00759459	2
	HGF	0.0122787	19870.1	0.00377604	7		TBC1D8	0.0124403	56723	0.0201763	24		CD86	0.0176775	900.271	0.000157723	2
	KCNMB4	0.012286	977.733	0.000146153	2		UTS2	0.0124477	22094.6	0.00409448	5		EFCAB5	0.0176782	57457.7	0.0198044	15
	CD3D	0.0123625	2441.23	0.000438351	3		FMNL2	0.0126356	49258.3	0.0144125	14		DAAM1	0.017755	10577.6	0.00204579	6
	NELL2	0.0124193	35619.7	0.0103495	20		LRRN2	0.012651	29896.6	0.0102796	19		FAM184B	0.0178381	37301.9	0.00987232	4
	UTS2	0.0124477	22094.6	0.00409448	5		COMMD7	0.0127873	1176.98	0.000228374	3		C1orf123	0.0180055	26934.8	0.00449058	2
	TBC1D8	0.0125235	56945.1	0.0203983	25		SULF1	0.0128588	77154.5	0.0292517	18		KRTAP13-1	0.0180826	23354.4	0.00581598	4
	SLC24A6	0.012596	16527.1	0.00481459	14		ERCC8	0.0128592	23409.1	0.00591388	11		SERPINA9	0.0181127	37827.8	0.0102355	7
	FMNL2	0.0126356	49258.3	0.0144125	14		C14orf178	0.0129102	2150.57	0.000351663	2		FPR2	0.0181983	34365.4	0.00607585	2
	LRRN2	0.012651	29896.6	0.0102796	19		NPC1L1	0.0129209	79990.3	0.0324162	40		IKZF3	0.0182725	1276.79	0.000268647	2
	COMMD7	0.0127873	1176.98	0.000228374	3		TIGD7	0.0129639	22470.2	0.00694185	14		BBS12	0.0183097	46079.3	0.0126578	6
	SULF1	0.0128588	77154.5	0.0292517	18		ZNF595	0.0129818	2652.38	0.000627935	3		ARID2	0.018348	15640	0.00464451	13
	ERCC8	0.0128592	23409.1	0.00591388	11		ST14	0.0130093	50776.7	0.0211837	20		RNF217	0.0183829	22437.6	0.00356942	2
	C14orf178	0.0129102	2150.57	0.000351663	2		UMODL1	0.0131283	108415	0.0539624	57		B3GNT3	0.0184571	45295.2	0.0106525	3
	TIGD7	0.0129639	22470.2	0.00694185	14		CCDC64B	0.0131857	23736.6	0.00760343	6		ZNF624	0.0185612	1289.98	0.00018694	2
	UMODL1	0.0131283	108415	0.0539624	57		KLHDC8A	0.013203	4366.03	0.00104833	9		CDH18	0.0187194	10970	0.00297427	9
	CCDC64B	0.0131857	23736.6	0.00760343	6		MT1F	0.0132768	20120.1	0.00473391	2		EIF3G	0.0188263	1053.52	0.000224467	3
	KLHDC8A	0.013203	4366.03	0.00104833	9		SST	0.0133028	13970	0.00202733	2		GPR75	0.0188278	22311.7	0.00449142	8
	MT1F	0.0132768	20120.1	0.00473391	2		BASP1	0.0133136	34359.8	0.00630331	3		UIMC1	0.0189023	25611.8	0.00438718	4
	SST	0.0133028	13970	0.00202733	2		SP140L	0.0135062	22487.5	0.00511499	10		MTNR1B	0.0189541	14860	0.00341187	6
	BASP1	0.0133136	34359.8	0.00630331	3		RBPJL	0.0135264	58542.8	0.0184954	16		CYP4A11	0.0189547	5260.11	0.00109594	3
	SP140L	0.0135062	22487.5	0.00511499	10		ZBTB7B	0.0136981	2846.4	0.000665985	5		MFI2	0.0189707	42564.2	0.0131415	21
	RBPJL	0.0135264	58542.8	0.0184954	16		CACNA1G	0.0137289	58382.7	0.0216524	20		SLC25A44	0.0189887	6755.54	0.00103144	2
	SMPD4	0.013611	5776.68	0.000753671	2		SLC41A1	0.0137512	3879.77	0.000803491	4		RNF111	0.0190624	12573.6	0.00439751	11
	NPC1L1	0.0136285	79993.6	0.0329165	41		PRDM1	0.0137731	56841.8	0.01941	14		CEP85	0.0191241	23464.8	0.0048623	6
	ZBTB7B	0.0136981	2846.4	0.000665985	5		ESM1	0.0137953	13660.5	0.00336588	4		HOXD8	0.0191647	7844.73	0.00117417	3
	SLC41A1	0.0137512	3879.77	0.000803491	4		RERG	0.0137953	9089.46	0.00134589	3		DSN1	0.0194453	2172.56	0.000297924	2
	ST14	0.0137925	51426.2	0.0227036	24		OR8H1	0.0139105	14257.9	0.00298509	6		GNAI3	0.0194643	4288.51	0.00105966	5
	ESM1	0.0137953	13660.5	0.00336588	4		CLDN20	0.0139215	23057.7	0.00631434	10		KIF11	0.0195511	3137	0.000832651	4
	RERG	0.0137953	9089.46	0.00134589	3		DDX60L	0.0139304	68015.6	0.0261644	40		OR4D5	0.0195691	23038.9	0.00680947	8
	PRDM1	0.0139083	56875.4	0.019512	15		OPTN	0.0139576	16666.8	0.0029787	7		AURKC	0.0196031	4134.9	0.000854905	2
	OR8H1	0.0139105	14257.9	0.00298509	6		FAM111A	0.014005	41538.3	0.0132058	16		DENND5A	0.019626	6974.97	0.00209792	11
	CLDN20	0.0139215	23057.7	0.00631434	10		OR52E6	0.0140843	39126.8	0.0151796	15		FRS3	0.0197194	38613.2	0.00989723	9
	DDX60L	0.0139292	68041.1	0.0261819	41		MTHFD1L	0.0141082	17591	0.00435437	10		FAM3B	0.0198185	7094.78	0.00136114	3
	OPTN	0.0139576	16666.8	0.0029787	7		UIMC1	0.0141332	36177.1	0.00972335	17		NWD1	0.0199134	67951	0.0263843	18
	ZNF595	0.0139659	2664.3	0.000671713	4		SART3	0.0141576	12403.2	0.00434068	15		KHDRBS2	0.0199492	12618.7	0.00283108	4
	UBR4	0.0139706	72472.1	0.0298227	69		UEVLD	0.0141855	11901.2	0.00343867	12		CRTAM	0.0201182	27586	0.00863232	5
	FAM111A	0.014005	41538.3	0.0132058	16		SNRPA1	0.0142005	7232.2	0.00136849	4		REV3L	0.0201457	44190.5	0.0156521	20
	OR52E6	0.0140843	39126.8	0.0151796	15		UBR4	0.0142047	69041.9	0.0276919	63		PHF20	0.0203355	14028.6	0.00235832	3
	PPME1	0.0141296	32465.2	0.00544319	7		NPR1	0.0142163	30769.6	0.00829523	13		KIAA1797	0.020372	51701.9	0.0208309	30
	UIMC1	0.0141332	36177.1	0.00972335	17		PIK3R4	0.0142239	51031.1	0.0163016	18		DDX54	0.0204211	38619.9	0.0155256	19
	SART3	0.0141576	12403.2	0.00434068	15		SLC16A9	0.0142282	27427.6	0.00420077	2		SSPN	0.0205161	5735.08	0.00121507	3
	UEVLD	0.0141855	11901.2	0.00343867	12		ABCA5	0.0142678	69668.7	0.0234221	33		CHRNA1	0.020559	16632.1	0.00438	6
	NPR1	0.0142163	30769.6	0.00829523	13		HOXB2	0.0143593	23766.3	0.00655814	10		DDX60L	0.0205762	29536.8	0.0114231	18
	PIK3R4	0.0142239	51031.1	0.0163016	18		RFXANK	0.014413	11519.5	0.0031673	8		MPP4	0.020645	3290.5	0.00090015	5
	SLC16A9	0.0142282	27427.6	0.00420077	2		CTSL2	0.0144805	5408.14	0.00113646	4		MBD4	0.0206497	33681.9	0.0104352	6
	HOXB2	0.0143593	23766.3	0.00655814	10		TAB1	0.0144863	12516.8	0.003981	11		SS18	0.0207211	28711.1	0.00816725	5
	RFXANK	0.014413	11519.5	0.0031673	8		CPNE5	0.0145515	22836.7	0.00504953	11		TSPAN15	0.0210004	18458.8	0.00506582	7
	CTSL2	0.0144805	5408.14	0.00113646	4		CRAMP1L	0.0145633	57532.7	0.0192079	14		AARS2	0.0210723	45674.8	0.0152956	18
	TAB1	0.0144863	12516.8	0.003981	11		AQP2	0.0146312	1628.14	0.000280424	3		VPS53	0.0211533	28908.3	0.00739194	6
	CPNE5	0.0145515	22836.7	0.00504953	11		RGS9	0.0146455	28789.8	0.00859536	13		FAM102A	0.0212284	12828.7	0.00228093	3
	CRAMP1L	0.0145633	57532.7	0.0192079	14		RAB38	0.014882	48440.3	0.0125121	7		KCNQ3	0.0212789	23280.6	0.00465883	4
	AQP2	0.0146312	1628.14	0.000280424	3		LIF	0.014934	44365.2	0.0092848	3		ABCC1	0.0213163	35382.5	0.0150562	24
	ABCA5	0.0146348	69749	0.0237492	34		C14orf135	0.0149382	62544	0.0247016	26		DYNC1LI1	0.0213265	25175.9	0.00624006	5
	RGS9	0.0146455	28789.8	0.00859536	13		BGN	0.0149822	1273.49	0.000230646	3		TAS2R5	0.021357	21490.6	0.00530544	4
	RAB38	0.014882	48440.3	0.0125121	7		CCDC64	0.0150443	3170.06	0.000554776	3		SCUBE2	0.0216571	8300.5	0.00292044	15
	C14orf135	0.0149382	62544	0.0247016	26		MXRA8	0.0151568	21183.2	0.00348205	3		VDR	0.0217823	19833.4	0.00494193	8
	BGN	0.0149822	1273.49	0.000230646	3		TUBA3C	0.0152317	1116.07	0.000182484	2		CETP	0.0217832	8292.81	0.00194529	5
	CCDC64	0.0150443	3170.06	0.000554776	3		SLCO2A1	0.0153598	45195.7	0.0151582	25		MBOAT2	0.0218453	16151.3	0.00300045	4
	MXRA8	0.0151568	21183.2	0.00348205	3		GALT	0.0154325	18550.9	0.0038887	6		KRT4	0.0218601	36284.8	0.0104488	12
	SLCO2A1	0.0153598	45195.7	0.0151582	25		KIAA0430	0.0154521	60094.2	0.0205455	20		PSMB6	0.0219145	1859.03	0.00040954	2
	SMARCD2	0.0154301	27033.6	0.00764514	4		NUP88	0.0155325	59310.6	0.0165941	15		C14orf135	0.0219212	18110.4	0.00547847	11
	GALT	0.0154325	18550.9	0.0038887	6		CHRD	0.0155431	23187.1	0.00816475	18		ZNF521	0.0220696	9017	0.00285347	10
	KIAA0430	0.0154521	60094.2	0.0205455	20		LINGO3	0.0155942	6027.82	0.00120901	2		CHKA	0.0220905	2474.46	0.000543271	3
	NUP88	0.0155325	59310.6	0.0165941	15		CEP70	0.0156122	36420.2	0.0118611	17		SLAMF1	0.0221182	13156.3	0.00298701	2
	CHRD	0.0155431	23187.1	0.00816475	18		CCDC27	0.0156662	79481.4	0.0344119	27		PKNOX1	0.0221425	8806.05	0.00240745	6
	LINGO3	0.0155942	6027.82	0.00120901	2		RP9	0.0156714	863.406	0.00014022	2		ISX	0.0222107	21498	0.00543156	5
	CEP70	0.0156122	36420.2	0.0118611	17		NXNL2	0.015675	33201.4	0.00631496	3		POMC	0.0222527	11904.2	0.00363777	5
	RP9	0.0156714	863.406	0.00014022	2		DIS3L	0.0157443	59075.6	0.0178836	23		RPTOR	0.0222792	30608.9	0.00745825	10
	NXNL2	0.015675	33201.4	0.00631496	3		SGMS2	0.0157992	6225.56	0.00111955	4		CDCA2	0.0223563	37631.7	0.011464	10
	DIS3L	0.0157443	59075.6	0.0178836	23		TAF1B	0.0158316	31386.4	0.00961865	12		RBP2	0.0224278	870.42	0.000146082	2
	SGMS2	0.0157992	6225.56	0.00111955	4		DBR1	0.0158328	32898.9	0.00913241	13		APBB3	0.0224499	30129.9	0.00866925	8
	TAF1B	0.0158316	31386.4	0.00961865	12		ACR	0.0158353	1841.14	0.000321303	3		KDM3A	0.0224635	14463	0.00244647	5
	DBR1	0.0158328	32898.9	0.00913241	13		PLCL1	0.0159307	32998.5	0.00920516	12		GSTM2	0.0226226	759.843	0.000146051	2
	ACR	0.0158353	1841.14	0.000321303	3		A2LD1	0.015962	9738.76	0.00239104	2		TYK2	0.0226722	45021.6	0.0126449	16
	DAO	0.0158727	16465	0.00404883	10		AASDHPPT	0.0159674	1006.18	0.000155448	3		SP7	0.0227311	4454.76	0.000861332	6
	PLCL1	0.0159307	32998.5	0.00920516	12		ZFHX3	0.0160395	133409	0.0770416	78		C9orf156	0.0229473	5441.72	0.00111819	4
	A2LD1	0.015962	9738.76	0.00239104	2		CLP1	0.016116	15450.8	0.00263561	4		FAM167A	0.0229501	6329.54	0.00146446	5
	AASDHPPT	0.0159674	1006.18	0.000155448	3		ARHGEF38	0.0161176	22558.4	0.0062827	8		CPSF7	0.0230425	2916.45	0.000585762	3
	ARHGEF38	0.0161243	22565.2	0.00628854	9		CLEC4F	0.0162445	111685	0.0464233	27		EHBP1L1	0.0230593	32589	0.0100034	10
	WSB1	0.0162567	6751.13	0.00194436	7		WSB1	0.0162567	6751.13	0.00194436	7		NELL2	0.0232288	15596.6	0.00364247	12
	NUP210	0.0162824	83546.2	0.0332872	47		NUP210	0.0162824	83546.2	0.0332872	47		RBM12	0.0232619	2183.41	0.000523179	5
	KCNQ3	0.0163624	28811.9	0.00726067	11		ZNF496	0.0163735	8070.02	0.00246197	11		ZNF311	0.0232869	3089.26	0.000779734	4
	ZNF496	0.0163735	8070.02	0.00246197	11		HEATR7B2	0.0163773	53000.7	0.0235712	41		SPATA12	0.0232915	1899	0.00037979	2
	CPA2	0.0163831	39715.5	0.0117421	11		CPA2	0.0163831	39715.5	0.0117421	11		TMOD3	0.0234059	5939.45	0.00150139	6
	HK3	0.0164247	49615.8	0.018944	40		GPR75	0.0164319	25390.4	0.00597531	13		FSIP2	0.0234076	4376.34	0.000660433	2
	GPR75	0.0164319	25390.4	0.00597531	13		FAM101A,ZNF664-FAM101A	0.0164851	11865.5	0.00231424	3		ACP6	0.0234212	34013.1	0.00857301	9
	CLEC4F	0.0164408	111739	0.0466736	28		ZNF334	0.0165002	24855.4	0.0083437	17		TEX264	0.0235379	1936.12	0.000338892	2
	FAM101A,ZNF664-FAM101A	0.0164851	11865.5	0.00231424	3		KANK1	0.0165873	90896.2	0.0386332	42		TYSND1	0.0235429	13592.1	0.00471202	7
	ZNF334	0.0165002	24855.4	0.0083437	17		BEND3	0.016676	12710.1	0.00403932	11		POLK	0.0235645	21603.1	0.00655515	13
	SNRPA1	0.0166451	7232.25	0.00162712	5		SLC26A2	0.0167665	58834.8	0.018297	18		RP1L1	0.0236561	47108.5	0.0195734	34
	BEND3	0.016676	12710.1	0.00403932	11		DHTKD1	0.0167924	68065.9	0.0269295	24		PPIF	0.0237713	1714.58	0.000361064	3
	CLP1	0.0167195	15491.5	0.00314499	6		ABCC2	0.0167982	102559	0.0510214	44		MLLT3	0.023799	3548.96	0.000601786	2
	ZFHX3	0.0167523	134153	0.0781647	85		ING1	0.0168176	26641.3	0.00837678	8		DGKG	0.0238089	26444	0.00790066	16
	SLC26A2	0.0167665	58834.8	0.018297	18		FILIP1L	0.0168576	23160.1	0.00931092	22		POLI	0.0239296	23179.5	0.00619155	9
	DHTKD1	0.0167924	68065.9	0.0269295	24		MTMR3	0.0168673	36852.5	0.0141525	26		PLEKHA8	0.0240198	17792.1	0.00364172	6
	ABCC2	0.0167982	102559	0.0510214	44		MIIP	0.0169582	39255.3	0.0121299	17		LILRA6	0.0241788	1924.76	0.000374173	2
	ING1	0.0168176	26641.3	0.00837678	8		HCST	0.017008	7360.49	0.00136809	3		OR10H3	0.024218	23508.8	0.0067109	5
	FILIP1L	0.0168576	23160.1	0.00931092	22		HBEGF	0.0170095	18683.7	0.00282405	4		FAM176B	0.0243409	12051.8	0.00216443	2
	MTMR3	0.0168673	36852.5	0.0141525	26		OMA1	0.0170644	63032.9	0.0243004	15		OR12D2	0.0244497	46121.8	0.0166339	7
	HCST	0.017008	7360.49	0.00136809	3		TRIM58	0.017084	39558.3	0.011397	11		UBAP2	0.0245267	23407.4	0.00976023	23
	HBEGF	0.0170095	18683.7	0.00282405	4		PDGFD	0.0173026	3788.73	0.00093467	5		DPH2	0.0245422	2344.12	0.000556005	3
	OMA1	0.0170644	63032.9	0.0243004	15		NPFFR2	0.0173411	32159.8	0.0115888	25		PM20D2	0.0245485	3326.71	0.00110587	4
	TRIM58	0.017084	39558.3	0.011397	11		KCNQ3	0.0173537	27882	0.00689253	10		OR14I1	0.0245745	2539.75	0.000677876	4
	MIIP	0.0172802	39290.3	0.0122644	18		CASS4	0.0174212	51179.8	0.0192211	21		EMP1	0.0247303	15564	0.00338256	5
	NPFFR2	0.0173411	32159.8	0.0115888	25		ATG16L1	0.0174489	11709.2	0.00264565	6		ASPG	0.0247359	10302.1	0.00284589	5
	CASS4	0.0174212	51179.8	0.0192211	21		HK3	0.017698	48885.4	0.0188622	39		RAB38	0.0247849	34617.5	0.0072082	2
	ATG16L1	0.0174489	11709.2	0.00264565	6		FPR2	0.017739	35840.5	0.00695244	5		CORIN	0.025084	62044.3	0.0179806	20
	ZYG11B	0.01752	2908.65	0.000502378	3		METTL18	0.0177486	34153.1	0.0104034	10		ZNF846	0.0250911	1407.84	0.000395741	5
	TSTA3	0.0176793	9419.99	0.00230566	7		ARNT	0.0177569	53324.3	0.0179235	9		RTN2	0.0251297	1530.47	0.00038558	3
	FPR2	0.017739	35840.5	0.00695244	5		OR52E8	0.0177875	40975.2	0.0111576	5		PHF19	0.0251714	18894.2	0.00368689	4
	METTL18	0.0177486	34153.1	0.0104034	10		REV3L	0.0179064	60268.2	0.026552	53		C4orf34	0.0251955	1795.08	0.000397292	3
	ARNT	0.0177569	53324.3	0.0179235	9		MED7	0.0179344	15589.9	0.003137	4		HMGCR	0.0252259	5635.81	0.00106729	4
	OR52E8	0.0177875	40975.2	0.0111576	5		TREH	0.0179689	50744.8	0.0182354	17		UBAP2L	0.0252456	12404.3	0.00347539	6
	REV3L	0.0179161	60304.4	0.0265887	54		C1orf123	0.0180055	26934.8	0.00449058	2		LRRC37A3	0.0252685	23714.8	0.00530519	2
	KANK1	0.0179185	92418	0.0409679	49		KCNH1	0.0180066	5216.7	0.00136447	5		STK31	0.0255261	46174	0.0149148	11
	MED7	0.0179344	15589.9	0.003137	4		FEZF2	0.0180305	3349.81	0.000529793	2		ZNF296	0.0255461	991.23	0.000201256	3
	TREH	0.0179689	50744.8	0.0182354	17		KRTAP13-1	0.0180826	23354.4	0.00581598	4		GCC1	0.0255708	36073.8	0.0126373	9
	C1orf123	0.0180055	26934.8	0.00449058	2		GSTK1	0.0180955	35312.3	0.00800546	9		TRAPPC12	0.0255856	17463.7	0.00443685	9
	KCNH1	0.0180066	5216.7	0.00136447	5		HS3ST4	0.0181429	40545.3	0.0102466	3		GAL3ST4	0.0256656	40923.7	0.0159513	10
	FEZF2	0.0180305	3349.81	0.000529793	2		CLDN22	0.018205	1763.73	0.000240541	2		MCM7	0.0257306	19642.6	0.0071342	17
	KRTAP13-1	0.0180826	23354.4	0.00581598	4		CCDC63	0.0183006	56774	0.0214091	22		PSMC5	0.0257878	5939.69	0.00114289	2
	GSTK1	0.0180955	35312.3	0.00800546	9		ZNF425	0.0183743	48003.2	0.0152519	18		EVI5	0.0258045	28008.2	0.00806996	10
	CSNK2A2	0.0181371	4762.51	0.000747742	2		TFR2	0.0184329	47830.3	0.0176023	21		COL9A2	0.0258294	18666.5	0.00630871	13
	HS3ST4	0.0181429	40545.3	0.0102466	3		TNRC6C	0.0184597	34932	0.0134845	24		RPN1	0.0258327	22684.7	0.00755177	9
	CLDN22	0.018205	1763.73	0.000240541	2		EIF3G	0.0188263	1053.52	0.000224467	3		SHROOM3	0.0258357	51267.7	0.0178012	19
	ZNF425	0.0183743	48003.2	0.0152519	18		ZMYND12	0.0188905	31811.3	0.00664753	8		LRMP	0.0258815	3193.64	0.000889803	4
	TFR2	0.0184329	47830.3	0.0176023	21		MMS22L	0.0188975	27393.7	0.0123664	34		TRIM6	0.0259033	4119.7	0.000913399	4
	TNRC6C	0.0184597	34932	0.0134845	24		CHCHD2	0.018914	14765.9	0.00239644	3		SNCG	0.0259114	7359.17	0.00124087	2
	SCNN1B	0.0185507	39479.8	0.013984	21		RPS6KL1	0.0189391	18318.7	0.00493559	13		GTF2E2	0.0260523	28499.3	0.00596258	4
	ZMYND12	0.0188905	31811.3	0.00664753	8		SLC25A44	0.0189887	6755.54	0.00103144	2		DNLZ	0.0261596	10175.7	0.00191893	2
	MMS22L	0.0188975	27393.7	0.0123664	34		SCNN1B	0.0190351	39033.2	0.0137912	20		ZCCHC16	0.0263	1450.68	0.000220075	2
	CHCHD2	0.018914	14765.9	0.00239644	3		IZUMO4	0.0190394	25210	0.00772638	13		SLC5A12	0.0266014	2783.68	0.00106489	7
	RPS6KL1	0.0189391	18318.7	0.00493559	13		BCORL1	0.0190509	47227.6	0.0116768	16		OR7G3	0.0266043	81017.2	0.0262372	5
	SLC25A44	0.0189887	6755.54	0.00103144	2		HOXD8	0.0191647	7844.73	0.00117417	3		MEI1	0.0266198	6163.08	0.00218056	7
	IZUMO4	0.0190394	25210	0.00772638	13		CRTAM	0.0193084	34488.7	0.0118861	8		TMEM200B	0.0266504	3540.01	0.00104885	2
	BCORL1	0.0190509	47227.6	0.0116768	16		FLT1	0.019322	38924.9	0.0125469	21		LMOD2	0.0267868	18732.5	0.00449274	4
	HOXD8	0.0191647	7844.73	0.00117417	3		COL12A1	0.0193729	92413.4	0.0457125	55		OR9K2	0.026819	12906.4	0.00389135	7
	FLT1	0.0192291	39179.9	0.0127163	22		ZDHHC3	0.0193969	42192.1	0.00930996	4		SCRG1	0.0268518	1284.24	0.000216411	2
	OLFML2A	0.019247	32140.1	0.0117869	17		A1CF	0.0194037	56803.9	0.0188384	5		BICD1	0.0268671	3607.81	0.00101104	6
	CRTAM	0.0193084	34488.7	0.0118861	8		TPSD1	0.0194107	23587.3	0.00640511	7		POLR1A	0.0268997	15224.5	0.00353205	9
	COL12A1	0.0193729	92413.4	0.0457125	55		OR10K2	0.0194175	55441.5	0.013708	12		NOL8	0.026942	19538.4	0.00635787	13
	ZDHHC3	0.0193969	42192.1	0.00930996	4		CHN2	0.0194457	26731.1	0.00661357	8		RRP9	0.0269519	49457.7	0.0149112	9
	A1CF	0.0194037	56803.9	0.0188384	5		GNAI3	0.0194643	4288.51	0.00105966	5		CCDC88B	0.0270297	25013.5	0.00773943	13
	TPSD1	0.0194107	23587.3	0.00640511	7		CYSLTR1	0.019519	6515.92	0.00124221	3		PAPPA2	0.0272193	16230	0.00490616	18
	OR10K2	0.0194175	55441.5	0.013708	12		AURKC	0.0196031	4134.9	0.000854905	2		B4GALT7	0.0273312	19294.1	0.00488141	7
	CHN2	0.0194457	26731.1	0.00661357	8		RAB36	0.019605	21784	0.00586883	11		NAPRT1	0.0273333	31677.7	0.00768479	9
	CYSLTR1	0.019519	6515.92	0.00124221	3		GATA5	0.0196082	1271.83	0.000299896	4		RND1	0.0274078	4549.96	0.00112586	5
	AURKC	0.0196031	4134.9	0.000854905	2		FAM3B	0.0196336	7486.69	0.00162097	5		NAALAD2	0.0274941	34620.6	0.0097634	8
	RAB36	0.019605	21784	0.00586883	11		OR5W2	0.0196357	13159.5	0.0035784	10		SPP1	0.0275548	15871.7	0.00390522	5
	GATA5	0.0196082	1271.83	0.000299896	4		TNFSF15	0.0197067	8717.69	0.00324319	4		PARVG	0.0275556	19247.7	0.00705829	5
	FAM3B	0.0196336	7486.69	0.00162097	5		DGKG	0.0198095	31053.9	0.010558	26		ALPPL2	0.0275951	8358.17	0.0018023	5
	TNFSF15	0.0197067	8717.69	0.00324319	4		B3GNT3	0.0198379	46004.5	0.0118797	8		ZMAT4	0.0276013	1991.54	0.000408188	2
	SAPCD1	0.0198091	59371.5	0.0290802	12		DLGAP5	0.0198716	45002.5	0.016684	18		GMEB2	0.0276487	392.998	8.20842e-05	2
	DGKG	0.0198095	31053.9	0.010558	26		TLL1	0.0199351	13022.1	0.00420705	13		C9orf11	0.0276499	5395.56	0.00169933	8
	B3GNT3	0.0198379	46004.5	0.0118797	8		LRRIQ3	0.01996	57697.4	0.0248569	22		RFXANK	0.0276663	5224.45	0.00117948	4
	DLGAP5	0.0198716	45002.5	0.016684	18		ZNF800	0.0199991	21807.3	0.00456722	8		ST6GALNAC5	0.0277907	3379.46	0.000545523	2
	LRRIQ3	0.01996	57697.4	0.0248569	22		SLC39A12	0.0200035	40841.2	0.0130715	15		WISP1	0.0277946	13469.1	0.00340487	10
	ZNF800	0.0199991	21807.3	0.00456722	8		GPR97	0.0200153	68530.3	0.019696	11		ARHGAP18	0.0278075	3585.32	0.00104155	3
	SLC39A12	0.0200035	40841.2	0.0130715	15		TMTC2	0.0200491	58303.7	0.0239043	21		ZNF80	0.0279039	20511.8	0.006603	3
	GPR97	0.0200153	68530.3	0.019696	11		EXTL2	0.0202741	7933.65	0.00241795	9		PTPN13	0.0281059	63883.9	0.0337974	33
	TMTC2	0.0200491	58303.7	0.0239043	21		CYP4A11	0.0203065	5313.52	0.00119141	6		PHACTR4	0.0281446	21016.3	0.00593935	10
	EXTL2	0.0202741	7933.65	0.00241795	9		GZMM	0.020329	84299.9	0.0369728	14		SMAD1	0.0281457	2594.76	0.00046737	3
	CYP4A11	0.0203065	5313.52	0.00119141	6		ASPG	0.0204107	11782.6	0.00359629	10		OR5V1	0.0281834	19975.5	0.00946927	4
	GZMM	0.020329	84299.9	0.0369728	14		LMLN	0.0205059	23334	0.00762999	2		PPP1R12A	0.0282138	6303.56	0.00192754	6
	LMLN	0.0205059	23334	0.00762999	2		TAS2R60	0.0205188	6566.91	0.00145819	7		RET	0.0282337	28149.3	0.0088773	10
	TAS2R60	0.0205188	6566.91	0.00145819	7		JUP	0.020572	5551.66	0.00217004	13		PRPF4B	0.0282829	20408.6	0.00472221	5
	C2orf80	0.0206602	35937.6	0.00872356	9		LTBP2	0.0206408	52265	0.0239536	51		INPP5B	0.0284258	5399.39	0.00158357	5
	USH2A	0.0207189	219604	0.132762	163		C2orf80	0.0206602	35937.6	0.00872356	9		2014-09-01	0.0284732	25522.3	0.00875699	5
	SS18	0.0207211	28711.1	0.00816725	5		ARID2	0.0207045	24593.7	0.0086727	22		GUCY2F	0.0285255	58743.7	0.0216548	18
	ASPG	0.020729	11853.5	0.00369398	11		SS18	0.0207211	28711.1	0.00816725	5		RNASE7	0.0286469	3549.82	0.000623537	3
	SGK223	0.0207834	110075	0.0503061	42		PRKCB	0.0208553	12228	0.00324341	6		B3GALT1	0.0287185	410.844	6.74853e-05	2
	PRKCB	0.0208553	12228	0.00324341	6		VPS53	0.0209265	29057.2	0.00743868	7		MAL	0.0287554	3084.37	0.000785147	3
	VPS53	0.0209265	29057.2	0.00743868	7		AFMID	0.02104	30873	0.00899157	9		MRPS24	0.0287795	17280.2	0.00325795	3
	AFMID	0.02104	30873	0.00899157	9		PDGFRL	0.0210576	59968.6	0.023095	20		FCRL6	0.0288618	14005.4	0.00338238	5
	PDGFRL	0.0210576	59968.6	0.023095	20		PPIF	0.0211854	1779.33	0.000366906	4		AVIL	0.0289387	34117.5	0.0116191	21
	PPIF	0.0211854	1779.33	0.000366906	4		CCDC167	0.0211879	5537.45	0.00088801	2		TEKT1	0.0291291	10666.6	0.00355631	10
	CCDC167	0.0211879	5537.45	0.00088801	2		PRKDC	0.0212315	119914	0.0620323	56		COG3	0.0291627	30825.7	0.00883888	8
	PRKDC	0.0212739	119921	0.0620636	58		TSTA3	0.0212628	7989.05	0.00177936	6		KIAA1161	0.0293059	8103.15	0.00227559	5
	MARS	0.0213501	43221.3	0.0131697	21		MARS	0.0213501	43221.3	0.0131697	21		C1QTNF8	0.0293648	27334.9	0.00749976	4
	GSTA2	0.0213854	2980.56	0.000614697	3		GSTA2	0.0213854	2980.56	0.000614697	3		NPR2	0.0294067	2842.34	0.000788695	6
	LAMA2	0.0214129	141455	0.0752474	81		SERPINB6	0.0214373	10349.1	0.00289743	9		DPP8	0.0295854	7788.74	0.00206436	6
	SERPINB6	0.0214373	10349.1	0.00289743	9		FAM102A	0.0215659	12885	0.00236271	4		CCDC136	0.0299163	18882.2	0.00562185	6
	EHBP1L1	0.0214846	39962.9	0.015038	20		FBN2	0.0215784	122600	0.0623119	57		CD163L1	0.0300316	18330	0.00612498	13
	FAM102A	0.0215659	12885	0.00236271	4		PHF19	0.021638	22155.5	0.00538594	9		CAMTA1	0.0300799	14749	0.00440774	12
	CACNA1G	0.0215938	58416.9	0.0261399	21		EHBP1L1	0.021692	39765.3	0.014962	19		PELP1	0.0300834	6525.68	0.00132465	4
	FAM181A	0.0217343	33584.7	0.0111662	10		FAM181A	0.0217343	33584.7	0.0111662	10		MYT1	0.0300925	12975.3	0.00367828	8
	PHF19	0.021815	22177.6	0.00547711	10		CCL19	0.0218473	2287.33	0.000397302	2		C12orf23	0.0300986	2364.08	0.000488495	2
	TMC7	0.0218347	75603.2	0.0324745	17		USH2A	0.02185	215465	0.128212	158		CDC42BPA	0.0301194	10979.1	0.0029701	10
	CCL19	0.0218473	2287.33	0.000397302	2		HSPB6	0.0219094	5484.39	0.00110528	4		ELK1	0.0301627	1140.01	0.000171387	2
	HSPB6	0.0219094	5484.39	0.00110528	4		ASIC4	0.021928	45873.2	0.0171079	15		BST1	0.0301957	9114.87	0.00207624	5
	ASIC4	0.021928	45873.2	0.0171079	15		CLCA1	0.0219916	42501	0.0144355	18		TCTE1	0.0303038	19758.9	0.00652317	12
	GPSM1	0.0219356	41028.9	0.013007	11		RG9MTD3	0.0220397	33983.5	0.0108766	4		LETM2	0.0305498	27352.7	0.00936372	10
	CLCA1	0.0219916	42501	0.0144355	18		AQP1	0.0220778	27280.4	0.00726714	8		GPR21	0.0305857	2426.77	0.000449809	2
	RG9MTD3	0.0220397	33983.5	0.0108766	4		MTHFR	0.0220789	31312.6	0.0078198	14		XKR6	0.0306165	1244.62	0.000340712	5
	AQP1	0.0220778	27280.4	0.00726714	8		LAMA2	0.0221058	137270	0.0702007	77		ZNF592	0.0309089	3151.45	0.000724327	5
	MAMSTR	0.0221412	27587.4	0.00605671	4		MAMSTR	0.0221412	27587.4	0.00605671	4		HAPLN1	0.0309265	3441.15	0.000662699	4
	PKNOX1	0.0221425	8806.05	0.00240745	6		PKNOX1	0.0221425	8806.05	0.00240745	6		SNRPA1	0.0309564	5113.43	0.000965345	2
	OR4E2	0.0221446	27502.3	0.00776514	14		OR4E2	0.0221446	27502.3	0.00776514	14		PGLYRP3	0.0309588	34302.7	0.0110739	12
	ISX	0.022203	21694.1	0.00559484	7		DLGAP4	0.0221699	21221.7	0.00692048	14		SMYD5	0.0310123	19681.7	0.00434984	5
	ARID2	0.022296	24827.5	0.00938564	25		ISX	0.022203	21694.1	0.00559484	7		RASAL2	0.0310334	3689.52	0.00112129	7
	C1orf50	0.0223032	19759.7	0.00575508	7		SGK223	0.0222583	108163	0.0499907	41		IFRD1	0.0310554	3220.23	0.00088805	6
	OR10H3	0.0224122	25817.4	0.00805952	8		C1orf50	0.0223032	19759.7	0.00575508	7		RIOK1	0.0310821	33867.2	0.00925952	7
	KCTD3	0.0224414	36488.1	0.0138092	7		OR10H3	0.0224122	25817.4	0.00805952	8		CDH24	0.0311468	13795.8	0.00363662	6
	LTBP2	0.0224509	52401.8	0.0246083	52		OR8D1	0.0225024	34632.7	0.00871024	8		USP32	0.0311498	9084.75	0.00340469	10
	OR8D1	0.0225024	34632.7	0.00871024	8		FBXW5	0.0225991	53657.4	0.024192	25		PRNP	0.0312659	8062.55	0.00153149	3
	MTHFR	0.0225099	31351.4	0.00797754	15		HMGCR	0.0226122	5890.41	0.00111106	5		AKAP7	0.031275	14843.2	0.00383935	5
	SP7	0.0225638	4503.97	0.00089054	7		GSTM2	0.0226226	759.843	0.000146051	2		TSC2	0.0313188	32956.3	0.0156718	33
	HMGCR	0.0226122	5890.41	0.00111106	5		ARHGAP27	0.0226421	10778	0.00315415	6		NEK4	0.0313945	4078.1	0.00123494	6
	GSTM2	0.0226226	759.843	0.000146051	2		FLOT2	0.0226495	10325.1	0.00212686	3		GORASP1	0.0314745	65865.7	0.0262541	11
	ARHGAP27	0.0226421	10778	0.00315415	6		CDCA2	0.0227155	70532.8	0.0301516	30		MED26	0.0315105	4995.12	0.00110026	5
	FLOT2	0.0226495	10325.1	0.00212686	3		SERPIND1	0.0227271	44058.6	0.0149563	13		EFCAB7	0.0315358	48274.2	0.0163115	9
	SERPIND1	0.0227271	44058.6	0.0149563	13		SP7	0.0227311	4454.76	0.000861332	6		ARNT	0.0315906	33605.9	0.00836953	5
	FAM35A	0.0227537	2037.79	0.00040308	2		FAM35A	0.0227537	2037.79	0.00040308	2		GRIN2A	0.0315992	32607.7	0.00815535	7
	FBN2	0.0227609	123134	0.0635588	61		LYSMD2	0.0228274	37037.3	0.0112481	6		TPH2	0.0316691	19582.2	0.0057597	5
	LYSMD2	0.0228274	37037.3	0.0112481	6		DAAM1	0.0229993	25951.9	0.00651093	9		CCNI2	0.0316824	6823.17	0.00158725	2
	DAAM1	0.0229993	25951.9	0.00651093	9		TTBK1	0.0230164	34986.2	0.00956502	10		ZNF14	0.0317819	2465.77	0.000748345	8
	ZNF521	0.0230227	27450.3	0.00898971	20		ZNF521	0.0230227	27450.3	0.00898971	20		SLC4A9	0.0318189	9112.11	0.00314352	8
	SYT14	0.0230751	9551.63	0.00277957	9		ALKBH1	0.023031	10416.6	0.00269776	9		RPL3L	0.0318802	32269.1	0.0110276	18
	CCDC27	0.0230924	81096	0.0383377	29		SYT14	0.0230751	9551.63	0.00277957	9		DYRK1B	0.0319416	1028.58	0.000255407	4
	RPTOR	0.0231475	30655.4	0.00775064	12		RPTOR	0.0231475	30655.4	0.00775064	12		LRRC32	0.0319515	4195.9	0.000789476	2
	FAM136A	0.0231744	1972.16	0.000342052	3		SCN11A	0.0231552	23802.4	0.0105339	32		COL24A1	0.0319971	37647.1	0.0153983	18
	SCN11A	0.0231938	23803	0.0105399	33		FAM136A	0.0231744	1972.16	0.000342052	3		ARHGEF17	0.032054	35854.6	0.0147364	23
	METTL11B	0.0232658	67936.1	0.0247123	7		CEP76	0.023219	10477.3	0.00312495	7		OR4D9	0.0320784	23572.7	0.00602048	3
	FAM179A	0.0232677	75273.4	0.0340267	34		METTL11B	0.0232658	67936.1	0.0247123	7		RNF170	0.0322219	19944.7	0.00462102	2
	HEATR7B2	0.0233101	53030.5	0.0250433	42		FAM179A	0.0232677	75273.4	0.0340267	34		C17orf70	0.0322248	19654.9	0.00633549	6
	KIAA2018	0.0233227	37873.8	0.0165815	30		KIAA2018	0.0233227	37873.8	0.0165815	30		ZCCHC14	0.0322392	8231.35	0.00223988	8
	WFDC2	0.0233784	1254.68	0.000233674	2		MRC2	0.0233727	57233.3	0.0216164	20		OGFR	0.0322768	8147.75	0.00178459	4
	IL10RA	0.0234439	58693.8	0.0215878	18		WFDC2	0.0233784	1254.68	0.000233674	2		METTL11B	0.0322928	37693.3	0.0101059	4
	CUEDC1	0.0234725	12481.8	0.00286761	5		IL10RA	0.0234439	58693.8	0.0215878	18		ULK2	0.0324081	11456.9	0.00471695	11
	INPP5A	0.0234882	7281.45	0.00237753	9		INPP5A	0.0234882	7281.45	0.00237753	9		HMOX2	0.032435	5039.7	0.00134805	6
	TTC21B	0.0235086	79455.4	0.0334017	38		TTC21B	0.0235086	79455.4	0.0334017	38		GLIS3	0.0324369	25140.8	0.00849856	16
	TEX264	0.0235379	1936.12	0.000338892	2		TEX264	0.0235379	1936.12	0.000338892	2		OTUD4	0.032443	24792.7	0.0063001	6
	MRC2	0.023559	57450.4	0.0220667	24		SH2B3	0.0235581	14368.6	0.00542383	16		GLO1	0.0324673	2816.11	0.000534875	3
	TTBK1	0.0236271	35857.1	0.0103421	11		VDR	0.0236152	21048.2	0.00609009	13		TBX18	0.0325164	8891.25	0.00284231	7
	CAMKK2	0.0237376	4401.41	0.00129848	7		RC3H1	0.0236223	55937.3	0.0205982	7		CD36	0.0326287	32036.2	0.011615	22
	TCTN1	0.0237401	84372.3	0.0248047	15		KIAA1524	0.0237208	60934.5	0.0290437	24		LOH12CR1	0.0326523	11799.3	0.00343453	3
	FBXW5	0.023757	53657.5	0.0248535	26		CAMKK2	0.0237376	4401.41	0.00129848	7		CCDC93	0.0326675	6353.85	0.0015073	6
	PNMAL1	0.0237684	15193.4	0.00529851	13		TCTN1	0.0237401	84372.3	0.0248047	15		DRD2	0.032679	15561.7	0.00317861	3
	EXT1	0.0237743	4245.93	0.00129869	7		PNMAL1	0.0237684	15193.4	0.00529851	13		PIWIL3	0.0326978	60834.5	0.0256445	23
	LILRA3	0.0238455	4333.05	0.00112629	5		EXT1	0.0237743	4245.93	0.00129869	7		CORO7	0.0327589	34992.5	0.0139385	7
	FAM169A	0.0238646	6592.16	0.00179818	5		LILRA3	0.0238455	4333.05	0.00112629	5		KRT83	0.0327831	971.561	0.0002162	2
	ARHGEF12	0.023873	39141	0.0159703	23		FAM169A	0.0238646	6592.16	0.00179818	5		GSS	0.0327845	3857.69	0.00118385	7
	AICDA	0.0238889	6468.97	0.00106938	2		ARHGEF12	0.023873	39141	0.0159703	23		COQ10A	0.0329197	2315.44	0.000539896	2
	SLC40A1	0.0239262	28340.2	0.00811492	9		AICDA	0.0238889	6468.97	0.00106938	2		ZNF610	0.0329718	30231.7	0.00794521	5
	TXNDC9	0.0239267	32698.1	0.00913547	2		AXIN2	0.0239131	49257.7	0.0200131	26		PIP	0.0329732	29377.3	0.00995957	5
	RC3H1	0.0239852	55937.3	0.0207442	8		SLC40A1	0.0239262	28340.2	0.00811492	9		RNF180	0.0331173	6837.7	0.00165	5
	CFHR4	0.0240217	24291.1	0.00797908	9		TXNDC9	0.0239267	32698.1	0.00913547	2		PIWIL1	0.0333259	4316.27	0.00121538	8
	TRIML2	0.0240604	50174.5	0.0205652	23		DOCK3	0.0240098	28563.7	0.00986406	18		JPH1	0.0333284	5189.28	0.00122635	5
	NEO1	0.024075	26769.4	0.00971242	23		CFHR4	0.0240217	24291.1	0.00797908	9		PPP2R5C	0.0334025	3043.62	0.000590221	3
	KIAA1524	0.0240783	60956	0.0291781	25		TRIML2	0.0240604	50174.5	0.0205652	23		TSR1	0.0334079	47276.6	0.0167665	11
	ZNF300	0.0240895	6876.33	0.00206167	5		NEO1	0.024075	26769.4	0.00971242	23		GRM8	0.0335686	26169.7	0.00824903	11
	LIM2	0.0241008	4067.67	0.00101952	3		ZNF300	0.0240895	6876.33	0.00206167	5		TBX2	0.0336048	5614.93	0.00127614	3
	POMC	0.0241158	11911.8	0.00381918	6		LIM2	0.0241008	4067.67	0.00101952	3		2001-12-01	0.0336514	3133.44	0.0006784	2
	DOCK3	0.0241475	28564.8	0.00998814	20		POMC	0.0241158	11911.8	0.00381918	6		MAPKBP1	0.0336578	31129.8	0.0103426	15
	LILRA6	0.0241788	1924.76	0.000374173	2		LILRA6	0.0241788	1924.76	0.000374173	2		KLC4	0.03369	7771.05	0.00251709	7
	FAM176B	0.0243409	12051.8	0.00216443	2		FAM176B	0.0243409	12051.8	0.00216443	2		DLEC1	0.0338273	27309.7	0.0098722	25
	OR2A25	0.024378	16224.2	0.00410221	8		OR2A25	0.024378	16224.2	0.00410221	8		OR6X1	0.0338921	8088.06	0.00223157	3
	ALKBH1	0.024551	10540	0.00292559	11		SMOX	0.0245808	4808.7	0.00128043	6		PIK3R4	0.0339958	37455.4	0.0127935	14
	ARID1B	0.0246734	41697.7	0.0159854	26		ARID1B	0.0246734	41697.7	0.0159854	26		ZNF835	0.0340254	1348.15	0.000381395	3
	ACSM1	0.0247348	65609.2	0.0256099	23		TBX18	0.0248547	16213.8	0.00573091	13		ZW10	0.0342266	7911.49	0.00264	10
	TBX18	0.0248547	16213.8	0.00573091	13		MBOAT2	0.0248646	17131.4	0.00401689	8		TFPT	0.0343311	3095.59	0.000967343	5
	MBOAT2	0.0248646	17131.4	0.00401689	8		ACSM1	0.0248884	65508.5	0.0255924	22		SULF1	0.0345765	47873.4	0.018951	14
	GPR55	0.024924	30468.8	0.00866659	6		GPR55	0.024924	30468.8	0.00866659	6		KCTD1	0.0346067	610.259	0.000122545	2
	PGM3	0.0249483	36414.9	0.011581	11		PGM3	0.0249483	36414.9	0.011581	11		TROVE2	0.0347584	17602	0.00439968	4
	KIF1B	0.0249606	42503.3	0.0184096	30		KIF1B	0.0249606	42503.3	0.0184096	30		SMARCA1	0.0347815	3732.32	0.00084092	4
	GPR180	0.0250176	31725.4	0.00927301	8		GPR180	0.0250176	31725.4	0.00927301	8		TOM1L2	0.034861	9578.14	0.00274118	7
	MFAP3L	0.0251354	11889.1	0.00288007	7		MFAP3L	0.0251354	11889.1	0.00288007	7		WDPCP	0.0348625	39297.7	0.0139631	10
	TCF12	0.0251888	7815.62	0.00235266	9		TCF12	0.0251888	7815.62	0.00235266	9		OSBP	0.0348636	3229.19	0.000894539	5
	C4orf34	0.0251955	1795.08	0.000397292	3		C4orf34	0.0251955	1795.08	0.000397292	3		EFHA2	0.0348796	3331.71	0.000870078	6
	COG3	0.0252163	34923.3	0.0107372	12		COG3	0.0252163	34923.3	0.0107372	12		RLN1	0.0351109	1829.78	0.000333912	2
	UBAP2L	0.0252641	12479.4	0.00352797	7		UBAP2L	0.0252641	12479.4	0.00352797	7		CCDC164	0.0351118	36640	0.0126593	15
	C2orf88	0.0253043	3407.75	0.000694124	3		C2orf88	0.0253043	3407.75	0.000694124	3		FANCF	0.0351204	762.105	0.000163592	2
	RTP1	0.0253716	14929.1	0.0034557	7		ZKSCAN3	0.0253765	2773.17	0.000574408	3		VSX2	0.0351523	2868.26	0.000737422	5
	ZKSCAN3	0.0253765	2773.17	0.000574408	3		ZNF488	0.0253839	38526.9	0.0113336	12		ABCC8	0.0351582	12112.5	0.00412304	15
	ZNF488	0.0253839	38526.9	0.0113336	12		TEKT4	0.0254041	28485.5	0.010621	17		SYTL2	0.0351725	25502.8	0.00946371	14
	TEKT4	0.0254041	28485.5	0.010621	17		POP1	0.0254366	23124	0.0102304	27		AGMO	0.0352082	6207.97	0.00182849	8
	POP1	0.0254366	23124	0.0102304	27		TPH2	0.0254614	21518.4	0.00636468	8		POU4F2	0.0353402	12864.4	0.00408923	3
	LCLAT1	0.0254408	14932.8	0.00429004	7		TRIM8	0.0254916	5908.42	0.00147507	3		REM2	0.0354039	6742.84	0.00198351	6
	SLC44A1	0.0254642	14558	0.00548819	15		TMOD3	0.0255145	6010.2	0.00163576	7		ACTN3	0.0354446	10761	0.00271949	5
	TRIM8	0.0254916	5908.42	0.00147507	3		ANO6	0.025661	54153.1	0.0180219	19		HEMGN	0.0354498	2487.65	0.000609509	3
	SNX1	0.0255696	15825.9	0.00400536	4		RRP9	0.0260165	50137.8	0.0150397	10		SERPINE2	0.0354783	30548	0.0116152	4
	SH2B3	0.0255738	14453.3	0.00562829	17		FAM171B	0.0261698	41468.8	0.012225	8		RABEP2	0.0354901	4828.7	0.00107969	4
	PLA2G2C	0.0256298	2206.75	0.000382157	2		AIM1L	0.0262095	73621	0.0371801	26		TEAD3	0.0356745	5813.07	0.00188646	5
	ANO6	0.025661	54153.1	0.0180219	19		GUCY1A2	0.0262201	2447.75	0.00039725	2		PAG1	0.0357326	595.659	0.000116832	3
	TPH2	0.0258256	21519.1	0.00641726	9		HBD	0.0262445	13446.7	0.00311659	5		ZNF556	0.0357831	35226.8	0.0119157	12
	JUP	0.0258712	5575.67	0.00255058	17		OR7G3	0.0262601	123434	0.0417956	10		LMOD1	0.0358424	3844.93	0.00085289	2
	RRP9	0.0260165	50137.8	0.0150397	10		GPANK1	0.0263129	24725.4	0.00620133	5		SLC44A5	0.035855	22321.7	0.00471449	3
	FAM171B	0.0261698	41468.8	0.012225	8		PTPDC1	0.026423	49011.4	0.0216948	19		CCDC40	0.0358599	46312.1	0.0203295	21
	GUCY1A2	0.0262201	2447.75	0.00039725	2		EMP1	0.0266662	15583.5	0.00365909	7		GMPR	0.0359065	11230.8	0.00325983	7
	HBD	0.0262445	13446.7	0.00311659	5		CACNA1S	0.0266904	59989	0.0328614	44		SMCR8	0.0359281	1562.9	0.00034722	4
	OR7G3	0.0262601	123434	0.0417956	10		HIST1H2AK	0.0267277	579.837	0.000113049	2		SLCO1A2	0.0360227	10761.9	0.00292656	6
	PTPDC1	0.026423	49011.4	0.0216948	19		EPHX3	0.0268226	14830.2	0.00368053	9		ZNF507	0.036063	1854.89	0.000432788	3
	EMP1	0.0266662	15583.5	0.00365909	7		TMC7	0.0268473	69523.6	0.0300236	15		LHPP	0.0361823	10151.1	0.00266683	9
	CACNA1S	0.0266904	59989	0.0328614	44		SCRG1	0.0268518	1284.24	0.000216411	2		KANK1	0.0362728	56583.3	0.0251819	28
	HIST1H2AK	0.0267277	579.837	0.000113049	2		NAP1L5	0.0268977	1184.37	0.000270469	2		TREM2	0.0364031	10058.8	0.00200961	3
	EPHX3	0.0268226	14830.2	0.00368053	9		CORIN	0.0269682	68594.2	0.0236825	30		NT5C3	0.0364325	6317.08	0.00204606	2
	SCRG1	0.0268518	1284.24	0.000216411	2		CLMP	0.0269737	16901.8	0.00363469	7		TEKT5	0.036481	59157.8	0.0255247	20
	AIM1L	0.0268675	73682.3	0.0374254	27		B4GALT7	0.0270362	19844.9	0.00522024	9		MRPS18B	0.0365479	574.222	0.000158188	3
	NAP1L5	0.0268977	1184.37	0.000270469	2		OR4D9	0.0270513	88267.4	0.0274988	11		ZNF461	0.0365526	2206.52	0.000589133	4
	CORIN	0.0269682	68594.2	0.0236825	30		LMBRD2	0.027057	13626.1	0.00424946	6		COL1A2	0.0366365	14744.5	0.00537677	11
	B4GALT7	0.0270362	19844.9	0.00522024	9		GAS2L2	0.0270614	23621.3	0.00934151	29		DTNA	0.0366574	17627.5	0.0056028	12
	OR4D9	0.0270513	88267.4	0.0274988	11		OR12D2	0.0270625	48785.8	0.0197838	11		ANO6	0.0366673	19872.8	0.00551802	10
	LMBRD2	0.027057	13626.1	0.00424946	6		OR9K2	0.0270676	13417.8	0.00425942	9		RBFOX1	0.0367801	16115.3	0.00492246	7
	GAS2L2	0.0270614	23621.3	0.00934151	29		MMP15	0.0271377	17754.2	0.00648499	19		DNAJC2	0.0368112	1355.46	0.000362052	2
	OR12D2	0.0270625	48785.8	0.0197838	11		TBX15	0.027183	42545	0.0156863	8		ISOC2	0.0370871	6781.17	0.00164717	3
	OR9K2	0.0270676	13417.8	0.00425942	9		GPR82	0.0271975	6810.1	0.00152487	3		NCAPD2	0.0371497	33781	0.0139359	21
	MMP15	0.0271377	17754.2	0.00648499	19		TGM2	0.0272244	22998.5	0.00761278	20		SLC52A1	0.037169	2868.16	0.00080345	4
	TBX15	0.027183	42545	0.0156863	8		SLC5A5	0.0272427	25317.4	0.00588693	9		ACTL7A	0.0372113	28107.4	0.0091375	12
	GPR82	0.0271975	6810.1	0.00152487	3		DCLK1	0.0272652	9401.79	0.00248709	5		MEP1B	0.037281	11878.1	0.00387289	12
	TGM2	0.0272244	22998.5	0.00761278	20		IPO13	0.0272843	14909.6	0.00367791	5		SLC15A3	0.0375321	8506.78	0.002375	9
	TMOD3	0.0272298	6011.29	0.00170004	8		PCSK9	0.0273702	21209.5	0.0104939	23		MCM5	0.0376098	27871.6	0.0119733	25
	SLC5A5	0.0272427	25317.4	0.00588693	9		HIP1R	0.0274436	27181.6	0.0106704	24		CYTH1	0.0377292	9926.05	0.00241792	5
	DCLK1	0.0272652	9401.79	0.00248709	5		TMEM220	0.027487	40071.8	0.00990331	6		RAB3C	0.0378252	1329.05	0.000376679	4
	IPO13	0.0272843	14909.6	0.00367791	5		ALPPL2	0.0275951	8358.17	0.0018023	5		PSMB9	0.0380164	20998	0.00653321	3
	HIP1R	0.0274436	27181.6	0.0106704	24		ZMAT4	0.0276013	1991.54	0.000408188	2		MIOS	0.0380165	5498.79	0.00165874	7
	TMEM220	0.027487	40071.8	0.00990331	6		FAM55A	0.0276091	32813.8	0.0108031	17		SATB1	0.0381281	7370.64	0.00142551	2
	ALPPL2	0.0275951	8358.17	0.0018023	5		NUP93	0.0276272	16986.3	0.00613039	12		TSTA3	0.0381321	6151.55	0.00135264	5
	FAM55A	0.0276091	32813.8	0.0108031	17		BACE2	0.0276304	16081.7	0.00547391	3		FAM102B	0.0381535	3424.78	0.000896449	3
	NUP93	0.0276272	16986.3	0.00613039	12		THADA	0.02765	96108.1	0.0474659	41		DAP	0.038238	11996.2	0.00235532	2
	BACE2	0.0276304	16081.7	0.00547391	3		OS9	0.0277214	24430	0.00781991	9		CLDN16	0.0384882	10834.1	0.00257668	3
	CKAP4	0.0276936	6899.33	0.00326075	13		SPATA12	0.0277664	1922.76	0.00044991	3		C3orf26	0.0385164	10214.5	0.00232914	3
	OS9	0.0277214	24430	0.00781991	9		ST6GALNAC5	0.0277907	3379.46	0.000545523	2		SCN8A	0.0385295	3170.31	0.000674441	2
	SPATA12	0.0277664	1922.76	0.00044991	3		LCK	0.0278013	3766.89	0.00104069	2		COX16	0.0386081	1095.35	0.000239698	2
	ST6GALNAC5	0.0277907	3379.46	0.000545523	2		TM2D3	0.0279478	7662.07	0.00230818	8		SLC2A14	0.038639	3286.72	0.000725036	2
	TM2D3	0.0279478	7662.07	0.00230818	8		BCLAF1	0.0279848	66864.8	0.0311138	26		GPR97	0.0387432	26855.7	0.00996789	4
	BCLAF1	0.0279848	66864.8	0.0311138	26		SGMS1	0.0280031	1857.59	0.000403221	3		OR52A1	0.0388052	15108.9	0.00359108	5
	SGMS1	0.0280031	1857.59	0.000403221	3		KLC4	0.0280886	20355.3	0.00673646	13		BGN	0.038852	720.976	0.000151555	2
	ABAT	0.0280334	4842.59	0.0013946	6		SNCG	0.0281115	9549.96	0.00285121	6		LMAN2	0.0388969	26439.9	0.00815774	5
	KLC4	0.0280886	20355.3	0.00673646	13		TP53I13	0.028135	39556.9	0.0122333	7		MPZL2	0.0389347	23151.9	0.00630724	9
	SNCG	0.0281115	9549.96	0.00285121	6		SMAD1	0.0281457	2594.76	0.00046737	3		AVPR1A	0.0389479	288.274	7.01023e-05	2
	TP53I13	0.028135	39556.9	0.0122333	7		NAALAD2	0.0282026	35683.9	0.0108409	12		C1orf216	0.0391848	7827.12	0.00203929	5
	SMAD1	0.0281457	2594.76	0.00046737	3		EVI5	0.0282401	28599.6	0.00891163	14		PRMT5	0.0391981	1009.88	0.000211155	3
	NAALAD2	0.0282026	35683.9	0.0108409	12		ULK1	0.0282744	34258.4	0.0136235	21		RNF146	0.0392734	7032.41	0.00140201	2
	ZCCHC14	0.0282073	9347.18	0.00278629	12		ARL6IP4	0.028316	6630.39	0.00257253	6		WDR35	0.0394969	26541.3	0.0110134	27
	EVI5	0.0282401	28599.6	0.00891163	14		MLL3	0.0283192	93845	0.0535739	64		ZKSCAN3	0.03964	2023.6	0.000368095	2
	ARL6IP4	0.028316	6630.39	0.00257253	6		HLCS	0.0283738	34584.2	0.0116976	19		CARD6	0.0396479	11014.7	0.00347332	11
	OR8G5	0.0284026	15472.1	0.00447403	4		CYP4F12	0.0283947	45169.2	0.0165613	18		FAM129B	0.0396517	3352.95	0.000829611	5
	THADA	0.0284673	96346.8	0.0482783	45		OR8G5	0.0284026	15472.1	0.00447403	4		CLASP2	0.0396732	38947	0.012663	3
	PRPF4B	0.0285366	21722.8	0.00578709	9		SMARCC2	0.0285482	9889.85	0.00316868	12		C6orf89	0.039716	7592.64	0.00158631	3
	SMARCC2	0.0285482	9889.85	0.00316868	12		PRPF4B	0.0285675	21644.5	0.00573451	8		STRC	0.0398811	207.284	5.25749e-05	2
	IFRD2	0.0285926	81431.1	0.0338726	20		SLAMF9	0.0286785	52154.3	0.0223418	7		AP4B1	0.0400426	16991.5	0.00527992	13
	SLAMF9	0.0286785	52154.3	0.0223418	7		GABRA4	0.0286913	28129.6	0.00849579	4		PRRX1	0.040153	8138.05	0.00256986	5
	GABRA4	0.0286913	28129.6	0.00849579	4		AIFM2	0.0287703	67666.5	0.0250897	16		SBSN	0.0403157	2374.47	0.000555275	2
	AIFM2	0.0287703	67666.5	0.0250897	16		PSMC5	0.0287969	6009.98	0.00131861	3		SCAF8	0.04037	29330.9	0.00947599	8
	PSMC5	0.0287969	6009.98	0.00131861	3		MAGEA10	0.0289519	27167.7	0.00591901	4		CHN2	0.0403811	19986.1	0.00560275	6
	SPAG4	0.0288742	33243.8	0.0105693	14		SERPINE3	0.0290885	17647.4	0.0050906	7		ZFHX3	0.0404357	88147.4	0.053812	56
	MAGEA10	0.0289519	27167.7	0.00591901	4		MOCS1	0.0291197	25779.8	0.00862576	18		C6orf162	0.0405896	21346.7	0.0057147	5
	SERPINE3	0.0290885	17647.4	0.0050906	7		ECHDC1	0.0292159	6009.2	0.00148123	6		COG1	0.0407782	38387.7	0.0127564	9
	MOCS1	0.0291197	25779.8	0.00862576	18		PHACTR4	0.0292846	23090.5	0.00761106	16		RHCE	0.040807	1369.5	0.000281335	2
	KCP	0.0292086	75172	0.0372834	18		USP31	0.0293854	38242.2	0.0144206	18		RASSF9	0.0409293	7395.54	0.0020099	4
	ECHDC1	0.0292159	6009.2	0.00148123	6		ACAD8	0.0293944	10636.9	0.00299909	4		OR4N5	0.0409388	23567.3	0.00854815	6
	PHACTR4	0.0292846	23090.5	0.00761106	16		CEP85	0.0295017	25364.4	0.00801416	16		PSAT1	0.0409913	1255.57	0.000333016	4
	ACAD8	0.0293944	10636.9	0.00299909	4		CXCR1	0.0295353	46875.6	0.0159186	8		FBXO8	0.0410959	22576.4	0.00605614	3
	USP31	0.0294172	38324.1	0.01451	19		KCP	0.0295362	74893.6	0.0371567	17		SLC30A5	0.0411273	35015.4	0.0160418	9
	CXCR1	0.0295353	46875.6	0.0159186	8		PCDHGC5	0.0295404	17424.2	0.00649103	14		TNK1	0.0411417	30760.5	0.00835753	4
	PCDHGC5	0.0295404	17424.2	0.00649103	14		INTS9	0.029554	3079.95	0.000917576	8		PRKCZ	0.041158	3852.86	0.00117484	4
	INTS9	0.029554	3079.95	0.000917576	8		LAMB2	0.0295829	48935.4	0.0236652	51		SLC26A7	0.0412855	17588.3	0.00415249	5
	LAMB2	0.0295829	48935.4	0.0236652	51		ROBO1	0.0295952	33478.1	0.0147678	22		CGN	0.0413198	56248.3	0.0246774	26
	ROBO1	0.0295952	33478.1	0.0147678	22		PMS1	0.0296373	74371.7	0.0259682	27		FSTL4	0.0414454	33780.4	0.0105474	12
	PMS1	0.0296373	74371.7	0.0259682	27		CEP104	0.0297512	43833.9	0.0187946	33		IL18RAP	0.0414479	2212.4	0.000490673	2
	RBFOX1	0.0297636	18127.9	0.00565309	10		RBFOX1	0.0297636	18127.9	0.00565309	10		THRAP3	0.0414685	1796.59	0.000500522	4
	ZNF14	0.0298243	5859.8	0.00179435	13		ZNF14	0.0298243	5859.8	0.00179435	13		BFAR	0.0415443	18356.1	0.00562382	6
	CDH18	0.0298916	11136.2	0.00367591	13		CDH18	0.0298916	11136.2	0.00367591	13		TPBG	0.0415545	11944.2	0.00284542	2
	MFSD2B	0.0299015	50749.6	0.0207573	14		MFSD2B	0.0299015	50749.6	0.0207573	14		SEMA6C	0.041776	23665.2	0.00859872	8
	GTF3C6	0.030083	443.657	9.34707e-05	2		ARID4B	0.0300515	32909.4	0.0115809	14		KDELR2	0.0418132	2243.22	0.000560823	3
	C12orf23	0.0300986	2364.08	0.000488495	2		GTF3C6	0.030083	443.657	9.34707e-05	2		DCTN4	0.0419031	5657.62	0.00171296	9
	HSDL1	0.0301116	3005.23	0.000666096	4		C12orf23	0.0300986	2364.08	0.000488495	2		SRSF4	0.0420958	6601.46	0.00129114	2
	GRM5	0.030122	30433.4	0.00820757	5		SLC26A9	0.0301028	83712.2	0.0418945	25		CLPSL1	0.0421285	899.688	0.000198622	2
	HINT2	0.0301399	1644.16	0.000579219	5		HSDL1	0.0301116	3005.23	0.000666096	4		KIAA1107	0.0421607	24045.3	0.00957739	2
	TMEM106A	0.0302635	17794.7	0.00478682	8		GRM5	0.030122	30433.4	0.00820757	5		ROBO1	0.0421731	18332.9	0.00819627	14
	PIP	0.0303523	32492.1	0.0115549	9		HINT2	0.0301399	1644.16	0.000579219	5		CLEC6A	0.042233	41802.2	0.015956	5
	MLL3	0.0303922	94205.7	0.0548022	65		TELO2	0.0301849	22240.9	0.0094523	21		PTPRZ1	0.0422432	22386.3	0.00718402	24
	CD36	0.0304011	35727.5	0.0138645	28		TMEM106A	0.0302635	17794.7	0.00478682	8		SNUPN	0.042262	33349	0.0122919	10
	ZNRF3	0.0304696	7537.06	0.00155715	5		PIP	0.0303523	32492.1	0.0115549	9		UQCRB	0.042413	1282.29	0.000327131	2
	CIB1	0.0305066	1494.94	0.000382492	3		VCAN	0.0303552	138803	0.079694	79		SLC1A5	0.0424156	6803.79	0.00207499	6
	FOXRED2	0.0305128	68958.9	0.0322908	22		CD36	0.0304011	35727.5	0.0138645	28		GPM6B	0.0425513	10110.8	0.00189825	2
	SLC26A9	0.0305182	83723.6	0.0420581	26		SSBP4	0.0304046	6530.04	0.00144457	4		SYNE2	0.0425559	83607	0.0441691	52
	C3orf23	0.0305998	4699.86	0.00159449	10		ZNRF3	0.0304696	7537.06	0.00155715	5		GPR39	0.0426621	2011.01	0.000438171	2
	GMPR	0.0307388	12372.5	0.00365741	9		CIB1	0.0305066	1494.94	0.000382492	3		APLF	0.0427651	17138.3	0.00562605	9
	SSBP4	0.0308516	6916.04	0.00171344	5		FOXRED2	0.0305128	68958.9	0.0322908	22		CADPS	0.0427979	6379.19	0.00218758	10
	IGSF11	0.0308582	11236.2	0.003785	11		RTP1	0.0305475	13798	0.0032337	6		ZBTB32	0.0428213	871.234	0.000186964	2
	ARSH	0.0308762	111014	0.0447678	22		ABAT	0.0305694	4571.08	0.0012953	5		BBOX1	0.0429145	27021.8	0.00767228	6
	ARID4B	0.0309843	32959	0.0117972	15		C3orf23	0.0305998	4699.86	0.00159449	10		TPTE	0.0429163	7802.96	0.00177967	4
	SMYD5	0.0310123	19681.7	0.00434984	5		TMEM116	0.0306405	11173.4	0.00254321	3		ARRDC3	0.0429335	4358.43	0.00106625	4
	SLC15A3	0.0310317	10330.4	0.00342712	16		GMPR	0.0307388	12372.5	0.00365741	9		C6orf222	0.0429907	8854.37	0.00289084	6
	BSG	0.0310432	5688.21	0.00230737	11		IGSF11	0.0308582	11236.2	0.003785	11		PPFIA2	0.0430766	38918.6	0.0134819	9
	VCAN	0.0311094	142953	0.0824119	80		ARSH	0.0308762	111014	0.0447678	22		DARS	0.0430843	16836.4	0.0066908	7
	CCR8	0.0311471	12081.2	0.00333916	4		SMYD5	0.0310123	19681.7	0.00434984	5		SYTL5	0.0432735	2240.94	0.000708552	6
	TFRC	0.0311471	17067.3	0.00474727	11		SLC15A3	0.0310317	10330.4	0.00342712	16		TTC17	0.0433268	11655.3	0.00318339	14
	OR5W2	0.0311918	13470.3	0.00544081	14		CCR8	0.0311471	12081.2	0.00333916	4		TTC12	0.0433909	9921.26	0.00354844	14
	TYK2	0.0312761	51703.2	0.0204955	24		TYK2	0.0312761	51703.2	0.0204955	24		2009-09-01	0.0434297	5419.11	0.00227719	11
	DTNA	0.0313331	19186	0.00618701	15		DTNA	0.0313331	19186	0.00618701	15		GYG1	0.0434465	14562.4	0.00559243	6
	TINAG	0.0313686	48404.4	0.0188485	14		TINAG	0.0313686	48404.4	0.0188485	14		TRIML2	0.0435475	15890.4	0.00482351	4
	TELO2	0.0313692	22329.7	0.0096277	22		RNF111	0.0314347	15375.3	0.0064542	16		MAST4	0.0436333	34145.2	0.0165435	14
	OR5AU1	0.0315366	62864.8	0.0254461	17		OR5AU1	0.0315366	62864.8	0.0254461	17		TUB	0.0437721	34098.9	0.0103913	7
	C19orf55	0.0315477	25700.8	0.00717615	5		PPWD1	0.0315436	7077.06	0.00225026	10		KEAP1	0.0437767	2355.1	0.000539186	3
	GJB2	0.031569	34977.1	0.0136514	18		C19orf55	0.0315477	25700.8	0.00717615	5		MAP9	0.0438042	11968.5	0.00293297	4
	CORO7	0.0315743	39572.6	0.0167792	11		GJB2	0.031569	34977.1	0.0136514	18		ALDH3A2	0.0438913	15977.5	0.00404245	4
	C15orf52	0.031588	36418	0.0124205	13		CORO7	0.0315743	39572.6	0.0167792	11		NHSL1	0.043934	26580.3	0.00726594	3
	FGL1	0.0316042	17114.5	0.00573571	15		C15orf52	0.031588	36418	0.0124205	13		MRPS27	0.0441024	7148.57	0.00182044	5
	FAM70B	0.0316156	41354	0.0189729	20		FGL1	0.0316042	17114.5	0.00573571	15		PARP8	0.0441344	7538.16	0.00169546	9
	DNA2	0.0316817	67720.3	0.0306207	19		FAM70B	0.0316156	41354	0.0189729	20		TPP1	0.044176	18518.5	0.00717664	12
	C7orf45	0.031694	8157.16	0.00254263	5		DNA2	0.0316817	67720.3	0.0306207	19		OR14A16	0.0445515	19856.9	0.00708063	3
	TMEM61	0.0317904	22458.1	0.0056256	9		C7orf45	0.031694	8157.16	0.00254263	5		FGR	0.0445954	2767.5	0.000907661	3
	OR52E4	0.0317943	33530.2	0.0105002	7		MCM8	0.0317761	65699.9	0.027491	26		LMF1	0.0446824	40735.6	0.0192234	11
	MACF1	0.0318633	207025	0.121721	127		TMEM61	0.0317904	22458.1	0.0056256	9		SLC22A24	0.0447956	16601.3	0.00470631	3
	CEACAM18	0.0319659	37207.3	0.0122548	12		OR52E4	0.0317943	33530.2	0.0105002	7		SARS	0.0449214	14441.9	0.00344858	6
	MCM8	0.0319811	65699.9	0.0275611	27		CEACAM18	0.0319659	37207.3	0.0122548	12		FKBP5	0.044926	1864.66	0.000420623	2
	TMEM116	0.0320841	11180.6	0.00267172	4		ZDHHC1	0.0320108	10554.2	0.00262734	5		STK19	0.0449543	7874.15	0.00238184	3
	COL18A1	0.032109	91549.7	0.0489189	42		COL18A1	0.032109	91549.7	0.0489189	42		EME2	0.0450397	7683.61	0.00245442	7
	LCK	0.0321558	3877.37	0.00120151	3		PHYHIPL	0.0321598	3211.76	0.000829317	3		AGBL5	0.0450438	16415.6	0.00495856	11
	PHYHIPL	0.0321598	3211.76	0.000829317	3		VRTN	0.0323925	24169.7	0.0108186	17		TFCP2L1	0.0451024	2698.4	0.000688419	3
	C4orf19	0.0322156	20175.2	0.00858617	17		EFHA2	0.0324321	3753.56	0.0011403	9		C4orf40	0.0451078	1624.87	0.000406889	2
	EFHA2	0.0324321	3753.56	0.0011403	9		GLO1	0.0324673	2816.11	0.000534875	3		PHLPP1	0.045146	26448.8	0.010074	10
	GLO1	0.0324673	2816.11	0.000534875	3		GLT6D1	0.0324874	19887.2	0.00697918	13		DAGLB	0.0451952	20922.4	0.00667007	7
	GLT6D1	0.0324874	19887.2	0.00697918	13		ASXL2	0.0325063	70008.4	0.0308849	22		MPP3	0.0452242	30119	0.00887009	7
	ASXL2	0.0325063	70008.4	0.0308849	22		MUTED	0.0325109	14256.3	0.0030555	5		ATP5J2	0.0452775	10514.8	0.00224942	2
	MUTED	0.0325109	14256.3	0.0030555	5		RET	0.0325497	29048.4	0.0104371	17		LSM14A	0.0453071	6794.87	0.00184613	4
	RET	0.0325497	29048.4	0.0104371	17		ZNF669	0.0326021	34278.1	0.0123693	15		TRAK1	0.0453139	15982.2	0.00588908	11
	ZDHHC1	0.0325927	10558.1	0.00267408	6		ZCCHC14	0.0326289	8666.38	0.00256704	11		MN1	0.0454127	22162.3	0.00768539	5
	ZNF669	0.0326021	34278.1	0.0123693	15		LOH12CR1	0.0326523	11799.3	0.00343453	3		CCR1	0.0454179	425.642	7.61345e-05	2
	RNF111	0.0326094	15783.1	0.00676979	17		DRD2	0.032679	15561.7	0.00317861	3		MAMDC2	0.0454205	17817	0.00637036	11
	LOH12CR1	0.0326523	11799.3	0.00343453	3		WDPCP	0.0327269	45837.8	0.0180404	16		RNF19A	0.045424	10449.9	0.00380177	10
	ASPSCR1	0.0326708	23336.1	0.00744378	10		FAT3	0.0327292	137323	0.0762869	73		SLC35E4	0.0454731	1494.19	0.000373972	3
	DRD2	0.032679	15561.7	0.00317861	3		KIAA1462	0.0327528	52236.1	0.0254605	36		ST5	0.045541	29439.8	0.00828658	7
	WDPCP	0.0327269	45837.8	0.0180404	16		TMEM200B	0.0328183	3542.09	0.00120078	3		FGFR1OP	0.0456095	12937.7	0.00438625	8
	FAT3	0.0327292	137323	0.0762869	73		RAVER1	0.0330471	26044.4	0.00921208	12		DCTN6	0.0456252	1288.52	0.000297967	2
	KIAA1462	0.0327528	52236.1	0.0254605	36		AGTPBP1	0.0331722	32415.6	0.00968575	16		C1QTNF2	0.0456573	3987.65	0.00125488	5
	TMEM200B	0.0328183	3542.09	0.00120078	3		ARHGAP19	0.0332544	38321.3	0.0125864	7		RFX1	0.0458076	11580.1	0.00265683	3
	LILRB1	0.0329237	4572.26	0.00139182	10		SCAF8	0.0332708	37906.3	0.0142234	19		RBM47	0.0459251	25420.5	0.0064317	6
	ARHGAP19	0.0332544	38321.3	0.0125864	7		C1QTNF8	0.0332838	27339.8	0.00817766	5		FBLN7	0.0459696	15760.7	0.00599187	9
	SCAF8	0.0332708	37906.3	0.0142234	19		SRRM1	0.0333656	23429.8	0.00707123	6		HK2	0.0461218	4309.63	0.00106343	4
	C1QTNF8	0.0332838	27339.8	0.00817766	5		ZNF556	0.0333854	69424.6	0.0240547	22		HSD17B11	0.0463315	1583.44	0.000380258	2
	SRRM1	0.0333656	23429.8	0.00707123	6		EMILIN1	0.0334612	36972	0.0127927	21		HMX2	0.0463525	2167.88	0.000572713	2
	SLC22A18AS	0.0334885	38839.6	0.0135343	4		SLC22A18AS	0.0334885	38839.6	0.0135343	4		FAM217A	0.0464303	23189.8	0.00733774	8
	SNX29	0.0334991	10046.5	0.00358177	9		SNX29	0.0334991	10046.5	0.00358177	9		BCKDHA	0.0464375	36461	0.0124711	6
	AHSP	0.0335048	278.072	5.96545e-05	2		AHSP	0.0335048	278.072	5.96545e-05	2		PMS1	0.046458	19958.4	0.00613614	12
	ZNF556	0.0335201	69448.7	0.0241248	23		ECHDC3	0.033545	10755.7	0.00407942	13		MAP3K8	0.0464892	4588.37	0.00117555	5
	ECHDC3	0.033545	10755.7	0.00407942	13		POLI	0.0335859	25900.8	0.00952549	19		C16orf57	0.0464902	4262.9	0.00106149	5
	POLI	0.0335859	25900.8	0.00952549	19		TBX2	0.0336048	5614.93	0.00127614	3		PUM1	0.0465173	2662.31	0.000797731	5
	INTS1	0.0335874	59813.5	0.029744	35		2001-12-01	0.0336514	3133.44	0.0006784	2		TBL2	0.0465184	2988.71	0.00101601	6
	TBX2	0.0336048	5614.93	0.00127614	3		RAD21L1	0.03375	29252.5	0.00792556	6		FEZF1	0.0465965	419.637	0.000120078	2
	2001-12-01	0.0336514	3133.44	0.0006784	2		CPSF7	0.0338032	2927.49	0.00074349	4		ATP5C1	0.0466842	1855.69	0.000557069	3
	RAD21L1	0.03375	29252.5	0.00792556	6		TTC16	0.033816	84642.2	0.0454736	31		EP400	0.0466848	17093.2	0.0063508	22
	CPSF7	0.0338032	2927.49	0.00074349	4		ANAPC7	0.0338945	19491.9	0.0056032	4		SMC6	0.0466921	11745.9	0.0027942	3
	TTC16	0.033816	84642.2	0.0454736	31		COL20A1	0.033921	61352.4	0.0276863	29		CPSF1	0.0467318	7317.83	0.00272608	11
	COL20A1	0.033921	61352.4	0.0276863	29		IL7R	0.0339759	26355.8	0.00780429	16		THAP1	0.046878	1083.65	0.000268719	2
	PARP15	0.033927	90807.5	0.0386635	19		C15orf42	0.0340283	66354.6	0.0364294	59		ZBTB25	0.0472059	17327.3	0.0051029	6
	IL7R	0.0339759	26355.8	0.00780429	16		SCN8A	0.0340445	3726.59	0.000938324	5		TRAF5	0.0472704	8515.66	0.00188118	4
	SCN8A	0.0340445	3726.59	0.000938324	5		OSBPL5	0.0340676	52716.4	0.0204997	19		ZNF645	0.0473004	6773.54	0.00168113	2
	GPATCH2	0.0342298	33895.7	0.0110701	12		GPATCH2	0.0342298	33895.7	0.0110701	12		SNAPC2	0.0475024	1251.85	0.000325563	3
	VRTN	0.0342366	24175.8	0.0109997	18		PARP8	0.0342899	8678.74	0.00196417	11		C1orf174	0.0476857	25388.5	0.00860208	7
	OSBPL5	0.0343196	54795.9	0.022013	20		MYBL2	0.0344226	34013.6	0.0130573	17		UCK1	0.047714	1572.61	0.00036683	2
	MYBL2	0.0344226	34013.6	0.0130573	17		LMOD2	0.0344376	20674.5	0.00701931	9		HINT2	0.0477456	1300.12	0.000476272	3
	LMOD2	0.0344376	20674.5	0.00701931	9		TROVE2	0.034468	17845.9	0.00454575	6		SRPK2	0.0478248	2108.79	0.000473235	2
	TROVE2	0.034468	17845.9	0.00454575	6		EHBP1	0.0345026	47708.5	0.0218621	28		GML	0.0479584	9775.98	0.00217967	3
	EHBP1	0.0345026	47708.5	0.0218621	28		LRRC14	0.0345285	11526.5	0.00419708	8		CLDN2	0.0480385	3596.01	0.000808735	2
	CANX	0.0345801	23963.8	0.007274	6		OTUD4	0.0345625	25113.1	0.0069435	10		CRBN	0.0480706	264.669	7.04723e-05	2
	SLCO4C1	0.0346019	21345.4	0.00805063	14		CANX	0.0345801	23963.8	0.007274	6		ZMYND8	0.0481138	1544.9	0.000447365	4
	SLC5A9	0.0346097	88499.9	0.0364089	25		SLCO4C1	0.0346019	21345.4	0.00805063	14		AKIP1	0.0482162	9773.3	0.00300653	4
	SLC7A1	0.0346285	18879.3	0.00463377	7		SLC5A9	0.0346097	88499.9	0.0364089	25		CMTM5	0.0482674	10530.8	0.00270101	6
	NTS	0.0346632	8713.77	0.00207864	4		SLC7A1	0.0346285	18879.3	0.00463377	7		PTTG2	0.0483035	4178.69	0.00109836	3
	CER1	0.0346683	4541.85	0.00105386	5		NTS	0.0346632	8713.77	0.00207864	4		ARVCF	0.0485581	38678.2	0.0198618	21
	SMARCA1	0.0347815	3732.32	0.00084092	4		CER1	0.0346683	4541.85	0.00105386	5		ARHGDIG	0.0486734	2737.03	0.000584287	2
	TOM1L2	0.034861	9578.14	0.00274118	7		ADAMTS7	0.0346981	20300.2	0.00731319	14		SGK223	0.0488447	57139	0.0275433	21
	MCM7	0.0349003	20526	0.00846624	19		SMARCA1	0.0347815	3732.32	0.00084092	4		TRPM4	0.0489705	50543.9	0.0229833	21
	RAVER1	0.0349466	26074.4	0.00961031	16		TOM1L2	0.034861	9578.14	0.00274118	7		MACC1	0.049041	26192.7	0.009643	15
	SLC22A17	0.034985	12437	0.00361256	5		MCM7	0.0349003	20526	0.00846624	19		SLC5A10	0.0490597	1645.27	0.000546159	6
	GORASP1	0.0350664	68479.2	0.0301685	16		SLC22A17	0.034985	12437	0.00361256	5		MRFAP1L1	0.0490897	14504.2	0.00406049	2
	DDX54	0.0351891	40227.6	0.0195447	25		GORASP1	0.0350664	68479.2	0.0301685	16		OR6K3	0.0491934	25888.2	0.0087049	4
	GTF2E2	0.0351959	29876.9	0.00833438	5		TTC17	0.0350823	14521.6	0.00451644	22		TIMM17A	0.049196	2156.15	0.000566655	3
	C17orf102	0.0352377	11067.2	0.00295849	4		LMF1	0.0351057	71581.7	0.0391138	25		MCM8	0.0491978	33403.3	0.0141026	17
	LAMB4	0.0352554	77071	0.0389105	44		DDX54	0.0351891	40227.6	0.0195447	25		HIST1H4C	0.0492089	1821.62	0.000362217	2
	POU4F2	0.0353402	12864.4	0.00408923	3		GTF2E2	0.0351959	29876.9	0.00833438	5		ADTRP	0.0492634	31644.3	0.0136493	4
	CCDC116	0.0354484	66276.8	0.0315033	26		C17orf102	0.0352377	11067.2	0.00295849	4		EHBP1	0.0492886	38315	0.0173573	19
	TEAD3	0.0356745	5813.07	0.00188646	5		LAMB4	0.0352554	77071	0.0389105	44		PDGFRB	0.0492898	18599.2	0.00549435	18
	IFI27L1	0.0357235	7556.13	0.00227196	5		POU4F2	0.0353402	12864.4	0.00408923	3		ATP6V1C2	0.0493791	8028.26	0.00238558	4
	APOD	0.0357259	66457.4	0.024099	6		CCDC116	0.0354484	66276.8	0.0315033	26		OSGEP	0.0494134	5690.04	0.00197184	7
	HLCS	0.0357511	46897	0.0193234	26		BFAR	0.0356345	19677.3	0.00592214	9		SERPINF1	0.0494589	6117.15	0.0022378	10
	BFAR	0.0357805	19706.7	0.00596303	10		TEAD3	0.0356745	5813.07	0.00188646	5		SLC4A5	0.0495186	6231.54	0.00205597	7
	B4GALNT4	0.0357931	34706.4	0.0159471	16		IFI27L1	0.0357235	7556.13	0.00227196	5		ACAA2	0.0497529	9423.88	0.0027378	6
	CACNA1E	0.0359044	22226	0.008578	15		B4GALNT4	0.0357931	34706.4	0.0159471	16		HIPK2	0.0497618	1222.26	0.000336105	2
	OTUD4	0.0359917	25160.3	0.00723363	11		DLEC1	0.0358287	77039	0.0402199	56		BTAF1	0.0497807	14905.2	0.00389946	5
	AHRR	0.035993	37173.2	0.0152947	12		CACNA1E	0.0359044	22226	0.008578	15		OR4F6	0.0498507	6287.26	0.00215586	8
	OR4N5	0.0360284	77331.6	0.0237957	14		INTS1	0.0359595	58654.7	0.0292905	29		RIMKLA	0.0498687	497.62	0.000116845	2
	IGFALS	0.036107	38543.9	0.0146539	22		AHRR	0.035993	37173.2	0.0152947	12
	GALNTL6	0.036252	2574.22	0.000783526	6		OR4N5	0.0360284	77331.6	0.0237957	14
	OXSR1	0.0362683	8121.91	0.00220337	3		PTPRZ1	0.0360454	38697.8	0.017603	43
	PSMB9	0.036273	21454.5	0.00661841	4		IGFALS	0.036107	38543.9	0.0146539	22
	DUOXA1	0.036321	26582.3	0.00998363	16		C4orf19	0.0361701	18589	0.00748563	13
	LRRC6	0.0364908	21844.2	0.00802233	17		GALNTL6	0.036252	2574.22	0.000783526	6
	RCC1	0.0365464	9874.42	0.00223433	8		OXSR1	0.0362683	8121.91	0.00220337	3
	C5orf65	0.0366037	27854.8	0.00884672	4		PSMB9	0.036273	21454.5	0.00661841	4
	THNSL1	0.036755	28965	0.010465	11		DUOXA1	0.036321	26582.3	0.00998363	16
	ADAMTS7	0.0368297	20315.9	0.00761366	15		LRRC6	0.0364908	21844.2	0.00802233	17
	HIGD1B	0.0368596	7129.26	0.00156076	3		RCC1	0.0365464	9874.42	0.00223433	8
	SNUPN	0.0369157	36305.5	0.0135771	13		C5orf65	0.0366037	27854.8	0.00884672	4
	MAPKAP1	0.036955	18484.6	0.0041481	5		ZNF382	0.0367534	2474.44	0.000568668	2
	SEC14L1	0.0369785	23115.7	0.00850519	10		THNSL1	0.036755	28965	0.010465	11
	ZNF263	0.0369821	13496.1	0.00462641	15		HIGD1B	0.0368596	7129.26	0.00156076	3
	EPS15	0.037033	19443.7	0.00725362	14		SNUPN	0.0369157	36305.5	0.0135771	13
	ACTL7A	0.0370516	29188	0.0099327	15		MAPKAP1	0.036955	18484.6	0.0041481	5
	ZNF138	0.0372918	51869.8	0.021591	6		SEC14L1	0.0369785	23115.7	0.00850519	10
	FURIN	0.0373517	46754.4	0.0199279	18		ZNF263	0.0369821	13496.1	0.00462641	15
	ULK1	0.0374493	37103.9	0.0169525	24		EPS15	0.037033	19443.7	0.00725362	14
	ZIC1	0.0374954	5549.12	0.0014942	2		BSG	0.0370836	5179.78	0.00213679	10
	CMIP	0.037539	1914.13	0.000505682	4		FBN3	0.0371701	154832	0.101236	114
	TP53	0.0375488	3415.35	0.000841275	4		ZNF138	0.0372918	51869.8	0.021591	6
	ZNF766	0.0375928	23018.6	0.00758563	10		FURIN	0.0373517	46754.4	0.0199279	18
	MRPS14	0.0376189	1255.12	0.000274555	2		CMIP	0.037539	1914.13	0.000505682	4
	EMILIN1	0.0376812	36972.2	0.0141749	23		ZNF766	0.0375928	23018.6	0.00758563	10
	CYTH1	0.0377292	9926.05	0.00241792	5		CYTH1	0.0377292	9926.05	0.00241792	5
	ASH1L	0.0377587	54902.4	0.0271283	29		ASH1L	0.0377587	54902.4	0.0271283	29
	FETUB	0.0377758	38780.4	0.0139071	9		ACTL7A	0.0378499	28506.6	0.00955296	14
	RNF217	0.0378618	38924.6	0.0144438	7		RNF217	0.0378618	38924.6	0.0144438	7
	SLC44A5	0.0379981	26100.4	0.00945825	6		SLC44A5	0.0379981	26100.4	0.00945825	6
	MIOS	0.0380165	5498.79	0.00165874	7		MIOS	0.0380165	5498.79	0.00165874	7
	CCL11	0.0380399	20479	0.00496118	4		CCL11	0.0380399	20479	0.00496118	4
	MCM5	0.0381298	27874.2	0.0120434	27		MCM5	0.0381298	27874.2	0.0120434	27
	COQ10A	0.0382877	2329.1	0.000628555	5		COQ10A	0.0382877	2329.1	0.000628555	5
	ADORA3	0.0382931	19945.4	0.00874087	11		ADORA3	0.0382931	19945.4	0.00874087	11
	CCNI2	0.0383389	7486.71	0.00232232	5		CCNI2	0.0383389	7486.71	0.00232232	5
	BUB1	0.0383472	17417.3	0.00447678	8		BUB1	0.0383472	17417.3	0.00447678	8
	CD2BP2	0.0383603	27896.8	0.00778096	2		CD2BP2	0.0383603	27896.8	0.00778096	2
	PRKG1	0.0384787	9308.26	0.00273381	6		SERPINE2	0.0383948	30659.7	0.0122464	7
	RASGRP1	0.0384965	19333.4	0.00619479	10		PRKG1	0.0384787	9308.26	0.00273381	6
	WDR35	0.0385258	28236.4	0.0122575	32		RASGRP1	0.0384965	19333.4	0.00619479	10
	DAP	0.0385315	12133	0.00248387	3		INPP5B	0.0385003	28596.1	0.00942262	11
	SLC2A14	0.038639	3286.72	0.000725036	2		WDR35	0.0385258	28236.4	0.0122575	32
	ITCH	0.0387223	1078.05	0.000269781	3		DAP	0.0385315	12133	0.00248387	3
	GPR50	0.0387858	4169.25	0.00116897	7		SLC2A14	0.038639	3286.72	0.000725036	2
	AGTPBP1	0.0388065	36323.4	0.0130505	17		GPR50	0.0387858	4169.25	0.00116897	7
	LY6K	0.0388629	5570.35	0.00214529	9		LY6K	0.0388629	5570.35	0.00214529	9
	C5orf4	0.038882	15267.8	0.00537763	11		C5orf4	0.038882	15267.8	0.00537763	11
	PSAT1	0.0389107	4134.73	0.00137897	6		IQGAP1	0.0388839	45117.2	0.0191071	24
	SGSM1	0.0389328	40370.1	0.0172613	24		PSAT1	0.0389107	4134.73	0.00137897	6
	ZNF382	0.0389621	2496.67	0.000615401	3		SGSM1	0.0389328	40370.1	0.0172613	24
	SERPINE2	0.0389768	30668.7	0.0123632	8		DIP2A	0.0390539	32031.1	0.0140147	31
	CEP76	0.0389869	11421.3	0.00400134	8		ZFHX4	0.0391337	78723.9	0.0409303	30
	DIP2A	0.0390539	32031.1	0.0140147	31		ISOC2	0.0391407	7243.6	0.00206148	6
	ISOC2	0.0391407	7243.6	0.00206148	6		NTRK1	0.0391474	33597.6	0.0162685	17
	REM2	0.0391992	6772.13	0.00215324	8		PRMT5	0.0391981	1009.88	0.000211155	3
	ZFHX4	0.0392686	78865.5	0.0410741	31		REM2	0.0391992	6772.13	0.00215324	8
	D2HGDH	0.0392704	25048.8	0.0107707	10		D2HGDH	0.0392704	25048.8	0.0107707	10
	RND1	0.0393355	6053.7	0.0018213	6		RND1	0.0393355	6053.7	0.0018213	6
	CPEB1	0.0393777	11239.3	0.00345704	8		CPEB1	0.0393777	11239.3	0.00345704	8
	ABHD2	0.0393865	28939.5	0.0081085	7		PTPRN	0.0394249	10372.6	0.00469214	17
	PTPRN	0.0394249	10372.6	0.00469214	17		NT5C3	0.0395114	6383.37	0.00222159	4
	NT5C3	0.0395114	6383.37	0.00222159	4		FGFR1OP	0.0395501	35517.4	0.0168715	11
	FGFR1OP	0.0395501	35517.4	0.0168715	11		C9orf173	0.0395714	10685.5	0.00340244	8
	INTS3	0.0395648	6630.82	0.00277212	5		RAB3C	0.0395732	1356.89	0.000405894	5
	RAB3C	0.0395732	1356.89	0.000405894	5		ZC3H11A	0.0396528	6958.81	0.00223379	10
	ZC3H11A	0.0396528	6958.81	0.00223379	10		ZW10	0.0396833	19466.8	0.00806859	22
	NTRK1	0.039721	33658.1	0.016397	18		CISH	0.0397287	11978.9	0.00300429	8
	FAM175B	0.0397268	8717.38	0.00278269	6		AVIL	0.0397467	34761.6	0.0137689	25
	MRVI1	0.0397876	66686.4	0.0347319	27		GRM8	0.0398689	27109.4	0.0100729	15
	GRM8	0.0398689	27109.4	0.0100729	15		TEFM	0.0398759	14625.2	0.00395813	5
	TEFM	0.0398759	14625.2	0.00395813	5		TRIM39	0.0399428	4023.97	0.00157938	8
	TRIM39	0.0399428	4023.97	0.00157938	8		SIRT1	0.0399879	33000.7	0.0102509	7
	SIRT1	0.0399879	33000.7	0.0102509	7		ALS2CR8	0.0400326	35912.5	0.0120905	13
	ALS2CR8	0.0400326	35912.5	0.0120905	13		LRG1	0.04006	33381.7	0.0116175	17
	LRG1	0.04006	33381.7	0.0116175	17		TRMT5	0.0400708	30452.8	0.0138175	18
	VGLL2	0.0401177	1335.71	0.000343657	3		VGLL2	0.0401177	1335.71	0.000343657	3
	KHDRBS2	0.0401356	13580.5	0.00514571	10		KHDRBS2	0.0401356	13580.5	0.00514571	10
	ATG12	0.040204	899.189	0.000206392	2		TRIM22	0.0401984	52549.6	0.0225261	17
	KIAA1609	0.0403752	90221.1	0.0494972	37		ATG12	0.040204	899.189	0.000206392	2
	NOXA1	0.0404786	38622.9	0.0175376	9		MRVI1	0.0403224	66386.1	0.0346501	26
	C6orf162	0.0405896	21346.7	0.0057147	5		KIAA1609	0.0403752	90221.1	0.0494972	37
	KITLG	0.0406119	1460.27	0.000302358	4		NOXA1	0.0404786	38622.9	0.0175376	9
	MPZL2	0.0406513	23238.5	0.0066344	12		C6orf162	0.0405896	21346.7	0.0057147	5
	AGBL5	0.0406706	40719.2	0.0159604	20		KITLG	0.0406119	1460.27	0.000302358	4
	STK31	0.0408443	54433.5	0.0246798	27		MPZL2	0.0406513	23238.5	0.0066344	12
	PPBP	0.0408637	364.463	9.03984e-05	2		AGBL5	0.0406706	40719.2	0.0159604	20
	PAX5	0.0408832	19976.2	0.0068839	5		CCBP2	0.0407628	18926.4	0.0065583	9
	GNPTAB	0.0409167	48605.3	0.021052	22		STK31	0.0408443	54433.5	0.0246798	27
	TMEM131	0.0409607	27722.6	0.012486	31		PPBP	0.0408637	364.463	9.03984e-05	2
	PSORS1C2	0.0409619	21569.4	0.00850897	6		PAX5	0.0408832	19976.2	0.0068839	5
	FAM82A2	0.0410126	6268.56	0.0015393	5		GNPTAB	0.0409167	48605.3	0.021052	22
	MRPS18B	0.0410221	1966.13	0.000747931	4		PSORS1C2	0.0409619	21569.4	0.00850897	6
	GPM6B	0.0410744	15016.1	0.0035422	3		MRPS18B	0.0410221	1966.13	0.000747931	4
	CDKL5	0.0412242	30086.1	0.00837578	5		GPM6B	0.0410744	15016.1	0.0035422	3
	CASP8AP2	0.0412385	42953.1	0.0201629	26		TMEM131	0.0411647	27658.7	0.012456	30
	TRIM22	0.0412387	52937.3	0.0230344	18		DKK1	0.0411749	20115	0.00565106	5
	IKBKE	0.0412494	22156.9	0.00894708	16		CDKL5	0.0412242	30086.1	0.00837578	5
	TREM2	0.0412689	11109	0.00311677	9		IKBKE	0.0412494	22156.9	0.00894708	16
	ANP32C	0.0412818	27747.4	0.00860898	6		TREM2	0.0412689	11109	0.00311677	9
	LRRTM1	0.0413325	23031.1	0.00745052	8		ANP32C	0.0412818	27747.4	0.00860898	6
	TOPORS	0.0413958	50641.3	0.022899	21		LRRTM1	0.0413325	23031.1	0.00745052	8
	FBXO8	0.0415533	22586.9	0.00612626	4		CASP8AP2	0.0413522	42754.1	0.020031	25
	INPP5B	0.0416304	28762	0.0112107	15		TOPORS	0.0415528	50568.9	0.0228815	20
	PTPRZ1	0.0416463	38743.6	0.01862	44		FBXO8	0.0415533	22586.9	0.00612626	4
	ARHGAP15	0.0417801	4863.13	0.00161776	10		INS-IGF2	0.0415632	1111.8	0.00031076	3
	KRTAP19-7	0.041837	4364.46	0.00104583	3		PARP15	0.0415693	80789.6	0.0342254	18
	PPFIA2	0.0419138	39683	0.0138112	11		PCDHB9	0.0417261	19842	0.00531218	3
	ARMCX1	0.0419934	1376.4	0.000253669	2		ARHGAP15	0.0417801	4863.13	0.00161776	10
	FAM26E	0.0419981	14283.8	0.00350755	8		KRTAP19-7	0.041837	4364.46	0.00104583	3
	RALGPS1	0.04201	37033.6	0.0117244	5		COG1	0.0419198	40446.3	0.0146887	14
	NBEAL2	0.0420468	43385.6	0.0219509	48		ARMCX1	0.0419934	1376.4	0.000253669	2
	CLPSL1	0.0421285	899.688	0.000198622	2		FAM26E	0.0419981	14283.8	0.00350755	8
	HINT3	0.0421656	14198.1	0.00320611	6		RALGPS1	0.04201	37033.6	0.0117244	5
	COG1	0.0423502	40573.2	0.0148931	16		KRT34	0.0420104	10520.9	0.00418984	7
	ATPAF2	0.0424074	35369.8	0.0117391	7		NBEAL2	0.0420468	43385.6	0.0219509	48
	PARP14	0.0424349	49158.2	0.0228482	18		CLPSL1	0.0421285	899.688	0.000198622	2
	LCN9	0.0425075	30862.1	0.0106381	7		HINT3	0.0421656	14198.1	0.00320611	6
	MAP7	0.0425583	54591.2	0.018516	24		UQCRB	0.042413	1282.29	0.000327131	2
	LPGAT1	0.0426377	2128.25	0.000509304	3		LCN9	0.0425075	30862.1	0.0106381	7
	C3orf26	0.0426445	10251.8	0.00264876	5		SAPCD1	0.0425312	45884.3	0.0230304	11
	PRRX1	0.0426459	8139.22	0.00269221	6		MAP7	0.0425343	54583.8	0.0185023	22
	BEND2	0.0426928	58473.3	0.0208263	8		LPGAT1	0.0426377	2128.25	0.000509304	3
	OR52A1	0.0426958	15180.8	0.00402924	8		C3orf26	0.0426445	10251.8	0.00264876	5
	BBOX1	0.0427717	27952.9	0.00835259	8		PRRX1	0.0426459	8139.22	0.00269221	6
	SLC32A1	0.0428967	18009.7	0.00634475	5		BEND2	0.0426928	58473.3	0.0208263	8
	GALNT4	0.0429031	45109.5	0.0183488	11		OR52A1	0.0426958	15180.8	0.00402924	8
	TTC17	0.042948	14868.8	0.00570741	29		BBOX1	0.0427717	27952.9	0.00835259	8
	FAM129B	0.043032	18538.9	0.00690643	17		CNDP2	0.042854	20391.2	0.00713932	7
	PCSK5	0.0430572	79360.1	0.0431316	25		SLC32A1	0.0428967	18009.7	0.00634475	5
	CCDC60	0.0430657	48423.7	0.0220778	23		GALNT4	0.0429031	45109.5	0.0183488	11
	ZW10	0.0430721	19474.2	0.0083083	23		PPFIA2	0.0429348	39116.4	0.0136007	10
	DARS	0.0430843	16836.4	0.0066908	7		FAM129B	0.043032	18538.9	0.00690643	17
	DHX58	0.0431004	8055.22	0.00322234	24		CCDC60	0.0430657	48423.7	0.0220778	23
	IQGAP1	0.0431382	45125.6	0.0198315	25		DARS	0.0430843	16836.4	0.0066908	7
	RBM47	0.0431869	26287	0.00658366	7		DHX58	0.0431004	8055.22	0.00322234	24
	MCL1	0.0432222	27089.1	0.0100313	10		PCSK5	0.0431854	79227	0.0430615	24
	LMF1	0.0434341	72269.9	0.041469	26		RBM47	0.0431869	26287	0.00658366	7
	ASF1B	0.0435919	1239.89	0.00028626	2		KPRP	0.0432527	69318.2	0.0332864	19
	NIPAL3	0.0436643	15964	0.00554002	8		HTR6	0.0433105	12315.6	0.00318136	3
	KCTD1	0.0436876	4519.94	0.00132718	4		RASGRF1	0.0435196	25729	0.00970042	14
	TSR1	0.0437046	54616	0.0240963	17		ASF1B	0.0435919	1239.89	0.00028626	2
	ST5	0.0437347	33740.6	0.0110713	14		NIPAL3	0.0436643	15964	0.00554002	8
	PARP8	0.0437771	8779.46	0.00266159	16		KCTD1	0.0436876	4519.94	0.00132718	4
	SLC25A25	0.0437785	29001.6	0.0127486	7		TSR1	0.0437046	54616	0.0240963	17
	RXRB	0.0439291	2031.43	0.000674082	3		ST5	0.0437347	33740.6	0.0110713	14
	BCL11B	0.0439846	3717.92	0.00106418	2		SLC25A25	0.0437785	29001.6	0.0127486	7
	WAS	0.0441282	36045.7	0.0108572	4		RXRB	0.0439291	2031.43	0.000674082	3
	CERS5	0.0442064	29041.1	0.00828889	13		BCL11B	0.0439846	3717.92	0.00106418	2
	FCRL6	0.0442394	15793.7	0.0057465	15		PTPRC	0.0440429	46221.2	0.0239752	29
	PTPRC	0.0443351	46268.8	0.0240629	30		WAS	0.0441282	36045.7	0.0108572	4
	LIPI	0.04437	44928.7	0.0178917	9		CERS5	0.0442064	29041.1	0.00828889	13
	SLC30A5	0.0443737	35629.4	0.0174863	13		FCRL6	0.0442394	15793.7	0.0057465	15
	TPBG	0.0443806	12426.9	0.00345899	5		LIPI	0.04437	44928.7	0.0178917	9
	FSTL4	0.0444549	36975.2	0.0138198	23		SLC30A5	0.0443737	35629.4	0.0174863	13
	POMT1	0.0445397	35893.1	0.0150698	21		NAPRT1	0.0444097	33626.8	0.0139254	14
	PDCL2	0.0445604	10746.8	0.00256195	3		FSTL4	0.0444549	36975.2	0.0138198	23
	RMI2	0.0445895	4544.38	0.00113337	3		MAP3K2	0.0445218	13643.7	0.00401785	6
	L2HGDH	0.0446294	13885.8	0.0048959	8		POMT1	0.0445397	35893.1	0.0150698	21
	STIP1	0.0446838	3409.69	0.000905483	3		PDCL2	0.0445604	10746.8	0.00256195	3
	HUS1	0.0447026	39226	0.0151521	8		RMI2	0.0445895	4544.38	0.00113337	3
	CDK13	0.0447621	44864	0.0208304	19		L2HGDH	0.0446294	13885.8	0.0048959	8
	SLC22A24	0.0447956	16601.3	0.00470631	3		CASP1	0.0446625	16772.3	0.00541872	9
	PPP1R12A	0.0448272	7570.11	0.00297588	10		STIP1	0.0446838	3409.69	0.000905483	3
	STK19	0.0448572	7913.66	0.00242526	4		HUS1	0.0447026	39226	0.0151521	8
	ZG16B	0.0448684	20079.5	0.00536539	5		CDK13	0.0447621	44864	0.0208304	19
	SARS	0.0448704	14464.8	0.00346137	7		SLC22A24	0.0447956	16601.3	0.00470631	3
	C19orf75	0.0450017	7404.67	0.00246846	8		PPP1R12A	0.0448272	7570.11	0.00297588	10
	WHAMM	0.0452515	11864.6	0.00455552	12		STK19	0.0448572	7913.66	0.00242526	4
	KIAA2022	0.0452661	23307.5	0.00719912	13		TPBG	0.0448607	12266.2	0.0032853	3
	ATP5J2	0.0452775	10514.8	0.00224942	2		ZG16B	0.0448684	20079.5	0.00536539	5
	LSM14A	0.0453071	6794.87	0.00184613	4		SARS	0.0448704	14464.8	0.00346137	7
	GFM2	0.0453876	28636.9	0.0117464	22		ATPAF2	0.0449788	32569.5	0.0102949	6
	METTL19	0.0454449	60864.1	0.0301158	19		C19orf75	0.0450017	7404.67	0.00246846	8
	DLGAP4	0.0454863	21269.9	0.00999833	18		WHAMM	0.0452515	11864.6	0.00455552	12
	MSH5-SAPCD1	0.0454957	27779.1	0.0115711	2		KIAA2022	0.0452661	23307.5	0.00719912	13
	NCAPD2	0.0455128	50523.5	0.0260116	31		ATP5J2	0.0452775	10514.8	0.00224942	2
	DNAH7	0.0455768	205593	0.140049	116		LSM14A	0.0453071	6794.87	0.00184613	4
	PPM1J	0.0457022	29121.5	0.0107931	9		GFM2	0.0453876	28636.9	0.0117464	22
	CGN	0.0457084	69397	0.0351764	44		METTL19	0.0454449	60864.1	0.0301158	19
	FBN3	0.0458097	156283	0.105166	117		SLA2	0.0455127	25778.7	0.0107824	8
	TRIM41	0.0458674	25554.1	0.0118789	10		NCAPD2	0.0455128	50523.5	0.0260116	31
	GYG1	0.0459162	15546.3	0.00639267	8		PPM1J	0.0457022	29121.5	0.0107931	9
	CACNA2D4	0.0460279	80223.4	0.0408826	39		CGN	0.0457084	69397	0.0351764	44
	ASMT	0.0461671	9397	0.00591997	8		TRIM41	0.0458674	25554.1	0.0118789	10
	MN1	0.0462368	22169.6	0.00781504	6		GYG1	0.0459162	15546.3	0.00639267	8
	CDH23	0.0462629	152325	0.102208	89		FGR	0.0459975	3025.05	0.00110028	4
	AGAP2	0.0464223	35291.9	0.0151756	12		CACNA2D4	0.0460279	80223.4	0.0408826	39
	FICD	0.0464716	42602.8	0.0179063	10		ASMT	0.0461671	9397	0.00591997	8
	MAP3K8	0.0464892	4588.37	0.00117555	5		MN1	0.0462368	22169.6	0.00781504	6
	TTLL10	0.0464921	69872.4	0.0339056	24		KDM2B	0.0463242	32569.1	0.0147757	10
	PARP3	0.0465466	54029.2	0.0251999	21		AGAP2	0.0464223	35291.9	0.0151756	12
	SLC22A13	0.0465891	54093.4	0.0228499	22		FICD	0.0464716	42602.8	0.0179063	10
	LONRF2	0.0466043	36431.8	0.0122198	9		PARP3	0.0464823	54029.2	0.0251824	20
	DKK1	0.0466461	20124.2	0.00621188	6		MAP3K8	0.0464892	4588.37	0.00117555	5
	KEAP1	0.046654	2427.01	0.000653798	5		TTLL10	0.0464921	69872.4	0.0339056	24
	ATP5C1	0.0466842	1855.69	0.000557069	3		SLC22A13	0.0465891	54093.4	0.0228499	22
	CLDN2	0.0467141	3751.36	0.000891007	4		LONRF2	0.0466043	36431.8	0.0122198	9
	NUBPL	0.046742	33801.1	0.012519	9		KEAP1	0.046654	2427.01	0.000653798	5
	SF3B1	0.0468457	3724.02	0.000864568	2		AKAP10	0.0466608	24952.2	0.00851087	8
	THAP1	0.046878	1083.65	0.000268719	2		ATP5C1	0.0466842	1855.69	0.000557069	3
	LRRC37A3	0.0471056	28223.6	0.0109253	4		CLDN2	0.0467141	3751.36	0.000891007	4
	ATP10B	0.0472541	82690	0.0446091	48		NUBPL	0.046742	33801.1	0.012519	9
	BCKDHA	0.0472576	36513	0.0126931	8		TCTE1	0.0468318	36834.7	0.016418	20
	2014-09-01	0.047284	27223.8	0.012344	8		SF3B1	0.0468457	3724.02	0.000864568	2
	CLEC6A	0.0473006	47499.2	0.0212138	7		THAP1	0.046878	1083.65	0.000268719	2
	MRPL12	0.0473605	30150.7	0.00836963	2		LRRC37A3	0.0471056	28223.6	0.0109253	4
	MAP3K2	0.0473936	14992.3	0.00508595	9		MYO18A	0.04714	40939.4	0.018738	22
	GPER	0.0474189	26636.3	0.00913089	8		ATP10B	0.0472541	82690	0.0446091	48
	ATG16L2	0.0474545	29738.4	0.013402	14		BCKDHA	0.0472576	36513	0.0126931	8
	ODZ2	0.047646	87819.3	0.0552026	40		2014-09-01	0.047284	27223.8	0.012344	8
	UCK1	0.047714	1572.61	0.00036683	2		CLEC6A	0.0473006	47499.2	0.0212138	7
	LETM2	0.0478386	30670.9	0.0133851	15		MRPL12	0.0473605	30150.7	0.00836963	2
	KPRP	0.0478714	69328.3	0.0343671	20		ODZ2	0.0473745	87618.5	0.0547629	36
	PPWD1	0.0479246	8593.18	0.00379884	14		GPER	0.0474189	26636.3	0.00913089	8
	IL1RL1	0.0479811	60563.1	0.0292842	23		ATG16L2	0.0474545	29738.4	0.013402	14
	WDR52	0.048019	56219.7	0.0297553	26		IFRD2	0.0476241	55489.6	0.0248503	16
	PUM1	0.0481668	12732	0.00435284	12		UCK1	0.047714	1572.61	0.00036683	2
	KIAA1161	0.0482364	9139.78	0.00389104	10		RNF213	0.0477174	180284	0.119511	121
	CD99L2	0.0483328	10187.8	0.00279006	5		LETM2	0.0478386	30670.9	0.0133851	15
	LZTFL1	0.0483556	19309.2	0.00693622	6		CEP63	0.0479093	16215.8	0.00639124	18
	MCM9	0.0484233	75096.7	0.0382009	21		IL1RL1	0.0479811	60563.1	0.0292842	23
	DCTN4	0.0484362	5781.58	0.00194078	10		WDR52	0.048019	56219.7	0.0297553	26
	RTN1	0.0487011	43505.4	0.0194738	16		SMC6	0.0482194	12012.8	0.00311486	6
	CNNM3	0.0487322	21351.1	0.0103137	10		KIAA1161	0.0482364	9139.78	0.00389104	10
	MYO18A	0.0487378	41880.1	0.0199611	24		CD99L2	0.0483328	10187.8	0.00279006	5
	OR4D5	0.0487695	23583.1	0.0101416	15		LZTFL1	0.0483556	19309.2	0.00693622	6
	CASP1	0.0487841	18080.3	0.00679172	10		LMAN2	0.0483771	26823.9	0.0100736	8
	DBP	0.048806	24951	0.0066445	2		MCM9	0.0484233	75096.7	0.0382009	21
	CDCA4	0.0488422	23388.1	0.00801861	2		DCTN4	0.0484362	5781.58	0.00194078	10
	LMAN2	0.0489987	26824.8	0.0101671	9		ULK2	0.0485351	31027.3	0.0120429	15
	RXFP3	0.0490402	4967.77	0.00201909	10		ARG2	0.0486104	32449.5	0.0115036	8
	ULK2	0.0490429	31042.9	0.0121315	16		ACP6	0.0487224	35050.8	0.0132926	12
	TIMM8A	0.0491389	100.446	3.00583e-05	2		CNNM3	0.0487322	21351.1	0.0103137	10
	GPATCH8	0.0491836	28559.7	0.0118001	21		OR4D5	0.0487695	23583.1	0.0101416	15
	TIMM17A	0.049196	2156.15	0.000566655	3		DBP	0.048806	24951	0.0066445	2
	HIST1H4C	0.0492089	1821.62	0.000362217	2		CDCA4	0.0488422	23388.1	0.00801861	2
	LHPP	0.0492351	14019.3	0.00453065	12		MUSTN1	0.0488834	10493.3	0.003044	5
	ARHGEF19	0.0492891	14251.1	0.00587508	11		MED16	0.0489596	41490	0.023553	23
	ARG2	0.0492964	32476.6	0.0118907	12		RXFP3	0.0490402	4967.77	0.00201909	10
	ABI1	0.0493768	7777.5	0.00245955	4		SLC5A10	0.0490597	1645.27	0.000546159	6
	NAPRT1	0.0493795	33850.9	0.0148887	15		TIMM8A	0.0491389	100.446	3.00583e-05	2
	OR5V1	0.0493802	20420.9	0.0135312	10		GPATCH8	0.0491836	28559.7	0.0118001	21
	RNF19A	0.0493811	10450.1	0.00395366	11		TIMM17A	0.049196	2156.15	0.000566655	3
	MBD4	0.0496615	55115.5	0.0268518	14		HIST1H4C	0.0492089	1821.62	0.000362217	2
	CSPG4	0.0497619	29637.6	0.0108258	17		LHPP	0.0492351	14019.3	0.00453065	12
	RIMKLA	0.0498687	497.62	0.000116845	2		ARHGEF19	0.0492891	14251.1	0.00587508	11
	C1QTNF2	0.049879	4192.41	0.00143599	6		OR5V1	0.0493802	20420.9	0.0135312	10
	ICOSLG	0.0498872	19708.8	0.00709587	11		RNF19A	0.0493811	10450.1	0.00395366	11
	WFDC6	0.0499057	2344.29	0.000666017	3		MBD4	0.0496615	55115.5	0.0268518	14
	MED16	0.0499202	41846.2	0.0240967	24		RTN1	0.0497339	42793.4	0.0190117	15
	KRT34	0.0499233	10580.2	0.00455425	8		CSPG4	0.0497619	29637.6	0.0108258	17
							RIMKLA	0.0498687	497.62	0.000116845	2
							C1QTNF2	0.049879	4192.41	0.00143599	6
							ICOSLG	0.0498872	19708.8	0.00709587	11
							WFDC6	0.0499057	2344.29	0.000666017	3
							FAM69C	0.0499649	25950.9	0.00920075	7

## Sheet: 5. T1-burden analyses
	Table S5: T1-burden analyses
	EA+AA, T1 Burden, all variants, MAF range 0.00 - 0.01							EA+AA, T1 Burden, nonsynonymous and splice variants only, MAF range 0.00 - 0.01							EA+AA, T1 Burden, damaging variants only, MAF range 0.00 - 0.01
	gene	p	beta	se	cmaf	nsnps		gene	p	beta	se	cmaf	nsnps		gene	p	beta	se	cmaf	nsnps
	CSRP3	1.90276e-05	1.32408	0.309653	0.00482619	4		CSRP3	1.90276e-05	1.32408	0.309653	0.00482619	4		CSRP3	9.64732e-06	1.3794	0.311734	0.00476193	3
	TRAPPC12	3.18312e-05	-0.905068	0.217567	0.0115871	18		ISM1	2.33864e-05	1.49266	0.35289	0.00387954	6		CLEC4F	2.58409e-05	-1.16465	0.276814	0.00653608	5
	S100A5	0.000102738	1.04583	0.269264	0.00751545	2		TRAPPC12	3.18312e-05	-0.905068	0.217567	0.0115871	18		ISM1	5.05328e-05	1.46626	0.361759	0.0036984	5
	SLC18B1	0.000160645	-0.838659	0.22222	0.00985182	17		S100A5	0.000102738	1.04583	0.269264	0.00751545	2		CSPG4	0.000211814	-2.78519	0.75184	0.000837508	6
	RABEP2	0.000215851	1.79477	0.485113	0.00199315	6		SLC18B1	0.000160645	-0.838659	0.22222	0.00985182	17		TRIM7	0.000269972	0.767025	0.210575	0.0116216	7
	TRIM7	0.000239395	0.547579	0.149068	0.0156445	13		TRIM7	0.000239395	0.547579	0.149068	0.0156445	13		CSAD	0.000275039	-1.04012	0.285926	0.00601085	9
	CSMD2	0.000344915	0.313824	0.0876849	0.0595844	75		CSMD2	0.000279825	0.32141	0.0884624	0.0591518	73		C14orf182	0.000392005	2.37372	0.669519	0.00141517	2
	PAH	0.000357724	-0.879342	0.246352	0.00799492	16		PAH	0.000357724	-0.879342	0.246352	0.00799492	16		NDUFB10	0.000409248	-4.09881	1.15981	0.000377155	2
	ISM1	0.000379703	1.13096	0.318238	0.00420668	7		C14orf182	0.000392005	2.37372	0.669519	0.00141517	2		UNC5B	0.000416266	0.499294	0.141461	0.0192005	17
	TIRAP	0.000396631	0.886737	0.250327	0.00780101	10		TIRAP	0.000396631	0.886737	0.250327	0.00780101	10		DAZL	0.000532874	7.34268	2.11992	0.000100191	3
	DDX27	0.000406736	-0.854818	0.24177	0.00638602	15		CSPG4	0.000419269	-0.749678	0.212515	0.0108258	17		BSG	0.0005466	3.0818	0.891515	0.000657268	4
	CSPG4	0.000419269	-0.749678	0.212515	0.0108258	17		RABEP2	0.000452689	1.77908	0.50725	0.00183541	5		GLB1L3	0.000566756	-0.644312	0.186917	0.0144924	5
	MLLT4	0.000501141	0.587277	0.168751	0.0170193	35		B4GALT7	0.000552252	-1.03874	0.300733	0.00522024	9		TFR2	0.000652592	0.608277	0.178445	0.0160019	13
	B4GALT7	0.000552252	-1.03874	0.300733	0.00522024	9		IMPA2	0.000581075	0.948691	0.275758	0.00942149	6		B4GALT7	0.000800526	-1.04343	0.311228	0.00488141	7
	IMPA2	0.000581075	0.948691	0.275758	0.00942149	6		DDX27	0.000598091	-0.832664	0.242584	0.00631592	14		TMEM61	0.000842612	2.07972	0.622967	0.00123286	3
	CSAD	0.00062547	-0.856228	0.250335	0.00775397	15		CSAD	0.00062547	-0.856228	0.250335	0.00775397	15		MNT	0.000920245	-2.46355	0.743412	0.000882558	3
	NDUFB10	0.000679509	-3.80589	1.12013	0.000400579	3		NDUFB10	0.000679509	-3.80589	1.12013	0.000400579	3		RHPN1	0.000922153	-3.22677	0.973897	0.000549668	2
	UHMK1	0.00070528	1.14254	0.337279	0.00433004	6		UHMK1	0.00070528	1.14254	0.337279	0.00433004	6		GPR61	0.0010111	5.1387	1.56314	0.000222008	2
	SYT14	0.000736792	1.38273	0.409635	0.00277957	9		SYT14	0.000736792	1.38273	0.409635	0.00277957	9		CSMD2	0.00103327	0.359932	0.109692	0.0432714	53
	NUBPL	0.000817775	0.661774	0.197739	0.012519	9		NUBPL	0.000817775	0.661774	0.197739	0.012519	9		PRKAG2	0.0010443	1.05407	0.321527	0.00532394	2
	OR51G1	0.000882756	-0.483409	0.145367	0.0232807	17		OR51G1	0.000882756	-0.483409	0.145367	0.0232807	17		MORC3	0.00106422	-1.1482	0.350814	0.00374034	3
	RPS6KL1	0.000936298	-1.05037	0.317429	0.00493559	13		MNT	0.000920245	-2.46355	0.743412	0.000882558	3		RFC1	0.00122043	-0.798405	0.246874	0.00971717	10
	PPP1R14D	0.00117752	-1.0395	0.320411	0.00449441	3		RPS6KL1	0.000936298	-1.05037	0.317429	0.00493559	13		CALN1	0.00124688	3.77377	1.1691	0.000379511	3
	RASGEF1A	0.00119333	-1.48374	0.457879	0.00253433	4		ACACB	0.00101756	0.413346	0.125804	0.0296405	52		POLR3G	0.00129171	4.27576	1.32878	0.000286797	2
	OR10A7	0.00120415	0.303108	0.0936127	0.0113374	15		OR10A7	0.00108482	0.306722	0.0938691	0.0110393	14		TBX15	0.00130414	0.871281	0.271	0.00645949	7
	TBX18	0.00122641	0.942872	0.29167	0.00573091	13		PPP1R14D	0.00117752	-1.0395	0.320411	0.00449441	3		TGM1	0.00130522	-0.502612	0.156342	0.0197107	22
	CALN1	0.00124688	3.77377	1.1691	0.000379511	3		RASGEF1A	0.00119333	-1.48374	0.457879	0.00253433	4		EPS15	0.0013967	-0.992616	0.310646	0.00496318	9
	ACACB	0.00124995	0.373365	0.115692	0.0350843	59		TBX18	0.00122641	0.942872	0.29167	0.00573091	13		IQCA1	0.0014349	-0.637369	0.199957	0.0120575	8
	GLB1L3	0.00131568	-0.486179	0.151338	0.0211492	16		CALN1	0.00124688	3.77377	1.1691	0.000379511	3		C12orf65	0.00144319	-3.77589	1.1852	0.000333002	2
	SEC62	0.00132516	1.23612	0.385026	0.00316826	4		GLB1L3	0.00131568	-0.486179	0.151338	0.0211492	16		SGCE	0.0014488	-2.37213	0.744839	0.000888157	2
	PCDH12	0.0013702	0.356034	0.111231	0.0366252	33		SEC62	0.00132516	1.23612	0.385026	0.00316826	4		GSTM5	0.00146126	1.90165	0.597577	0.00145115	2
	UTS2	0.00143455	-1.10098	0.345393	0.00409448	5		PCDH12	0.0013702	0.356034	0.111231	0.0366252	33		ADAMTS6	0.00147952	-0.720463	0.226655	0.00966063	12
	C12orf65	0.00144319	-3.77589	1.1852	0.000333002	2		UTS2	0.00143455	-1.10098	0.345393	0.00409448	5		NRBP1	0.00156153	1.07576	0.340108	0.00441671	4
	SGCE	0.0014488	-2.37213	0.744839	0.000888157	2		C12orf65	0.00144319	-3.77589	1.1852	0.000333002	2		SEC62	0.00156349	1.22696	0.387955	0.00312152	3
	HSD3B2	0.00149797	0.965935	0.304224	0.00535971	3		SGCE	0.0014488	-2.37213	0.744839	0.000888157	2		AIFM2	0.00161889	-0.689678	0.218773	0.00975595	10
	NRBP1	0.00156153	1.07576	0.340108	0.00441671	4		HSD3B2	0.00149797	0.965935	0.304224	0.00535971	3		RAD51B	0.00165066	-1.29544	0.411668	0.00328957	5
	RNF186	0.0016528	0.678894	0.215767	0.0103325	10		NRBP1	0.00156153	1.07576	0.340108	0.00441671	4		UHMK1	0.00170206	1.20405	0.383721	0.00340211	2
	SNUPN	0.00168845	0.594385	0.189284	0.0135771	13		RNF186	0.0016528	0.678894	0.215767	0.0103325	10		C1orf131	0.00172108	1.00349	0.320138	0.00523961	4
	OSTN	0.00172695	2.15346	0.687223	0.000999131	2		SNUPN	0.00168845	0.594385	0.189284	0.0135771	13		EXT1	0.00196027	-2.82837	0.913501	0.000613689	3
	GPANK1	0.00178249	0.703312	0.225113	0.0117798	6		OSTN	0.00172695	2.15346	0.687223	0.000999131	2		GALNT2	0.00198306	1.34611	0.435244	0.00266224	7
	C10orf96	0.00179684	2.85327	0.91395	0.000588643	3		C10orf96	0.00179684	2.85327	0.91395	0.000588643	3		IFRD2	0.00201919	-0.528828	0.171286	0.0167467	10
	UNC5B	0.00184669	0.418266	0.134325	0.0221396	20		MTHFR	0.00180865	-0.631642	0.202451	0.0078198	14		CPA5	0.00205565	-1.12881	0.366252	0.0035774	11
	LRRIQ3	0.00192965	0.476749	0.153748	0.0248569	22		UNC5B	0.00184669	0.418266	0.134325	0.0221396	20		PAH	0.00220243	-0.782301	0.25553	0.00745678	14
	GPD1	0.00204554	0.604304	0.195977	0.0122542	15		LRRIQ3	0.00192965	0.476749	0.153748	0.0248569	22		ALDH1L1	0.00233913	0.509326	0.167354	0.0171722	29
	SCNN1B	0.00212922	-0.582422	0.189616	0.013984	21		VCAN	0.00195093	0.210987	0.068113	0.079694	79		GPD1	0.00238178	0.597923	0.196817	0.0121666	14
	FURIN	0.00226075	0.488334	0.159918	0.0199279	18		GALNT5	0.00200959	-0.519273	0.168114	0.0171702	21		NUBPL	0.00239426	0.624727	0.205746	0.0115418	8
	TINAG	0.00226693	0.510215	0.167129	0.0188485	14		GPD1	0.00204554	0.604304	0.195977	0.0122542	15		CCDC164	0.00243476	-0.593834	0.195899	0.0126593	15
	MTHFR	0.00229563	-0.613191	0.201109	0.00797754	15		OBSCN	0.00211872	0.136932	0.0445588	0.170159	181		TAF6	0.00247217	-1.20099	0.396794	0.00382679	5
	OBSCN	0.00232065	0.135178	0.0443819	0.171262	183		FURIN	0.00226075	0.488334	0.159918	0.0199279	18		MYL5	0.00258726	0.443759	0.147284	0.0213219	8
	SNX1	0.00243708	-1.0913	0.360039	0.00400536	4		TINAG	0.00226693	0.510215	0.167129	0.0188485	14		SYT14	0.00262635	1.54192	0.512541	0.00174691	7
	SLC40A1	0.00251782	0.76273	0.25246	0.00811492	9		ODZ2	0.00237104	0.30489	0.100315	0.0547629	36		C14orf93	0.00264117	-1.28257	0.426572	0.00306034	4
	ALDH1L1	0.0025755	0.493641	0.163765	0.0182048	34		SLC40A1	0.00251782	0.76273	0.25246	0.00811492	9		LHPP	0.00270484	1.27188	0.424039	0.00266683	9
	SSX5	0.00258628	0.985498	0.327075	0.00286223	5		ALDH1L1	0.0025755	0.493641	0.163765	0.0182048	34		HGF	0.00290676	-1.10662	0.37167	0.00341751	3
	IL17RE	0.00272201	0.311117	0.103792	0.0384532	17		SSX5	0.00258628	0.985498	0.327075	0.00286223	5		GPRIN1	0.00302052	-3.7782	1.27399	0.000280419	2
	MIS18A	0.00273559	-1.21317	0.404931	0.00306935	6		TLL1	0.00264553	1.0228	0.340234	0.00420705	13		PKP4	0.00332862	-0.616575	0.210031	0.0109585	20
	KCTD1	0.00278942	-2.03945	0.682081	0.00132718	4		MLLT4	0.00269247	0.554302	0.184717	0.0152439	31		CTSZ	0.00342274	-0.758824	0.259252	0.00706277	2
	C22orf15	0.00283325	1.2852	0.430512	0.0028308	5		IL17RE	0.00272201	0.311117	0.103792	0.0384532	17		SPP1	0.00343721	1.0145	0.346758	0.00390522	5
	WAS	0.00284066	0.592179	0.19842	0.0108572	4		MIS18A	0.00273559	-1.21317	0.404931	0.00306935	6		ZCCHC16	0.00344905	-3.99856	1.36722	0.000220075	2
	UGT2B4	0.00284172	-0.64711	0.216834	0.0112624	13		KCTD1	0.00278942	-2.03945	0.682081	0.00132718	4		MYF6	0.00345806	0.983204	0.336278	0.00415058	5
	LINGO3	0.0028455	2.0288	0.679904	0.00120901	2		C22orf15	0.00283325	1.2852	0.430512	0.0028308	5		DDX27	0.00349895	-1.0929	0.374266	0.00345937	10
	RFX1	0.00284775	0.548999	0.183999	0.0149692	16		WAS	0.00284066	0.592179	0.19842	0.0108572	4		SERPINF1	0.00368563	-1.34529	0.463271	0.0022378	10
	ZFYVE27	0.00297069	-0.753779	0.253733	0.00870132	7		UGT2B4	0.00284172	-0.64711	0.216834	0.0112624	13		KIAA0020	0.00373493	-0.673113	0.23213	0.0102766	20
	OR52E4	0.00306619	-0.602769	0.203568	0.0105002	7		LINGO3	0.0028455	2.0288	0.679904	0.00120901	2		SSTR1	0.00378309	4.2327	1.46172	0.000224878	2
	PIP	0.00309226	-0.655459	0.221557	0.0115549	9		RFX1	0.00284775	0.548999	0.183999	0.0149692	16		FAM129B	0.00379567	-2.1321	0.736563	0.000829611	5
	STRADA	0.0031104	-1.10609	0.374109	0.00352257	7		ZFYVE27	0.00297069	-0.753779	0.253733	0.00870132	7		GCNT2	0.00385729	0.657789	0.22764	0.00906343	6
	TFR2	0.00317432	0.50076	0.16973	0.0176023	21		OR52E4	0.00306619	-0.602769	0.203568	0.0105002	7		INS-IGF2	0.00392763	4.69289	1.62726	0.000188083	2
	PTPRH	0.0031803	-0.398655	0.135149	0.0239161	35		PIP	0.00309226	-0.655459	0.221557	0.0115549	9		SSPN	0.00395147	-1.80728	0.62709	0.00121507	3
	FAM111A	0.00320192	0.556879	0.188923	0.0132058	16		STRADA	0.0031104	-1.10609	0.374109	0.00352257	7		CDH5	0.0040017	1.26865	0.440805	0.00247098	7
	NKAPL	0.00322777	-0.542697	0.184267	0.0145099	12		TFR2	0.00317432	0.50076	0.16973	0.0176023	21		ACACB	0.00417723	0.412844	0.144126	0.0226414	40
	ITLN1	0.00326635	-0.689136	0.234281	0.00890547	11		FAM111A	0.00320192	0.556879	0.188923	0.0132058	16		AMZ1	0.00426109	0.536196	0.187602	0.014034	19
	MYF6	0.00335088	0.929921	0.316993	0.00467636	6		NKAPL	0.00322777	-0.542697	0.184267	0.0145099	12		EIF4ENIF1	0.00426745	-0.724836	0.253645	0.00731176	12
	POLR3G	0.00337409	3.60923	1.23122	0.000335022	3		ITLN1	0.00326635	-0.689136	0.234281	0.00890547	11		EYA2	0.00426886	-0.761762	0.266576	0.00662618	9
	ADAM30	0.00338529	-0.483569	0.165018	0.0175087	17		MYF6	0.00335088	0.929921	0.316993	0.00467636	6		PSMB9	0.00430472	0.849748	0.297643	0.00653321	3
	VRK2	0.00352866	-0.56498	0.193653	0.0117159	16		SCNN1B	0.00335455	-0.560518	0.191092	0.0137912	20		PARP3	0.00438402	-0.652017	0.228848	0.00840937	14
	ODZ2	0.0036344	0.29001	0.0997193	0.0552026	40		POLR3G	0.00337409	3.60923	1.23122	0.000335022	3		TOP2A	0.00454812	-1.33795	0.471538	0.00260356	6
	C1orf51	0.00370129	0.983693	0.338905	0.00395472	7		CLEC4F	0.00337902	-0.236748	0.0807746	0.0464233	27		2009-09-01	0.0046096	-1.37024	0.48365	0.00227719	11
	CCDC164	0.00371379	-0.339083	0.116865	0.0313044	34		ADAM30	0.00338529	-0.483569	0.165018	0.0175087	17		POLI	0.00462691	0.802073	0.283226	0.00619155	9
	KDM4DL	0.00371848	-0.480649	0.165678	0.0199739	5		VRK2	0.00352866	-0.56498	0.193653	0.0117159	16		MEP1B	0.00462812	1.00557	0.355096	0.00387289	12
	SLCO1B7	0.00373145	-0.553448	0.190843	0.0141705	20		C1orf51	0.00370129	0.983693	0.338905	0.00395472	7		CUEDC1	0.00466452	1.95541	0.69112	0.00108006	2
	CLEC4F	0.00375821	-0.233323	0.0805182	0.0466736	28		CCDC164	0.00371379	-0.339083	0.116865	0.0313044	34		MFI2	0.0047213	0.542364	0.191956	0.0131415	21
	GALNT5	0.0038587	-0.478416	0.165571	0.0177197	22		KDM4DL	0.00371848	-0.480649	0.165678	0.0199739	5		ULK2	0.00475209	-0.96939	0.343344	0.00471695	11
	ACYP2	0.00388697	0.728518	0.252327	0.00792943	3		SLCO1B7	0.00373145	-0.553448	0.190843	0.0141705	20		OSBPL7	0.00482239	-0.695067	0.246595	0.00777395	9
	DBR1	0.00400013	-0.660493	0.229485	0.00913241	13		ACYP2	0.00388697	0.728518	0.252327	0.00792943	3		TPST1	0.00482484	-1.65402	0.586845	0.00136113	3
	ZNF766	0.00402544	0.740663	0.257518	0.00758563	10		DBR1	0.00400013	-0.660493	0.229485	0.00913241	13		AKAP7	0.00502493	0.994932	0.354645	0.00383935	5
	WSCD2	0.00405266	0.845819	0.294297	0.00593174	9		ZNF766	0.00402544	0.740663	0.257518	0.00758563	10		DYSF	0.00503623	0.40553	0.144589	0.0222485	66
	PARS2	0.004066	1.32906	0.462603	0.00229372	10		WSCD2	0.00405266	0.845819	0.294297	0.00593174	9		MAT2B	0.00507647	-3.29723	1.17668	0.000408379	2
	ZNF362	0.00411881	0.859453	0.299574	0.00589431	4		ZNF362	0.00411881	0.859453	0.299574	0.00589431	4		IRF5	0.00509848	9.30802	3.32341	4.92038e-05	2
	FEZF2	0.00426045	2.71351	0.949375	0.000529793	2		FEZF2	0.00426045	2.71351	0.949375	0.000529793	2		PLBD1	0.00522304	-0.732269	0.262185	0.00677645	2
	OXSR1	0.00428284	1.31322	0.459724	0.00220337	3		ASIC1	0.00427254	-1.25756	0.44012	0.00253804	2		C2orf47	0.00527475	2.61226	0.936374	0.000519978	2
	GSTP1	0.00429221	-1.23265	0.431623	0.0027658	7		OXSR1	0.00428284	1.31322	0.459724	0.00220337	3		KCNH8	0.00533457	1.19035	0.427247	0.0025492	5
	SLC5A5	0.00432348	-0.832165	0.291625	0.00588693	9		GSTP1	0.00429221	-1.23265	0.431623	0.0027658	7		CGN	0.00545136	0.390794	0.14062	0.0246774	26
	ASIC1	0.00432564	-1.24755	0.437217	0.00257309	3		PTPRH	0.0042987	-0.386656	0.135414	0.0237993	33		SLC22A24	0.00546555	0.910771	0.327824	0.00470631	3
	KCNH3	0.00433517	0.958217	0.3359	0.00442435	6		SLC5A5	0.00432348	-0.832165	0.291625	0.00588693	9		SNUPN	0.00554149	0.550949	0.19863	0.0122919	10
	ZNF595	0.00435826	2.84182	0.996783	0.000671713	4		KCNH3	0.00433517	0.958217	0.3359	0.00442435	6		ADAMTSL1	0.00563938	-0.87981	0.317845	0.00525721	19
	ESRP1	0.0043616	-1.38153	0.484618	0.00199968	5		ESRP1	0.0043616	-1.38153	0.484618	0.00199968	5		CMPK2	0.00567387	5.22043	1.88732	0.000139907	3
	CPA5	0.00439064	-0.713094	0.250328	0.00669703	17		CPA5	0.00439064	-0.713094	0.250328	0.00669703	17		FBN2	0.00576232	0.322981	0.116979	0.0360115	36
	WDR55	0.00440157	0.625664	0.219697	0.0100398	6		WDR55	0.00440157	0.625664	0.219697	0.0100398	6		PHACTR4	0.00578104	0.796931	0.288749	0.00593935	10
	HOXA9	0.00446264	0.976406	0.343387	0.00385095	7		TTC17	0.00442622	-0.931615	0.327334	0.00451644	22		FAM214B	0.00580349	1.48412	0.53798	0.00171504	6
	TPST1	0.00447891	-1.66087	0.58434	0.00137281	4		HOXA9	0.00446264	0.976406	0.343387	0.00385095	7		DAPK1	0.00582417	0.55946	0.202885	0.0115282	12
	UIMC1	0.00450594	-0.621395	0.218772	0.00972335	17		TPST1	0.00447891	-1.66087	0.58434	0.00137281	4		HEMGN	0.00588372	-2.3874	0.866825	0.000609509	3
	PLXNA3	0.00451024	-0.516524	0.18187	0.0136108	38		ZNF595	0.00448213	2.96751	1.04414	0.000627935	3		HMHA1	0.0058934	0.847377	0.307728	0.00512131	4
	CCDC64	0.00453434	-2.67918	0.943913	0.000554776	3		UIMC1	0.00450594	-0.621395	0.218772	0.00972335	17		RBM12	0.00590604	2.66428	0.96779	0.000523179	5
	UEVLD	0.00456532	-1.14645	0.404221	0.00343867	12		PLXNA3	0.00451024	-0.516524	0.18187	0.0136108	38		FIGNL1	0.00598622	-0.723736	0.263317	0.00672074	11
	METTL18	0.00458153	-0.671384	0.236814	0.0104034	10		CCDC64	0.00453434	-2.67918	0.943913	0.000554776	3		POP1	0.0059901	0.96189	0.349992	0.00420051	7
	PKP4	0.00464605	-0.516767	0.182564	0.0146663	28		UEVLD	0.00456532	-1.14645	0.404221	0.00343867	12		C12orf23	0.00599752	2.74127	0.997582	0.000488495	2
	RFC1	0.00465123	-0.472113	0.16681	0.0198175	23		METTL18	0.00458153	-0.671384	0.236814	0.0104034	10		CTSL2	0.00613403	1.881	0.686365	0.00101063	3
	VCAN	0.00477516	0.186363	0.0660436	0.0824119	80		PKP4	0.00464605	-0.516767	0.182564	0.0146663	28		GPR56	0.00619642	4.74948	1.73516	0.000343793	2
	ICA1	0.0047798	-0.887069	0.314395	0.00498681	12		RFC1	0.00465123	-0.472113	0.16681	0.0198175	23		OR52I1	0.00631186	2.41479	0.884174	0.000624567	2
	ZHX1	0.00482068	0.836473	0.29675	0.00524619	8		TGM1	0.00476488	-0.388688	0.13771	0.0254411	34		TSC22D1	0.00640438	0.746618	0.273855	0.00642967	11
	PLIN4	0.00483043	0.410651	0.145718	0.0235033	32		ICA1	0.0047798	-0.887069	0.314395	0.00498681	12		A1CF	0.00654817	-0.639581	0.235227	0.00891151	4
	MORC3	0.0049214	-0.895132	0.31831	0.00456421	8		ZHX1	0.00482068	0.836473	0.29675	0.00524619	8		NHLRC2	0.00659547	0.996614	0.36686	0.00360835	6
	ITGA3	0.00497418	-0.547543	0.194945	0.0130465	16		PLIN4	0.00483043	0.410651	0.145718	0.0235033	32		PDRG1	0.00659649	3.90834	1.43871	0.000239527	2
	GALNT4	0.0049853	-0.4383	0.156091	0.0183488	11		MORC3	0.0049214	-0.895132	0.31831	0.00456421	8		CCDC42	0.00660313	0.905479	0.33336	0.00427439	7
	TTC17	0.00499834	-0.790345	0.281548	0.00570741	29		ITGA3	0.00497418	-0.547543	0.194945	0.0130465	16		ICA1	0.00681518	-1.81791	0.671872	0.00104025	5
	EXOSC4	0.0051054	1.07197	0.382804	0.00319465	6		GALNT4	0.0049853	-0.4383	0.156091	0.0183488	11		GPR75	0.00683254	0.889344	0.32879	0.00449142	8
	RBM20	0.00513711	-0.34345	0.122735	0.0348185	13		ASPG	0.005035	-1.1622	0.414362	0.00359629	10		CIAO1	0.00685941	-1.04592	0.386861	0.00311298	7
	IL21R	0.00522163	0.406129	0.145408	0.0236362	9		EXOSC4	0.0051054	1.07197	0.382804	0.00319465	6		TINAG	0.00694469	1.18412	0.438646	0.00264989	8
	CNOT6	0.00531714	-1.09521	0.392947	0.0031364	9		RBM20	0.00513711	-0.34345	0.122735	0.0348185	13		DEPDC7	0.00697473	0.85632	0.317385	0.00474324	4
	PDGFRB	0.00537295	0.433336	0.155665	0.0213881	29		SLC26A9	0.00518051	0.296655	0.106115	0.0418945	25		SP7	0.00701279	-1.56331	0.579813	0.000861332	6
	SLC22A24	0.00546555	0.910771	0.327824	0.00470631	3		IL21R	0.00522163	0.406129	0.145408	0.0236362	9		OR10A7	0.00703182	0.770423	0.285836	0.0033541	5
	BLID	0.00548786	-0.777056	0.279828	0.00645759	6		CNTNAP4	0.0052911	-0.516053	0.185048	0.0140843	24		TEC	0.00711332	-1.37347	0.510299	0.0018296	5
	SLC26A9	0.00551973	0.293817	0.105879	0.0420581	26		CNOT6	0.00531714	-1.09521	0.392947	0.0031364	9		CASP1	0.00711548	-1.26213	0.468952	0.00225772	4
	2009-09-01	0.00552219	-0.979548	0.353006	0.0043399	16		PDGFRB	0.00537295	0.433336	0.155665	0.0213881	29		PCSK6	0.00723638	0.464648	0.173004	0.0156348	21
	IFNW1	0.00553889	0.854271	0.307968	0.00518522	6		RC3H1	0.00545294	-0.440883	0.158649	0.0205982	7		METTL18	0.00726356	-0.888326	0.330908	0.00574912	3
	HGF	0.00556235	-0.982954	0.354534	0.00377604	7		SLC22A24	0.00546555	0.910771	0.327824	0.00470631	3		ZNF468	0.00730501	3.5744	1.33243	0.000251765	3
	RC3H1	0.00561739	-0.437711	0.158057	0.0207442	8		CDH5	0.0054723	0.623589	0.224488	0.00936072	16		CENPK	0.00736642	-3.01227	1.12406	0.000368474	3
	KLC4	0.00571742	-0.738719	0.267307	0.00673646	13		BLID	0.00548786	-0.777056	0.279828	0.00645759	6		NKAPL	0.00757184	-0.655041	0.245279	0.00786669	5
	TMC5	0.00572395	0.386714	0.139952	0.0229128	31		2009-09-01	0.00552219	-0.979548	0.353006	0.0043399	16		TRAF5	0.00759963	1.34535	0.503996	0.00188118	4
	TMEM74B	0.00575444	-0.787119	0.285038	0.00592434	6		IFNW1	0.00553889	0.854271	0.307968	0.00518522	6		KIAA2026	0.00767251	-0.681391	0.255571	0.00738962	14
	KCNN2	0.00581169	4.55731	1.65227	0.000178944	2		HGF	0.00556235	-0.982954	0.354534	0.00377604	7		SCN5A	0.00776664	-0.412063	0.154792	0.025518	23
	CHRD	0.00582272	-0.690468	0.250387	0.00816475	18		KLC4	0.00571742	-0.738719	0.267307	0.00673646	13		ORAOV1	0.00782589	-3.54505	1.33298	0.000287441	2
	SRD5A2	0.00584425	0.835281	0.303034	0.00512727	6		TMC5	0.00572395	0.386714	0.139952	0.0229128	31		STRADA	0.0079241	-1.09944	0.414055	0.00291232	5
	VCP	0.00599328	3.22946	1.17514	0.000373873	2		KCNN2	0.00581169	4.55731	1.65227	0.000178944	2		ACTN3	0.00798067	1.18059	0.445022	0.00271949	5
	C12orf23	0.00599752	2.74127	0.997582	0.000488495	2		CHRD	0.00582272	-0.690468	0.250387	0.00816475	18		C15orf52	0.00806193	0.655617	0.247453	0.00759459	2
	RAB38	0.00601796	-0.537136	0.19555	0.0125121	7		SRD5A2	0.00584425	0.835281	0.303034	0.00512727	6		INPP5B	0.00807346	1.66465	0.62841	0.00158357	5
	AGMAT	0.00608769	0.623339	0.227246	0.00916576	6		C12orf23	0.00599752	2.74127	0.997582	0.000488495	2		LSM14A	0.00813918	1.32048	0.499002	0.00184613	4
	RNF14	0.00613445	-1.49279	0.544715	0.00157726	7		RAB38	0.00601796	-0.537136	0.19555	0.0125121	7		FAM186B	0.00819103	1.4336	0.54219	0.00166635	3
	CKAP4	0.00624137	-1.07985	0.394852	0.00326075	13		EID3	0.00606135	0.807865	0.294364	0.00542817	7		HCLS1	0.00819612	0.576624	0.218098	0.00994264	14
	CYB561D1	0.00624793	1.29957	0.475253	0.00218629	6		AGMAT	0.00608769	0.623339	0.227246	0.00916576	6		C4orf17	0.00834129	2.27323	0.861746	0.000609229	2
	TGM1	0.00631874	-0.374543	0.137157	0.0256166	38		RNF14	0.00613445	-1.49279	0.544715	0.00157726	7		MTHFR	0.00858405	-0.889924	0.338607	0.00446018	10
	RRP9	0.0063773	0.434479	0.159283	0.0150397	10		CYB561D1	0.00624793	1.29957	0.475253	0.00218629	6		TTC33	0.00864881	1.49225	0.568338	0.00167062	2
	THSD7B	0.0064591	0.339116	0.124514	0.0295383	25		CACNA1G	0.00631306	0.413818	0.151523	0.0216524	20		PARP8	0.00867552	-1.39243	0.530534	0.00169546	9
	SPATA24	0.00664389	-0.598443	0.220487	0.00968538	2		RRP9	0.0063773	0.434479	0.159283	0.0150397	10		ARID2	0.00868373	0.869716	0.331414	0.00464451	13
	BASP1	0.00671568	0.740767	0.273283	0.00630331	3		PCSK9	0.00638072	-0.629017	0.230616	0.0104939	23		SLC6A18	0.00879548	0.367771	0.140376	0.0274624	20
	GALNT2	0.00675567	1.10442	0.407736	0.00299869	10		THSD7B	0.0064591	0.339116	0.124514	0.0295383	25		ATP5C1	0.00889947	-2.54121	0.971449	0.000557069	3
	ZNF645	0.00700946	-0.720099	0.26706	0.0063126	12		FLT1	0.00656888	0.491586	0.180867	0.0125469	21		FARS2	0.00913432	-0.579662	0.222349	0.0097155	7
	MFI2	0.0070218	0.36934	0.137005	0.0287989	34		SPATA24	0.00664389	-0.598443	0.220487	0.00968538	2		DCLK2	0.00935345	0.93524	0.359866	0.00365115	6
	PCDHB9	0.00703948	0.619905	0.230023	0.00895914	5		BASP1	0.00671568	0.740767	0.273283	0.00630331	3		TMEM104	0.00949897	0.841191	0.324339	0.00472784	16
	NAP1L5	0.00705442	3.71695	1.37958	0.000270469	2		GALNT2	0.00675567	1.10442	0.407736	0.00299869	10		AAGAB	0.00952067	-0.738587	0.284864	0.00609379	4
	OS9	0.00707999	0.748334	0.277875	0.00781991	9		ZNF645	0.00700946	-0.720099	0.26706	0.0063126	12		RASAL2	0.00954614	-1.70819	0.659061	0.00112129	7
	ADORA3	0.00708892	-0.729386	0.270882	0.00874087	11		SP7	0.00701279	-1.56331	0.579813	0.000861332	6		FAM3B	0.0096569	-1.51697	0.586185	0.00136114	3
	TEC	0.00711332	-1.37347	0.510299	0.0018296	5		MFI2	0.0070218	0.36934	0.137005	0.0287989	34		KCTD1	0.00966319	-5.1062	1.97329	0.000122545	2
	RPS24	0.00715353	1.17124	0.43547	0.0026294	2		NAP1L5	0.00705442	3.71695	1.37958	0.000270469	2		ZHX1	0.00971558	1.69436	0.655257	0.00105215	4
	SLC5A9	0.0072741	-0.26596	0.09909	0.0364089	25		FRS3	0.00706275	0.459486	0.170567	0.0160394	17		ZNF624	0.00973836	4.1875	1.61993	0.00018694	2
	HSD17B13	0.00743593	0.454092	0.169649	0.0134609	10		OS9	0.00707999	0.748334	0.277875	0.00781991	9		RLN1	0.0097735	-3.07107	1.18861	0.000333912	2
	EYA2	0.00755488	-0.500742	0.18745	0.014006	15		ADORA3	0.00708892	-0.729386	0.270882	0.00874087	11		TGIF1	0.00981148	2.0806	0.805684	0.000733876	3
	EPS15	0.00755766	-0.684427	0.256223	0.00725362	14		TEC	0.00711332	-1.37347	0.510299	0.0018296	5		BEND7	0.00982512	1.31664	0.509945	0.00194623	8
	SLC37A2	0.00755904	0.487451	0.182487	0.0166054	11		RPS24	0.00715353	1.17124	0.43547	0.0026294	2		SV2C	0.00983047	-1.06144	0.411135	0.00287248	11
	SSSCA1	0.00761228	-0.899307	0.33697	0.00444168	5		SLC5A9	0.0072741	-0.26596	0.09909	0.0364089	25		TRIM6	0.00984066	-1.81924	0.704756	0.000913399	4
	SIRT1	0.00765311	0.567406	0.21275	0.0102509	7		HSD17B13	0.00743593	0.454092	0.169649	0.0134609	10		CERS5	0.00984979	0.642908	0.249087	0.00745592	7
	CEACAM6	0.00770285	0.799867	0.300158	0.00544596	5		BOC	0.00748476	0.367269	0.137324	0.0272361	35		LRRN2	0.00997286	1.30784	0.507549	0.00177634	5
	OR10K2	0.00770833	-0.313538	0.117669	0.013708	12		EYA2	0.00755488	-0.500742	0.18745	0.014006	15		SLC4A5	0.00998427	-1.29823	0.503899	0.00205597	7
	THUMPD2	0.00772703	0.910831	0.341933	0.00436531	14		EPS15	0.00755766	-0.684427	0.256223	0.00725362	14		TTI2	0.00999806	-0.797483	0.309595	0.00483942	2
	ABAT	0.00773686	1.62974	0.611916	0.0013946	6		SLC37A2	0.00755904	0.487451	0.182487	0.0166054	11		GRXCR2	0.0100951	-1.44951	0.563451	0.00146631	4
	ABI1	0.00791658	-1.1639	0.438279	0.00245955	4		SSSCA1	0.00761228	-0.899307	0.33697	0.00444168	5		KIAA1161	0.0101157	1.28667	0.500291	0.00227559	5
	SYNJ2BP	0.00792931	1.397	0.526163	0.00174692	5		SIRT1	0.00765311	0.567406	0.21275	0.0102509	7		LMOD1	0.0101515	-1.88424	0.732988	0.00085289	2
	NPPB	0.0079704	0.499747	0.188348	0.0134086	7		CEACAM6	0.00770285	0.799867	0.300158	0.00544596	5		RRP9	0.010192	0.410544	0.159792	0.0149112	9
	IFRD2	0.00806151	-0.259685	0.0980136	0.0338726	20		OR10K2	0.00770833	-0.313538	0.117669	0.013708	12		C1orf123	0.0102064	-0.831725	0.323785	0.00449058	2
	CDH5	0.00807148	0.581654	0.21957	0.0100213	17		THUMPD2	0.00772703	0.910831	0.341933	0.00436531	14		FRS3	0.0102154	0.591805	0.230413	0.00989723	9
	PCDHGB6	0.00809252	0.405437	0.1531	0.0145455	10		SYNJ2BP	0.00792931	1.397	0.526163	0.00174692	5		OGFR	0.0102766	-1.34767	0.525123	0.00178459	4
	CCDC168	0.00809715	0.140336	0.052997	0.148583	64		ACSM1	0.00793547	0.353819	0.133275	0.0255924	22		MUC1	0.0103112	-0.849086	0.331	0.00474049	6
	CUEDC1	0.0080976	1.11637	0.421593	0.00286761	5		NPPB	0.0079704	0.499747	0.188348	0.0134086	7		FGL1	0.0103155	-0.857388	0.334255	0.004697	12
	LSM14A	0.00813918	1.32048	0.499002	0.00184613	4		ZNF598	0.00799789	0.57388	0.216382	0.0135608	11		NXNL2	0.0103203	0.728161	0.283893	0.00631496	3
	SLC9A10	0.00817843	-0.457897	0.173143	0.0168447	22		PCDHGB6	0.00809252	0.405437	0.1531	0.0145455	10		GRIK5	0.0103206	-1.02245	0.398632	0.00295756	5
	IGSF10	0.00820321	0.178719	0.0676046	0.0955522	84		CCDC168	0.00809715	0.140336	0.052997	0.148583	64		THRAP3	0.0103256	2.52146	0.98313	0.000500522	4
	YIPF1	0.00826002	0.845497	0.320112	0.00480853	10		LSM14A	0.00813918	1.32048	0.499002	0.00184613	4		FBP2	0.0104154	-0.357199	0.139437	0.0246319	9
	FAM82A2	0.00832603	1.49414	0.566273	0.0015393	5		SLC9A10	0.00817843	-0.457897	0.173143	0.0168447	22		ARVCF	0.0104781	-0.406095	0.158653	0.0198618	21
	DCLK2	0.00832782	0.919554	0.348516	0.0039257	8		IGSF10	0.00820321	0.178719	0.0676046	0.0955522	84		PIP	0.0105014	-0.620704	0.24257	0.00995957	5
	RNF8	0.00839462	5.44316	2.06511	0.000120645	2		YIPF1	0.00826002	0.845497	0.320112	0.00480853	10		WDR55	0.0105128	0.619053	0.24196	0.00831051	4
	FANCD2	0.00848827	0.39567	0.15033	0.0224289	26		DCLK2	0.00832782	0.919554	0.348516	0.0039257	8		MXRA8	0.0105542	-0.950929	0.371875	0.00348205	3
	ENAM	0.00849126	0.451489	0.171546	0.0147272	22		RNF8	0.00839462	5.44316	2.06511	0.000120645	2		PLK3	0.0105913	0.965348	0.377693	0.0034194	9
	SRRM2	0.00855904	0.251413	0.0956239	0.0567354	75		ADAMTSL1	0.00854418	-0.346504	0.131762	0.0295567	55		LRRC14	0.0106963	-1.65106	0.64685	0.00112928	3
	ZNF425	0.00860937	0.468812	0.178446	0.0152519	18		SRRM2	0.00855904	0.251413	0.0956239	0.0567354	75		PLD1	0.0107235	-0.583092	0.228522	0.00923649	12
	ASPG	0.00862103	-1.07283	0.408427	0.00369398	11		ZNF425	0.00860937	0.468812	0.178446	0.0152519	18		COQ10A	0.0107956	2.5319	0.993195	0.000539896	2
	FBXL12	0.00867317	0.931772	0.355005	0.00382737	9		FBXL12	0.00867317	0.931772	0.355005	0.00382737	9		EXOSC4	0.0108687	1.02526	0.402553	0.00287905	4
	ARHGAP19	0.00870332	0.515284	0.196411	0.0125864	7		ARHGAP19	0.00870332	0.515284	0.196411	0.0125864	7		PUM1	0.010871	2.03438	0.798791	0.000797731	5
	HIP1R	0.00887258	0.54487	0.20821	0.0106704	24		LIF	0.00876978	-0.591172	0.22556	0.0092848	3		THOC7	0.0113809	-4.7302	1.86907	0.000162599	3
	ATP5C1	0.00889947	-2.54121	0.971449	0.000557069	3		HIP1R	0.00887258	0.54487	0.20821	0.0106704	24		PSMB6	0.0113891	-2.91156	1.15057	0.00040954	2
	HAUS2	0.0089641	-0.913681	0.349611	0.00448339	3		ATP5C1	0.00889947	-2.54121	0.971449	0.000557069	3		TEX264	0.011537	-2.9388	1.16342	0.000338892	2
	FBP2	0.00898522	-0.363392	0.139091	0.0247371	10		HAUS2	0.0089641	-0.913681	0.349611	0.00448339	3		BST1	0.0115547	-1.18474	0.469118	0.00207624	5
	NBEAL1	0.00902665	0.263847	0.10105	0.0488722	37		FBP2	0.00898522	-0.363392	0.139091	0.0247371	10		OR8D1	0.0115601	0.777283	0.307799	0.00483066	3
	KRT33A	0.00902665	-1.47613	0.565342	0.00170377	3		NBEAL1	0.00902665	0.263847	0.10105	0.0488722	37		KIF13A	0.0115919	0.356771	0.141333	0.0244749	22
	NOBOX	0.00904758	0.581501	0.222776	0.0104832	10		KRT33A	0.00902665	-1.47613	0.565342	0.00170377	3		ENDOU	0.011679	0.453773	0.179948	0.0164546	15
	LIM2	0.00918019	-1.82928	0.702146	0.00101952	3		NOBOX	0.00904758	0.581501	0.222776	0.0104832	10		SLC26A7	0.0117085	0.859507	0.340964	0.00415249	5
	PRKCB	0.00919613	0.988417	0.379478	0.00324341	6		FARS2	0.00913432	-0.579662	0.222349	0.0097155	7		RYR2	0.0117941	-0.689446	0.27378	0.00706357	21
	SSBP4	0.00926503	-1.39028	0.534287	0.00171344	5		LIM2	0.00918019	-1.82928	0.702146	0.00101952	3		SVEP1	0.0118348	0.387319	0.153879	0.0208757	31
	ACSM1	0.00929068	0.346654	0.133269	0.0256099	23		PRKCB	0.00919613	0.988417	0.379478	0.00324341	6		HORMAD2	0.0118837	-0.721493	0.28681	0.00571813	5
	ZNF138	0.00931408	0.358839	0.137999	0.021591	6		ZNF138	0.00931408	0.358839	0.137999	0.021591	6		CCNI2	0.011931	1.39041	0.553026	0.00158725	2
	FAM101A,ZNF664-FAM101A	0.00944167	-1.19736	0.461298	0.00231424	3		TRMT5	0.00938063	0.496696	0.191194	0.0138175	18		C16orf57	0.0119843	-1.6992	0.676268	0.00106149	5
	RXRB	0.00944799	-2.38134	0.917522	0.000674082	3		FAM101A,ZNF664-FAM101A	0.00944167	-1.19736	0.461298	0.00231424	3		MCTP2	0.0119947	0.735743	0.292856	0.00681926	18
	ODZ1	0.00950091	0.396667	0.152948	0.0215245	25		RXRB	0.00944799	-2.38134	0.917522	0.000674082	3		PPP2R3C	0.012007	-1.24959	0.497461	0.00188261	7
	SNCG	0.00950729	1.07834	0.415827	0.00285121	6		ODZ1	0.00950091	0.396667	0.152948	0.0215245	25		CEACAM6	0.0120698	0.978438	0.389801	0.00308291	3
	JMJD5	0.00963233	0.555793	0.214695	0.0102333	12		SNCG	0.00950729	1.07834	0.415827	0.00285121	6		HEXB	0.0120755	-1.24114	0.494492	0.00194268	5
	AHSP	0.00963286	7.35724	2.84202	5.96545e-05	2		JMJD5	0.00963233	0.555793	0.214695	0.0102333	12		BOC	0.0120857	0.415265	0.165468	0.0196821	19
	MEP1B	0.00965956	0.77468	0.29936	0.00545159	18		AHSP	0.00963286	7.35724	2.84202	5.96545e-05	2		DNAH3	0.0121871	-0.18923	0.0754904	0.082522	77
	FLT1	0.00966786	0.465392	0.179863	0.0127163	22		MEP1B	0.00965956	0.77468	0.29936	0.00545159	18		ZMYND8	0.0122304	-2.54645	1.01637	0.000447365	4
	HS3ST4	0.00967002	-0.586176	0.226549	0.0102466	3		HS3ST4	0.00967002	-0.586176	0.226549	0.0102466	3		USP21	0.0122529	3.56138	1.42184	0.000222027	3
	CERS4	0.00967417	-1.10596	0.427463	0.0026172	10		PSMB9	0.0097886	0.763902	0.295718	0.00661841	4		ALDH7A1	0.0123191	0.632971	0.252898	0.00738991	11
	PSMB9	0.0097886	0.763902	0.295718	0.00661841	4		FANCD2	0.00991065	0.406205	0.157509	0.0199693	25		REV3L	0.0123365	0.450055	0.179852	0.0156521	20
	INTS3	0.00990151	-0.947456	0.367338	0.00277212	5		CFHR4	0.00992791	-0.688672	0.2671	0.00797908	9		SLIT2	0.0124013	-0.514494	0.205755	0.0113398	19
	CFHR4	0.00992791	-0.688672	0.2671	0.00797908	9		ZBTB7B	0.00993369	2.22242	0.862026	0.000665985	5		DAGLB	0.012501	-0.670475	0.268439	0.00667007	7
	ZBTB7B	0.00993369	2.22242	0.862026	0.000665985	5		CUL4A	0.00998996	0.540114	0.209657	0.0109124	9		HDAC11	0.0125553	-2.40045	0.961665	0.000502399	3
	CUL4A	0.00998996	0.540114	0.209657	0.0109124	9		AMZ1	0.0100938	0.422261	0.164138	0.0184618	26		GPATCH4	0.0126498	-0.851619	0.341538	0.00459598	3
	AMZ1	0.0100938	0.422261	0.164138	0.0184618	26		C1orf123	0.0102064	-0.831725	0.323785	0.00449058	2		ERCC8	0.0126543	0.753632	0.302257	0.00532138	8
	BOC	0.01014	0.352246	0.137006	0.0274231	36		NXNL2	0.0103203	0.728161	0.283893	0.00631496	3		CNTN1	0.0126678	1.52474	0.611617	0.00131114	8
	C1orf123	0.0102064	-0.831725	0.323785	0.00449058	2		FAM175B	0.010369	1.30932	0.5108	0.00179958	5		VPS53	0.0127548	-0.635072	0.254994	0.00739194	6
	CACNA1G	0.0102858	0.360121	0.140339	0.0261399	21		ZNF324B	0.0103701	-1.84528	0.719901	0.000957512	6		CEP85	0.0128296	0.802514	0.322494	0.0048623	6
	NXNL2	0.0103203	0.728161	0.283893	0.00631496	3		TBX5	0.0104622	-0.40577	0.158494	0.0191979	13		OR7G3	0.0128378	0.256019	0.102892	0.0262372	5
	ZNF324B	0.0103701	-1.84528	0.719901	0.000957512	6		NRD1	0.0105184	-0.505768	0.197696	0.0130042	16		C9orf156	0.0128775	-1.61141	0.647897	0.00111819	4
	TBX5	0.0104622	-0.40577	0.158494	0.0191979	13		MXRA8	0.0105542	-0.950929	0.371875	0.00348205	3		LCTL	0.012891	-0.424699	0.170783	0.0169808	19
	ADAMTSL1	0.0104726	-0.335549	0.131083	0.02978	56		CELA2A	0.0105993	-0.618071	0.241846	0.00790843	9		TRAF1	0.0129023	1.66142	0.66819	0.00114678	2
	PTH2R	0.0104846	0.56534	0.220886	0.0104427	18		CCL11	0.0106131	0.815893	0.319309	0.00496118	4		SRRM1	0.0129763	-0.944428	0.38014	0.0038201	4
	MXRA8	0.0105542	-0.950929	0.371875	0.00348205	3		PSMB11	0.0106659	0.491119	0.192335	0.0127697	19		XKR6	0.0130388	2.85039	1.1481	0.000340712	5
	CELA2A	0.0105993	-0.618071	0.241846	0.00790843	9		BSG	0.0108875	1.30078	0.510855	0.00213679	10		INSC	0.0132278	-0.370669	0.14961	0.022205	20
	CCL11	0.0106131	0.815893	0.319309	0.00496118	4		IFI27L1	0.0108955	1.18764	0.466467	0.00227196	5		ZNF14	0.0132449	1.98105	0.799743	0.000748345	8
	PSMB11	0.0106659	0.491119	0.192335	0.0127697	19		DGCR14	0.0109057	-0.632863	0.2486	0.00924864	8		ZNF598	0.0132491	1.01815	0.411043	0.0026326	6
	FETUB	0.0107727	0.482027	0.189031	0.0139071	9		OR7G3	0.0109474	0.18023	0.0708346	0.0417956	10		EIF2AK1	0.0132557	-0.761925	0.307622	0.00556517	8
	EPC1	0.0107913	-0.510523	0.200254	0.0143661	12		CUEDC1	0.0111548	1.67369	0.659503	0.00117938	4		OMA1	0.0132875	-0.773463	0.312388	0.00452985	4
	IFI27L1	0.0108955	1.18764	0.466467	0.00227196	5		RALGPS1	0.0112516	-0.507007	0.200019	0.0117244	5		IKZF3	0.0133011	-3.61405	1.45986	0.000268647	2
	DGCR14	0.0109057	-0.632863	0.2486	0.00924864	8		TKT	0.0112746	-0.368498	0.145417	0.0173656	16		CCDC70	0.0133921	1.3334	0.539145	0.00168728	5
	OR7G3	0.0109474	0.18023	0.0708346	0.0417956	10		GTSF1L	0.0112954	0.752915	0.297192	0.00643448	9		MCF2L2	0.0135985	0.451507	0.182967	0.0149975	12
	RALGPS1	0.0112516	-0.507007	0.200019	0.0117244	5		PHYHIPL	0.0113437	2.02008	0.797843	0.000829317	3		POGK	0.0136629	-0.973322	0.394695	0.00295349	3
	TKT	0.0112746	-0.368498	0.145417	0.0173656	16		THOC7	0.0113809	-4.7302	1.86907	0.000162599	3		ITLN1	0.0137475	-0.588819	0.238989	0.00857232	8
	GTSF1L	0.0112954	0.752915	0.297192	0.00643448	9		TEX264	0.011537	-2.9388	1.16342	0.000338892	2		DSN1	0.013861	3.01047	1.22335	0.000297924	2
	PHYHIPL	0.0113437	2.02008	0.797843	0.000829317	3		OR14A16	0.0116784	-0.473671	0.187837	0.0178323	9		TROVE2	0.0141256	-0.796278	0.324475	0.00439968	4
	THOC7	0.0113809	-4.7302	1.86907	0.000162599	3		OR5K1	0.0117235	-0.853309	0.338567	0.00503519	5		GORASP1	0.0142229	-0.331873	0.135371	0.0262541	11
	CHD6	0.011514	0.345409	0.136704	0.0280099	37		SLC52A1	0.0117346	-1.1926	0.47325	0.00221809	7		DDX51	0.0142259	0.447512	0.182546	0.0149418	7
	TEX264	0.011537	-2.9388	1.16342	0.000338892	2		FAM190B	0.0117641	-0.395667	0.157064	0.0223801	15		ESM1	0.0143201	1.31753	0.53796	0.00229683	3
	MRVI1	0.0115575	-0.290004	0.114836	0.0347319	27		CTSL2	0.0117764	1.64433	0.652829	0.00113646	4		EMILIN3	0.0143771	-0.817028	0.333794	0.00452399	7
	OR14A16	0.0116784	-0.473671	0.187837	0.0178323	9		ZKSCAN3	0.0119644	2.28843	0.910565	0.000574408	3		NUP93	0.0144202	-0.892215	0.364672	0.00421703	10
	OR5K1	0.0117235	-0.853309	0.338567	0.00503519	5		MUTED	0.01205	-1.00792	0.401455	0.0030555	5		FKRP	0.014493	1.20475	0.49278	0.00201739	3
	SLC52A1	0.0117346	-1.1926	0.47325	0.00221809	7		GUK1	0.0121458	-4.40098	1.75486	0.000152044	2		CFHR4	0.0145233	-2.29717	0.939904	0.000564071	2
	FAM190B	0.0117641	-0.395667	0.157064	0.0223801	15		C5orf4	0.012333	0.773851	0.309235	0.00537763	11		MED19	0.0145635	-2.48011	1.01517	0.000464815	4
	CTSL2	0.0117764	1.64433	0.652829	0.00113646	4		PPARGC1B	0.0123927	0.264167	0.105635	0.0343009	35		CEP85L	0.0145698	-0.717193	0.293583	0.00584169	6
	ZKSCAN3	0.0119644	2.28843	0.910565	0.000574408	3		TRIM41	0.0124792	0.575068	0.230184	0.0118789	10		SLC16A4	0.0147782	1.84445	0.756614	0.000859046	5
	MUTED	0.01205	-1.00792	0.401455	0.0030555	5		C15orf52	0.012492	0.494396	0.197922	0.0124205	13		YIPF1	0.0148092	0.872061	0.35784	0.00380689	7
	SP7	0.0121529	-1.43921	0.573922	0.00089054	7		MDH1B	0.0125339	0.927551	0.371504	0.00382898	15		OR10K2	0.0148183	-0.613612	0.251811	0.00429241	4
	PTPRG	0.0122621	-0.380395	0.151884	0.0221951	33		HDAC11	0.0125553	-2.40045	0.961665	0.000502399	3		ALDH18A1	0.014859	-1.71982	0.706062	0.000929306	11
	C5orf4	0.012333	0.773851	0.309235	0.00537763	11		AZU1	0.0125956	0.804074	0.322274	0.00456995	9		FITM1	0.0149144	-0.907744	0.372874	0.00347667	6
	SMPD4	0.0123585	1.98574	0.793745	0.000753671	2		ZMYND12	0.0126319	-0.66762	0.267693	0.00664753	8		ARMC10	0.0149509	0.698497	0.287026	0.00587546	3
	TRIM41	0.0124792	0.575068	0.230184	0.0118789	10		SLC41A1	0.0126832	-1.99816	0.801655	0.000803491	4		PTPN9	0.0150316	2.36868	0.974117	0.000498618	2
	C15orf52	0.012492	0.494396	0.197922	0.0124205	13		FAM151A	0.0127216	0.498819	0.200211	0.0137646	19		TEX2	0.0150626	-0.689657	0.283708	0.00600443	11
	NRD1	0.0125172	-0.460868	0.184552	0.0148037	17		ELMOD2	0.012729	1.25638	0.504316	0.00219419	5		TJP1	0.0150899	-0.58677	0.241448	0.00819082	15
	MDH1B	0.0125339	0.927551	0.371504	0.00382898	15		MYBPHL	0.0127866	-0.473314	0.190112	0.0133177	16		UIMC1	0.0151234	-0.793164	0.326484	0.00438718	4
	HDAC11	0.0125553	-2.40045	0.961665	0.000502399	3		PARS2	0.012881	1.20075	0.482804	0.00212431	9		FAM178A	0.0152711	1.26396	0.52103	0.00172335	3
	AZU1	0.0125956	0.804074	0.322274	0.00456995	9		TAB3	0.0129101	-1.37207	0.551867	0.00127095	3		INO80D	0.0153802	-0.688986	0.284317	0.00592898	6
	ZMYND12	0.0126319	-0.66762	0.267693	0.00664753	8		LAMA1	0.0129762	0.184113	0.0741072	0.0768044	82		ZNF800	0.0154575	0.883309	0.364781	0.0034321	5
	SLC41A1	0.0126832	-1.99816	0.801655	0.000803491	4		POLI	0.0132731	0.569042	0.22979	0.00952549	19		SLC39A12	0.0154989	0.651203	0.269036	0.00686328	7
	FAM151A	0.0127216	0.498819	0.200211	0.0137646	19		GPM6B	0.0133106	0.864641	0.349301	0.0035422	3		HK2	0.015649	1.61155	0.666758	0.00106343	4
	ELMOD2	0.012729	1.25638	0.504316	0.00219419	5		NKIRAS1	0.0133746	-2.70551	1.09374	0.000434182	3		OR8A1	0.0156782	0.755312	0.312587	0.00501481	8
	MYBPHL	0.0127866	-0.473314	0.190112	0.0133177	16		SRSF4	0.0134053	1.03095	0.416914	0.00268922	3		DSCR4	0.015793	1.33653	0.553733	0.00177492	3
	LILRB1	0.0128257	1.45932	0.58641	0.00139182	10		TBC1D8	0.0134158	-0.404366	0.163543	0.0201763	24		BBS12	0.0158461	-0.470858	0.195179	0.0126578	6
	TAB3	0.0129101	-1.37207	0.551867	0.00127095	3		BAIAP2	0.0134634	-1.75134	0.708681	0.000992053	8		DNAJC21	0.0159133	-0.532972	0.221068	0.0098778	12
	LAMA1	0.0129762	0.184113	0.0741072	0.0768044	82		OR12D2	0.0134643	-0.367964	0.148898	0.0197838	11		TTC17	0.0159388	-0.94158	0.390646	0.00318339	14
	POLI	0.0132731	0.569042	0.22979	0.00952549	19		LOC653486,SCGB1C1	0.0134652	-3.23541	1.30923	0.000274557	3		RNF217	0.0161087	0.872879	0.362726	0.00356942	2
	GPM6B	0.0133106	0.864641	0.349301	0.0035422	3		LMLN	0.0135345	0.772891	0.312989	0.00762999	2		USP40	0.016113	0.530954	0.220647	0.0118659	10
	NKIRAS1	0.0133746	-2.70551	1.09374	0.000434182	3		SSTR1	0.013616	1.34694	0.545931	0.00180799	4		SNCG	0.016138	1.49114	0.619817	0.00124087	2
	SRSF4	0.0134053	1.03095	0.416914	0.00268922	3		IL6ST	0.0137182	-0.573422	0.232667	0.0092621	11		ARHGAP11A	0.0162405	-0.865452	0.360085	0.0039491	9
	BAIAP2	0.0134634	-1.75134	0.708681	0.000992053	8		PHF19	0.0137653	-0.765632	0.310812	0.00538594	9		SLFN5	0.0163014	1.27468	0.530654	0.00169663	4
	OR12D2	0.0134643	-0.367964	0.148898	0.0197838	11		SLC16A9	0.0137656	-0.822457	0.333881	0.00420077	2		ZNF835	0.0163325	3.18507	1.32634	0.000381395	3
	LOC653486,SCGB1C1	0.0134652	-3.23541	1.30923	0.000274557	3		CAMKK2	0.01378	1.5958	0.647923	0.00129848	7		CCDC136	0.0163951	0.717985	0.299161	0.00562185	6
	MDGA2	0.0135279	0.465693	0.188573	0.0148796	16		ENDOU	0.0138048	0.428515	0.17403	0.0175295	21		EFCAB5	0.0163981	0.38228	0.159288	0.0198044	15
	LMLN	0.0135345	0.772891	0.312989	0.00762999	2		SLC44A5	0.0138605	-0.616943	0.250702	0.00945825	6		SLC44A5	0.0164336	-0.752152	0.313509	0.00471449	3
	SSTR1	0.013616	1.34694	0.545931	0.00180799	4		COQ10A	0.013885	2.24311	0.911751	0.000628555	5		OR51B2	0.0164618	-3.0157	1.25732	0.000296849	4
	TFRC	0.0136261	0.802956	0.325482	0.00474727	11		TMEM63B	0.0138933	1.79425	0.729368	0.00107655	6		MPI	0.0164776	-1.79465	0.748344	0.000730527	5
	IL6ST	0.0137182	-0.573422	0.232667	0.0092621	11		CDR2	0.0139126	2.17811	0.885585	0.000721056	5		C1orf187	0.0165245	-1.59657	0.666037	0.00111107	4
	SLC16A9	0.0137656	-0.822457	0.333881	0.00420077	2		C11orf53	0.0139704	-1.9903	0.809716	0.000743893	3		CD44	0.0165582	-0.998808	0.4168	0.00268233	6
	CAMKK2	0.01378	1.5958	0.647923	0.00129848	7		C5	0.0139779	-0.436994	0.177797	0.0158286	23		SYT5	0.0165915	-1.08227	0.451767	0.0024704	7
	ENDOU	0.0138048	0.428515	0.17403	0.0175295	21		HINT3	0.0139979	-0.940139	0.382587	0.00320611	6		POLR1A	0.0166526	-0.893104	0.373014	0.00353205	9
	FGD4	0.0138215	-0.499982	0.203091	0.0116221	12		SLC11A1	0.0140548	-0.386299	0.157297	0.019221	24		CDK5RAP3	0.0167013	1.42917	0.597177	0.00142428	5
	SLC44A5	0.0138605	-0.616943	0.250702	0.00945825	6		ZNF469	0.0140557	0.176662	0.0719355	0.0828405	36		SORCS3	0.0167325	-1.47447	0.616281	0.00127523	6
	COQ10A	0.013885	2.24311	0.911751	0.000628555	5		CCL19	0.0140629	-2.68888	1.09498	0.000397302	2		PHF19	0.0167363	-0.885219	0.370005	0.00368689	4
	TMEM63B	0.0138933	1.79425	0.729368	0.00107655	6		ZCCHC8	0.0140965	0.567366	0.231126	0.00901962	9		BBS2	0.0167524	-1.4869	0.621588	0.00118048	6
	CDR2	0.0139126	2.17811	0.885585	0.000721056	5		C16orf57	0.0141156	-1.57589	0.642091	0.00116664	6		RABL5	0.0169606	-2.64881	1.10942	0.000379713	3
	C11orf53	0.0139704	-1.9903	0.809716	0.000743893	3		MRVI1	0.014163	-0.282565	0.115187	0.0346501	26		SST	0.0170156	-1.15142	0.482497	0.00202733	2
	HINT3	0.0139979	-0.940139	0.382587	0.00320611	6		NTN5	0.0141852	-0.549082	0.223883	0.0097181	9		LMNB2	0.017052	1.70233	0.71359	0.00092074	4
	LCK	0.0140054	1.75001	0.712221	0.00120151	3		CCL23	0.0142272	-2.38546	0.97307	0.000473233	3		ALPPL2	0.0171353	1.23411	0.517708	0.0018023	5
	CCL19	0.0140629	-2.68888	1.09498	0.000397302	2		DHX57	0.0143508	-0.298171	0.121784	0.0287931	28		CAMKK2	0.0171582	2.03071	0.852056	0.000654285	5
	C16orf57	0.0141156	-1.57589	0.642091	0.00116664	6		FAM171B	0.0144324	0.492046	0.201138	0.012225	8		OR5W2	0.0171605	1.10596	0.464055	0.00244465	5
	NTN5	0.0141852	-0.549082	0.223883	0.0097181	9		LRRIQ1	0.0146372	0.288812	0.118306	0.0379948	47		HYLS1	0.0171951	-1.01906	0.427724	0.00264049	5
	CCL23	0.0142272	-2.38546	0.97307	0.000473233	3		IL13	0.0146537	1.55588	0.637439	0.00118169	5		SYTL5	0.0173154	-1.91874	0.806215	0.000708552	6
	LRRIQ1	0.0142358	0.257971	0.10524	0.0445466	48		CLDN22	0.0147134	-3.39668	1.39245	0.000240541	2		PTPRS	0.0173765	-0.766853	0.322391	0.00473077	15
	SLC11A1	0.0143114	-0.385078	0.157216	0.0192591	25		FKRP	0.0147594	1.186	0.48642	0.00207582	4		CEP104	0.0174066	0.491859	0.206837	0.0111338	17
	DHX57	0.0143508	-0.298171	0.121784	0.0287931	28		CHCHD2	0.0147818	1.09414	0.448845	0.00239644	3		PPCDC	0.0174344	1.72153	0.72412	0.00096886	4
	FAM171B	0.0144324	0.492046	0.201138	0.012225	8		PCDHB9	0.0148116	0.729662	0.299415	0.00531218	3		C1orf51	0.0174565	0.849296	0.357305	0.00355765	4
	PPME1	0.0144946	-0.71566	0.292731	0.00544319	7		NPAS1	0.0148144	1.09029	0.447411	0.00284099	3		SEMG2	0.0175256	-0.732933	0.308539	0.0041518	8
	CLDN22	0.0147134	-3.39668	1.39245	0.000240541	2		PKLR	0.0148196	-0.431949	0.177264	0.0154193	14		PPP2R5C	0.0175823	-2.11794	0.892029	0.000590221	3
	FKRP	0.0147594	1.186	0.48642	0.00207582	4		ALDH18A1	0.014859	-1.71982	0.706062	0.000929306	11		AGBL5	0.0176053	0.738028	0.310903	0.00495856	11
	CHCHD2	0.0147818	1.09414	0.448845	0.00239644	3		KIAA0196	0.0148976	0.570847	0.234448	0.00867167	14		EPYC	0.0176072	0.697243	0.293727	0.00563678	6
	ALDH18A1	0.014859	-1.71982	0.706062	0.000929306	11		SLC38A2	0.0149084	0.494239	0.203007	0.0114662	10		ZMYM2	0.0178052	1.58593	0.669267	0.00116827	5
	KIAA0196	0.0148976	0.570847	0.234448	0.00867167	14		EEPD1	0.0150702	-0.548761	0.225764	0.0107524	13		SMAD6	0.0178545	0.625467	0.264063	0.00678926	3
	SLC38A2	0.0149084	0.494239	0.203007	0.0114662	10		FICD	0.0151458	-0.411431	0.169392	0.0179063	10		SEMA6C	0.0179083	0.616428	0.26037	0.00859872	8
	EEPD1	0.0150702	-0.548761	0.225764	0.0107524	13		FBXO16	0.0152182	0.71486	0.294527	0.00577333	6		LRRC32	0.0180361	1.8708	0.791076	0.000789476	2
	MIB2	0.0150869	-0.342604	0.140973	0.0243179	17		NOP16	0.0152359	-0.702838	0.289624	0.00670954	3		RSAD2	0.0180368	1.85707	0.785277	0.000759928	8
	FICD	0.0151458	-0.411431	0.169392	0.0179063	10		PTPN21	0.0152484	-0.512913	0.211386	0.011681	22		GAS2L2	0.0181202	-0.895019	0.378739	0.00323374	12
	FBXO16	0.0152182	0.71486	0.294527	0.00577333	6		ARHGAP6	0.0153616	0.816074	0.3367	0.00406129	12		TNXB	0.0181581	-0.565604	0.239421	0.0102949	21
	NOP16	0.0152359	-0.702838	0.289624	0.00670954	3		IFRD2	0.0154452	-0.341591	0.14105	0.0248503	16		TRIM8	0.0181929	2.13737	0.905027	0.000791508	2
	ARHGAP6	0.0153616	0.816074	0.3367	0.00406129	12		UTS2R	0.0155285	-0.874512	0.361396	0.0044585	3		FAM176B	0.0183011	1.09685	0.46487	0.00216443	2
	CSNK2A2	0.0154532	1.95088	0.805623	0.000747742	2		DSCR4	0.0155585	1.05546	0.436299	0.00279603	4		EEPD1	0.0183922	-0.750096	0.318157	0.00583061	5
	DNAH7	0.0155257	-0.113739	0.0470021	0.140049	116		LOXL4	0.0155654	0.422196	0.174537	0.0126808	31		EIF1AD	0.0185376	1.63594	0.694754	0.00102237	2
	UTS2R	0.0155285	-0.874512	0.361396	0.0044585	3		FGD4	0.0157007	-0.511313	0.211654	0.0104662	11		PHF20	0.0186854	-1.04308	0.443534	0.00235832	3
	DSCR4	0.0155585	1.05546	0.436299	0.00279603	4		SVOPL	0.0157193	0.461967	0.191262	0.0133178	26		EPB42	0.0187083	0.685367	0.291485	0.00555078	6
	LOXL4	0.0155654	0.422196	0.174537	0.0126808	31		TSPYL1	0.0157691	-0.714737	0.296053	0.00529241	7		AGMAT	0.0188508	0.584552	0.248908	0.00757551	5
	SVOPL	0.0157193	0.461967	0.191262	0.0133178	26		WNT10A	0.015871	-0.693291	0.287449	0.00622139	13		CEP89	0.0188659	-0.717719	0.305651	0.00499589	8
	TSPYL1	0.0157691	-0.714737	0.296053	0.00529241	7		OR8A1	0.0159069	0.50204	0.208225	0.0105682	11		GNAI3	0.0191165	-1.56302	0.667032	0.00105966	5
	WNT10A	0.015871	-0.693291	0.287449	0.00622139	13		CLEC3A	0.0160103	-0.869344	0.360921	0.0038051	8		ENOPH1	0.0191802	-3.28004	1.40052	0.000242544	3
	OR8A1	0.0159069	0.50204	0.208225	0.0105682	11		IKBKB	0.0160628	-0.816502	0.339151	0.00421353	12		ARRDC2	0.0192539	0.567608	0.242507	0.00819827	7
	CLEC3A	0.0160103	-0.869344	0.360921	0.0038051	8		COG3	0.0160639	0.532248	0.221083	0.0107372	12		MIOS	0.0193188	1.26679	0.54152	0.00165874	7
	PPARGC1B	0.0160571	0.252875	0.105031	0.0345146	38		CDCP2	0.0160821	0.582729	0.242093	0.00812394	15		TRIB1	0.0193666	2.63282	1.12591	0.000424994	2
	IKBKB	0.0160628	-0.816502	0.339151	0.00421353	12		AGPHD1	0.0161691	0.59983	0.249402	0.00886122	9		TUB	0.0193987	0.498153	0.213088	0.0103913	7
	COG3	0.0160639	0.532248	0.221083	0.0107372	12		MIB2	0.0163637	-0.364626	0.151883	0.0203648	16		FAP	0.0195107	0.792915	0.339487	0.00408593	9
	CDCP2	0.0160821	0.582729	0.242093	0.00812394	15		DAAM1	0.0163929	0.658782	0.274487	0.00651093	9		SPAST	0.0196024	-0.514499	0.220449	0.00978625	3
	IL25	0.0161495	0.56844	0.236306	0.00892017	6		CCDC57	0.0165221	-0.418584	0.174616	0.0186105	21		TRIM58	0.0196813	0.594414	0.254854	0.00872977	4
	AGPHD1	0.0161691	0.59983	0.249402	0.00886122	9		GTF3A	0.0166239	0.714572	0.29837	0.00563415	6		HIRIP3	0.0201958	-0.597963	0.257444	0.00797986	5
	MSH5-SAPCD1	0.0162206	0.550098	0.228834	0.0115711	2		MYCT1	0.01664	0.635493	0.26539	0.00667504	10		STS	0.0202782	-0.849305	0.365897	0.00358198	5
	FRS3	0.0163496	0.403102	0.167888	0.0165446	18		PPP2R3C	0.0167146	-1.15595	0.483071	0.00213329	8		ZNF296	0.0202898	3.54164	1.52595	0.000201256	3
	DAAM1	0.0163929	0.658782	0.274487	0.00651093	9		GPR61	0.0167463	2.39524	1.00126	0.000484883	3		GPR78	0.0204056	1.65035	0.711725	0.00110645	3
	DUSP27	0.0164902	0.295019	0.123033	0.0326492	38		GTF3C1	0.0168496	0.52792	0.22089	0.010289	31		PTPN21	0.0204256	-0.980841	0.423061	0.00262657	13
	KCNQ3	0.0165822	0.614297	0.256401	0.00726067	11		LCK	0.0169239	1.8839	0.788786	0.00104069	2		ZNF669	0.0205102	-1.64564	0.71028	0.000900298	2
	GTF3A	0.0166239	0.714572	0.29837	0.00563415	6		C14orf183	0.0169374	0.743299	0.311256	0.00501887	8		SPTY2D1	0.0207062	0.922437	0.398754	0.00296536	4
	MYCT1	0.01664	0.635493	0.26539	0.00667504	10		AHRR	0.0169475	-0.43031	0.180208	0.0152947	12		SPATA5	0.0207328	-0.52375	0.226456	0.00943565	9
	PPP2R3C	0.0167146	-1.15595	0.483071	0.00213329	8		C6orf226	0.0169535	0.930825	0.389839	0.00314416	4		PTPRH	0.0207335	-0.426068	0.184221	0.0131482	12
	GPR61	0.0167463	2.39524	1.00126	0.000484883	3		RABL5	0.0169606	-2.64881	1.10942	0.000379713	3		BSDC1	0.0207537	-1.2689	0.54873	0.00167132	4
	PHF19	0.0167527	-0.739575	0.309175	0.00547711	10		A2LD1	0.0169689	-1.36941	0.573603	0.00239104	2		HIPK4	0.0207838	-0.66667	0.288366	0.0062104	8
	GTF3C1	0.0167788	0.524227	0.219202	0.0104409	32		SST	0.0170156	-1.15142	0.482497	0.00202733	2		DNAJC2	0.020861	3.0802	1.33314	0.000362052	2
	SULF2	0.0168381	0.56317	0.235614	0.00908927	24		POTEA	0.0170322	0.465281	0.195003	0.0155337	8		ACAD8	0.0209271	1.86531	0.80774	0.000700995	3
	ZCCHC8	0.0168666	0.3839	0.160654	0.0184887	12		ALPPL2	0.0171353	1.23411	0.517708	0.0018023	5		SLAMF1	0.0209306	1.00693	0.436045	0.00298701	2
	C14orf183	0.0169374	0.743299	0.311256	0.00501887	8		IL25	0.0171584	0.564335	0.236787	0.00883644	5		EME2	0.0209736	-1.05644	0.45764	0.00245442	7
	AHRR	0.0169475	-0.43031	0.180208	0.0152947	12		LCTL	0.0171848	-0.356513	0.149624	0.0222475	26		ZNF284	0.0210232	-0.777115	0.336768	0.00411451	3
	C6orf226	0.0169535	0.930825	0.389839	0.00314416	4		DOCK3	0.0172873	-0.531298	0.223184	0.00986406	18		NTN5	0.0210661	-0.673344	0.291896	0.00555318	6
	RABL5	0.0169606	-2.64881	1.10942	0.000379713	3		LPCAT2	0.0172967	-0.417892	0.17556	0.015848	11		PAG1	0.0213892	4.58018	1.99048	0.000116832	3
	A2LD1	0.0169689	-1.36941	0.573603	0.00239104	2		CCDC93	0.0173757	-0.689513	0.289875	0.00656071	12		KDM2B	0.021481	2.16343	0.940857	0.000549448	5
	SST	0.0170156	-1.15142	0.482497	0.00202733	2		FGR	0.017388	-1.7197	0.723048	0.00110028	4		FLT1	0.0216907	0.58097	0.253064	0.00738616	11
	POTEA	0.0170322	0.465281	0.195003	0.0155337	8		CD33	0.0174284	0.393007	0.1653	0.0220401	13		ANKRD13A	0.0217462	1.52861	0.666129	0.00112064	3
	ALPPL2	0.0171353	1.23411	0.517708	0.0018023	5		DUSP27	0.0175075	0.292513	0.123118	0.0325966	37		HSF2BP	0.0219282	1.00185	0.437183	0.00243018	5
	LPCAT2	0.0172967	-0.417892	0.17556	0.015848	11		PHTF2	0.017531	-0.564195	0.237518	0.00843917	9		PGM3	0.0219403	1.20949	0.527838	0.00171286	6
	CCDC93	0.0173757	-0.689513	0.289875	0.00656071	12		MFSD4	0.0175477	-1.18743	0.499965	0.00193403	3		MYLK2	0.0219448	-1.46998	0.641544	0.00122536	5
	CNTNAP4	0.0174228	-0.352213	0.148134	0.0224379	41		KRTAP13-2	0.0177646	0.63703	0.268734	0.00684388	7		MRPS24	0.0220877	-0.873253	0.381524	0.00325795	3
	CD33	0.0174284	0.393007	0.1653	0.0220401	13		SYT5	0.0177818	-1.04712	0.441798	0.00259307	8		IRX2	0.0222478	-1.40626	0.615132	0.00125966	5
	PHTF2	0.017531	-0.564195	0.237518	0.00843917	9		PCDHGA4	0.0177949	0.403422	0.17023	0.0169023	11		RAB3D	0.02227	-0.836123	0.365801	0.00352521	4
	MFSD4	0.0175477	-1.18743	0.499965	0.00193403	3		ATG12	0.0178749	-3.58337	1.51312	0.000206392	2		SS18	0.0223075	-0.599144	0.262197	0.00816725	5
	HTR4	0.0176126	0.385777	0.162524	0.0214292	15		SSBP4	0.0179028	-1.37417	0.580399	0.00144457	4		WNT10A	0.0224196	-0.701156	0.307096	0.0055202	11
	ZYG11B	0.0177467	-2.32232	0.979527	0.000502378	3		KLRG1	0.017948	0.951778	0.402156	0.00299055	4		TG	0.0224739	0.311857	0.136644	0.0265007	47
	KRTAP13-2	0.0177646	0.63703	0.268734	0.00684388	7		FSTL5	0.0180984	0.380534	0.160998	0.0216766	18		UQCRB	0.0225114	-2.82519	1.23824	0.000327131	2
	SYT5	0.0177818	-1.04712	0.441798	0.00259307	8		VGLL2	0.0181204	2.85527	1.20825	0.000343657	3		TBX18	0.0225327	0.953416	0.417933	0.00284231	7
	ATG12	0.0178749	-3.58337	1.51312	0.000206392	2		ABAT	0.0181236	1.51259	0.640093	0.0012953	5		ADCK3	0.022538	0.853215	0.374024	0.00350933	15
	KLRG1	0.017948	0.951778	0.402156	0.00299055	4		CIB3	0.0181261	2.27818	0.964094	0.00050104	4		TSPAN15	0.0225584	0.707022	0.309984	0.00506582	7
	ABCA7	0.0179592	0.216699	0.091571	0.0587998	70		ADAM32	0.0181298	-0.471978	0.199741	0.0123662	19		PRNP	0.0226066	-1.28058	0.561652	0.00153149	3
	TBC1D8	0.0179963	-0.385452	0.162934	0.0203983	25		ALDH7A1	0.018179	0.587909	0.248908	0.00761774	12		SEC14L2	0.0226087	-2.36994	1.03945	0.000397471	3
	VGLL2	0.0181204	2.85527	1.20825	0.000343657	3		DNAH6	0.0182315	-0.2256	0.0955575	0.0471713	36		SERPINE2	0.0226254	0.50978	0.223617	0.0116152	4
	CIB3	0.0181261	2.27818	0.964094	0.00050104	4		FAM176B	0.0183011	1.09685	0.46487	0.00216443	2		SATB1	0.0227366	-1.30064	0.571	0.00142551	2
	ADAM32	0.0181298	-0.471978	0.199741	0.0123662	19		IDO1	0.0183273	-0.493314	0.209125	0.00810775	10		GJB4	0.0227587	0.471391	0.206981	0.0112426	15
	ALDH7A1	0.018179	0.587909	0.248908	0.00761774	12		CHD1	0.0183421	-0.498747	0.211455	0.0108835	16		C9orf128	0.0227862	-4.4655	1.96113	0.000116877	2
	DNAH6	0.0182315	-0.2256	0.0955575	0.0471713	36		VPS53	0.018374	-0.599247	0.254134	0.00743868	7		TREH	0.0228189	1.13928	0.500464	0.00194984	7
	DOCK3	0.0182477	-0.52528	0.222524	0.00998814	20		MCCC2	0.0185185	-0.583519	0.24777	0.00796268	14		MED26	0.0228316	-1.5302	0.672251	0.00110026	5
	FAM176B	0.0183011	1.09685	0.46487	0.00216443	2		C17orf102	0.0186034	-0.947664	0.402681	0.00295849	4		POU2F3	0.0228634	-1.04879	0.460865	0.00257187	5
	IDO1	0.0183273	-0.493314	0.209125	0.00810775	10		CNGA2	0.0186116	-0.344157	0.14625	0.0239659	15		STAG3	0.0229412	-0.80749	0.355032	0.0036906	12
	CHD1	0.0183421	-0.498747	0.211455	0.0108835	16		RAB40C	0.0186225	3.63405	1.54443	0.000199574	2		ATP2B3	0.022978	-0.622044	0.27357	0.00591693	9
	VPS53	0.018374	-0.599247	0.254134	0.00743868	7		MIER3	0.0186382	1.36948	0.58209	0.00138889	5		LMF1	0.0230016	0.369847	0.162684	0.0192234	11
	DYNC1H1	0.0184332	-0.722485	0.306553	0.00505077	24		SHE	0.0186437	1.86059	0.790871	0.000773352	6		ADAMTS1	0.0230269	-0.448034	0.197112	0.0123352	7
	SHE	0.0184992	1.54149	0.654428	0.00112969	7		RAD51D	0.0187125	0.649898	0.27641	0.00562191	14		RFESD	0.0230504	-3.41347	1.50201	0.000243724	3
	MCCC2	0.0185185	-0.583519	0.24777	0.00796268	14		OR52E6	0.0187473	0.443564	0.188709	0.0151796	15		TARS	0.0230841	0.46725	0.205652	0.0114559	14
	CCDC70	0.0186028	0.464184	0.19724	0.00987243	16		BPIFC	0.0187963	0.442148	0.188184	0.0149748	15		RASA3	0.023133	-0.791716	0.348585	0.00381894	15
	C17orf102	0.0186034	-0.947664	0.402681	0.00295849	4		HBEGF	0.0190163	0.955723	0.407521	0.00282405	4		CCR2	0.0231555	1.33955	0.589889	0.00138983	3
	CNGA2	0.0186116	-0.344157	0.14625	0.0239659	15		GALNTL4	0.0190242	-0.777334	0.331478	0.00449621	9		ARFIP2	0.0233659	10.3909	4.58273	2.33669e-05	2
	RAB40C	0.0186225	3.63405	1.54443	0.000199574	2		GNAI3	0.0191165	-1.56302	0.667032	0.00105966	5		HOXD8	0.0235902	-1.42443	0.629237	0.00117417	3
	MIER3	0.0186382	1.36948	0.58209	0.00138889	5		EMILIN3	0.0191388	-0.622824	0.265844	0.00693177	17		ZNHIT2	0.0237403	-3.96978	1.75553	0.000135839	3
	RAD51D	0.0187125	0.649898	0.27641	0.00562191	14		TNC	0.0191651	-0.209375	0.0893886	0.0570248	73		PELP1	0.0237488	1.40042	0.619332	0.00132465	4
	OR52E6	0.0187473	0.443564	0.188709	0.0151796	15		ENOPH1	0.0191802	-3.28004	1.40052	0.000242544	3		TNC	0.0238607	-0.28189	0.124765	0.0346599	44
	BPIFC	0.0187963	0.442148	0.188184	0.0149748	15		FAM20A	0.0192815	0.790195	0.337684	0.0041735	16		OXSR1	0.023866	1.21837	0.539275	0.00155989	2
	HBEGF	0.0190163	0.955723	0.407521	0.00282405	4		KSR1	0.0192873	0.616036	0.263271	0.00763515	9		SERPINA12	0.0238959	-0.38758	0.171587	0.0158633	10
	PKLR	0.0191	-0.411374	0.175533	0.0157231	15		MIOS	0.0193188	1.26679	0.54152	0.00165874	7		OR12D2	0.0239249	-0.360159	0.15948	0.0166339	7
	EMILIN3	0.0191388	-0.622824	0.265844	0.00693177	17		FPR2	0.0194527	-0.605566	0.25915	0.00695244	5		RAB38	0.0239789	-0.57586	0.255091	0.0072082	2
	TNC	0.0191651	-0.209375	0.0893886	0.0570248	73		ERCC8	0.0196348	0.667164	0.285937	0.00591388	11		SNX1	0.0240143	-1.31474	0.582541	0.00162655	3
	ENOPH1	0.0191802	-3.28004	1.40052	0.000242544	3		ENAM	0.0197516	0.409148	0.175522	0.0140262	21		PTPRZ1	0.0241499	0.573256	0.254245	0.00718402	24
	FAM20A	0.0192815	0.790195	0.337684	0.0041735	16		KITLG	0.0197787	-2.83306	1.21563	0.000302358	4		RBM47	0.0242007	-0.604535	0.268214	0.0064317	6
	MIOS	0.0193188	1.26679	0.54152	0.00165874	7		GPR31	0.0199449	-0.676252	0.290564	0.00602006	12		IL25	0.0242218	0.561538	0.249175	0.00748408	2
	PLA2G2C	0.019415	-2.5957	1.11048	0.000382157	2		OR5W2	0.0199848	0.878394	0.377539	0.0035784	10		OR51G1	0.0242304	-0.539496	0.239408	0.00811215	5
	FPR2	0.0194527	-0.605566	0.25915	0.00695244	5		THADA	0.0200319	0.224515	0.0965344	0.0474659	41		ACSM1	0.0242578	0.549425	0.243861	0.00790366	8
	ERCC8	0.0196348	0.667164	0.285937	0.00591388	11		TMEM106A	0.0200324	-0.750839	0.322839	0.00478682	8		C16orf96	0.0242612	-0.736818	0.327044	0.00446814	6
	KITLG	0.0197787	-2.83306	1.21563	0.000302358	4		RAB3D	0.0200465	-0.839697	0.361086	0.00363629	5		PSMC5	0.0242877	-1.47286	0.653862	0.00114289	2
	GPR31	0.0199449	-0.676252	0.290564	0.00602006	12		CHD6	0.0200491	0.319794	0.13752	0.0277002	36		RNF186	0.0243652	1.13466	0.503998	0.00205802	5
	TMEM106A	0.0200324	-0.750839	0.322839	0.00478682	8		STS	0.0200838	-0.686759	0.295408	0.00546815	11		NCAM2	0.0244193	-1.00886	0.448287	0.00216283	8
	STS	0.0200838	-0.686759	0.295408	0.00546815	11		PACSIN3	0.0200913	0.957161	0.411746	0.0032289	10		DAP	0.0244243	1.0012	0.444902	0.00235532	2
	PACSIN3	0.0200913	0.957161	0.411746	0.0032289	10		GSTK1	0.0201843	0.561161	0.241577	0.00800546	9		ZNF18	0.0245373	3.90073	1.73473	0.000172926	2
	GSTK1	0.0201843	0.561161	0.241577	0.00800546	9		ITIH6	0.0202408	0.257686	0.110983	0.033794	33		CXCR4	0.0245438	-2.42041	1.07645	0.000493853	2
	ITIH6	0.0202408	0.257686	0.110983	0.033794	33		LELP1	0.0202836	1.1292	0.486501	0.00201089	2		STK31	0.0245516	0.405564	0.18038	0.0149148	11
	LELP1	0.0202836	1.1292	0.486501	0.00201089	2		WEE1	0.0203462	0.982155	0.423361	0.00271112	5		FCRL6	0.0245774	0.842129	0.374616	0.00338238	5
	WEE1	0.0203462	0.982155	0.423361	0.00271112	5		CLCA2	0.0203869	0.351249	0.151456	0.0201534	28		CHCHD3	0.0246174	-1.70511	0.758719	0.000782886	2
	CLCA2	0.0203869	0.351249	0.151456	0.0201534	28		ITPRIPL1	0.0205464	0.440876	0.190343	0.0141026	18		PCDHA11	0.0246639	1.65037	0.734598	0.000854839	4
	ITPRIPL1	0.0205464	0.440876	0.190343	0.0141026	18		PPIF	0.0206968	2.6691	1.15372	0.000366906	4		OBSCN	0.0248376	0.191802	0.0854764	0.0715904	75
	PPIF	0.0206968	2.6691	1.15372	0.000366906	4		SIRPB2	0.0207387	0.624033	0.269828	0.0072776	11		DTL	0.0248797	3.38857	1.51055	0.000210189	4
	BPTF	0.0207029	0.365168	0.157852	0.0199054	26		PTH2R	0.0207538	0.520501	0.225088	0.00985377	17		CC2D2A	0.0249173	0.394317	0.175824	0.0151679	21
	SIRPB2	0.0207387	0.624033	0.269828	0.0072776	11		KLKB1	0.0207978	-0.331089	0.143227	0.022895	26		PLLP	0.0249246	1.17873	0.525615	0.00178246	4
	KLKB1	0.0207978	-0.331089	0.143227	0.022895	26		TPSD1	0.0208236	0.582627	0.252092	0.00640511	7		ADH1A	0.02496	-2.9456	1.31382	0.000281866	2
	DTL	0.0207997	0.87272	0.377539	0.00363948	9		FBN2	0.0209048	0.208989	0.0904831	0.0623119	57		TERF2	0.0250352	-0.774177	0.345482	0.00399224	2
	TPSD1	0.0208236	0.582627	0.252092	0.00640511	7		BEND2	0.0209423	-0.277612	0.120229	0.0208263	8		GDF2	0.0252631	1.11689	0.499199	0.00188817	4
	BEND2	0.0209423	-0.277612	0.120229	0.0208263	8		DYNC1H1	0.0210506	-0.741304	0.321318	0.00458551	21		PAPOLA	0.0252747	-3.76798	1.68426	0.000162924	3
	SYT13	0.0210455	-0.734204	0.318227	0.00477923	6		MURC	0.0210885	0.709662	0.307693	0.00517512	9		AASDHPPT	0.0252811	-4.04562	1.80844	0.000149184	2
	MURC	0.0210885	0.709662	0.307693	0.00517512	9		BTN1A1	0.0211091	0.481427	0.208769	0.0108952	14		NXF1	0.025337	-0.638187	0.285386	0.00731425	2
	BTN1A1	0.0211091	0.481427	0.208769	0.0108952	14		SMAD6	0.0212198	0.599621	0.260247	0.00699969	5		DOK5	0.0253668	1.7011	0.760858	0.000800324	6
	RTN1	0.0211875	-0.391854	0.170029	0.0194738	16		INSM2	0.0212297	0.552248	0.239704	0.00854552	9		LOXL4	0.0254342	0.415865	0.186091	0.0107747	23
	SMAD6	0.0212198	0.599621	0.260247	0.00699969	5		D2HGDH	0.0212972	-0.537658	0.233493	0.0107707	10		FBXL12	0.0254377	0.977898	0.437599	0.00247797	2
	INSM2	0.0212297	0.552248	0.239704	0.00854552	9		TSPAN15	0.0213178	0.492175	0.213775	0.0113573	8		SLC26A9	0.0255896	0.345118	0.154596	0.0223306	15
	D2HGDH	0.0212972	-0.537658	0.233493	0.0107707	10		ZNF785	0.0213199	1.81971	0.790399	0.000778999	6		FPR2	0.0256031	-0.617636	0.276696	0.00607585	2
	TSPAN15	0.0213178	0.492175	0.213775	0.0113573	8		AFM	0.0213426	0.356895	0.155046	0.0136593	14		BRWD1	0.025694	1.15992	0.519957	0.00192081	7
	ZNF785	0.0213199	1.81971	0.790399	0.000778999	6		KRT71	0.0213951	-0.331616	0.144122	0.0203854	15		SLC40A1	0.0257112	0.694723	0.311459	0.00524665	5
	AFM	0.0213426	0.356895	0.155046	0.0136593	14		TMEM217	0.0213976	0.994917	0.432404	0.00249409	5		ALDOC	0.0257383	-1.90205	0.852883	0.000630965	5
	TMEM217	0.0213976	0.994917	0.432404	0.00249409	5		HVCN1	0.0215235	0.481689	0.209551	0.0106619	4		POMC	0.0258568	0.876494	0.393337	0.00363777	5
	HVCN1	0.0215235	0.481689	0.209551	0.0106619	4		HS1BP3	0.0215689	0.35893	0.156201	0.0185644	14		GCC1	0.0258619	0.454066	0.203774	0.0126373	9
	HS1BP3	0.0215689	0.35893	0.156201	0.0185644	14		CSTL1	0.0216762	-0.634006	0.276136	0.00811692	6		MURC	0.0258748	1.42863	0.641191	0.00130312	7
	CSTL1	0.0216762	-0.634006	0.276136	0.00811692	6		VWA5A	0.0217811	-0.42828	0.186682	0.015384	26		OR4D5	0.0259413	-0.636257	0.28569	0.00680947	8
	EPYC	0.021791	0.56221	0.24508	0.00815566	11		EPYC	0.021791	0.56221	0.24508	0.00815566	11		ZNF469	0.0260784	0.35109	0.15779	0.0236917	8
	CEACAM18	0.0217992	-0.452848	0.197419	0.0122548	12		CEACAM18	0.0217992	-0.452848	0.197419	0.0122548	12		SCRG1	0.0261145	-3.18862	1.43341	0.000216411	2
	ANXA9	0.021815	0.381697	0.16642	0.018442	16		ANXA9	0.021815	0.381697	0.16642	0.018442	16		COL9A3	0.0261223	-0.483475	0.217352	0.0115646	18
	B4GALNT4	0.0218446	-0.444861	0.194003	0.0159471	16		B4GALNT4	0.0218446	-0.444861	0.194003	0.0159471	16		MAP3K8	0.0261814	1.37495	0.61837	0.00117555	5
	ASUN	0.0219409	-0.599251	0.261523	0.00783512	5		ASUN	0.0219409	-0.599251	0.261523	0.00783512	5		CIB3	0.0265129	2.17301	0.979445	0.000479602	3
	C5	0.0219983	-0.403973	0.176377	0.0160458	24		NAP1L2	0.0220656	1.53245	0.669415	0.00089339	5		LRRN1	0.0266158	0.534471	0.241067	0.00803009	10
	NAP1L2	0.0220656	1.53245	0.669415	0.00089339	5		ATAD5	0.0222196	0.431017	0.188497	0.0134798	22		XRCC2	0.0266889	-1.89436	0.85484	0.000860963	2
	CGN	0.0222493	0.261845	0.114538	0.0351764	44		CGN	0.0222493	0.261845	0.114538	0.0351764	44		TUBGCP2	0.0266891	-0.791964	0.357379	0.0037812	11
	SS18	0.0223075	-0.599144	0.262197	0.00816725	5		ABCA7	0.0222532	0.209592	0.0916841	0.0586471	69		C14orf133	0.026826	-0.858679	0.387833	0.0034326	13
	USP38	0.0223971	-0.780229	0.341671	0.00426937	9		SS18	0.0223075	-0.599144	0.262197	0.00816725	5		ACP6	0.0269952	0.519604	0.234946	0.00857301	9
	ZDHHC1	0.0224128	1.009	0.441904	0.00267408	6		TEX2	0.0223251	-0.440893	0.192969	0.0110763	19		ZNF541	0.0271386	-0.648042	0.293296	0.00587293	3
	HIPK4	0.0224163	-0.371866	0.162868	0.0186824	17		USP38	0.0223971	-0.780229	0.341671	0.00426937	9		KLF12	0.0272105	-1.72911	0.782941	0.000782813	3
	PRMT5	0.0225066	0.722904	0.316826	0.00641681	5		HIPK4	0.0224163	-0.371866	0.162868	0.0186824	17		NDNF	0.0273243	-0.632862	0.286771	0.00680666	9
	NUDT13	0.0226027	-0.480602	0.210782	0.0114975	17		MEOX1	0.0224928	-0.903604	0.39598	0.00344655	9		MIB2	0.0274051	-0.579291	0.262634	0.00761381	5
	ACR	0.0226611	-2.80083	1.22892	0.000321303	3		UQCRB	0.0225114	-2.82519	1.23824	0.000327131	2		ASNSD1	0.0275731	2.77154	1.2579	0.000309609	3
	HAGHL	0.0227104	2.2003	0.965775	0.000971881	3		NUDT13	0.0226027	-0.480602	0.210782	0.0114975	17		C7orf34	0.0276371	-1.60187	0.727331	0.000893935	2
	PCDHGA4	0.0228415	0.373391	0.16405	0.0182873	12		ACR	0.0226611	-2.80083	1.22892	0.000321303	3		LRRC37A3	0.0277073	0.70566	0.32055	0.00530519	2
	MIA3	0.0228831	0.282899	0.12433	0.0301001	40		HAGHL	0.0227104	2.2003	0.965775	0.000971881	3		FAM102A	0.027714	0.996573	0.452718	0.00228093	3
	GSTA2	0.0229332	-2.08751	0.917768	0.000614697	3		SERPINE2	0.0227503	0.492887	0.216406	0.0122464	7		PTCD3	0.0277215	-0.560307	0.254546	0.00743287	12
	TXNDC9	0.0229959	-0.573282	0.252158	0.00913547	2		GJB4	0.0227587	0.471391	0.206981	0.0112426	15		KIAA0232	0.0277249	-0.75376	0.342438	0.00470958	9
	LSMD1	0.023133	1.40908	0.620405	0.001265	4		MIA3	0.0228831	0.282899	0.12433	0.0301001	40		ATRIP	0.0278106	0.445913	0.202693	0.0137634	7
	TTBK1	0.0233063	0.493902	0.217734	0.0103421	11		GSTA2	0.0229332	-2.08751	0.917768	0.000614697	3		ANXA10	0.0279101	-0.482701	0.219554	0.0105597	10
	ALDH3A2	0.0233756	0.47751	0.210613	0.0109005	8		TXNDC9	0.0229959	-0.573282	0.252158	0.00913547	2		ZNF264	0.027922	-1.40632	0.639708	0.00117169	6
	NFKBIE	0.0234019	4.06332	1.79253	0.000229403	3		ZDHHC1	0.0230901	1.01444	0.446509	0.00262734	5		EYA4	0.0281853	-0.699503	0.318724	0.00518361	5
	SMOX	0.0234164	-0.574502	0.253467	0.00799499	7		GABPA	0.0230934	1.97119	0.867646	0.000660451	3		ZNF643	0.0281885	0.480844	0.219098	0.0101802	6
	C14orf178	0.0234205	2.65356	1.17077	0.000351663	2		ARFIP2	0.0233659	10.3909	4.58273	2.33669e-05	2		AQP2	0.0282202	-2.81025	1.28075	0.000280424	3
	TEX2	0.023527	-0.43662	0.192788	0.0110997	20		ALDH3A2	0.0233756	0.47751	0.210613	0.0109005	8		PPP1R7	0.0282228	1.37308	0.625784	0.00120341	4
	HOXD8	0.0235902	-1.42443	0.629237	0.00117417	3		NFKBIE	0.0234019	4.06332	1.79253	0.000229403	3		ITGA8	0.0282599	-0.759164	0.346072	0.00384982	13
	C22orf40	0.023717	-3.49427	1.54499	0.00019281	2		C14orf178	0.0234205	2.65356	1.17077	0.000351663	2		2001-12-01	0.0282827	1.92726	0.878687	0.0006784	2
	C3orf79	0.0237303	0.836125	0.369727	0.00365035	3		HOXD8	0.0235902	-1.42443	0.629237	0.00117417	3		PGLYRP3	0.0283217	0.452417	0.206319	0.0110739	12
	FITM1	0.0237511	-0.813056	0.359579	0.00373586	9		GRIK5	0.0236887	-0.841476	0.371982	0.00341151	8		FBN3	0.0286556	-0.228738	0.104533	0.0478307	67
	IL4	0.0238451	3.76276	1.66522	0.00016115	5		C22orf40	0.023717	-3.49427	1.54499	0.00019281	2		GPR97	0.0288207	-0.542654	0.248249	0.00996789	4
	VWA5A	0.0238461	-0.406822	0.180042	0.0166433	27		C3orf79	0.0237303	0.836125	0.369727	0.00365035	3		TBC1D19	0.0288253	-0.690599	0.315938	0.00483902	6
	CBR1	0.0238473	0.574315	0.254169	0.00730766	8		FITM1	0.0237511	-0.813056	0.359579	0.00373586	9		TBX4	0.0289517	-1.70599	0.781079	0.000781434	6
	HERPUD2	0.0239649	-0.500085	0.221503	0.0095765	6		HERPUD2	0.0239649	-0.500085	0.221503	0.0095765	6		DDX60L	0.0290065	-0.455751	0.208735	0.0114231	18
	C16orf11	0.024097	0.676652	0.29999	0.0105987	5		SNX1	0.0240143	-1.31474	0.582541	0.00162655	3		FANCF	0.0290279	-3.73812	1.71229	0.000163592	2
	MOCS1	0.0241182	0.498262	0.220935	0.00862576	18		VPS13D	0.024092	0.224911	0.0997098	0.0506055	73		ENTPD2	0.029128	-0.967126	0.44328	0.00266458	9
	STAP2	0.0242059	1.17024	0.519219	0.00187233	9		C16orf11	0.024097	0.676652	0.29999	0.0105987	5		SLC52A1	0.0291526	-1.74357	0.799283	0.00080345	4
	SVEP1	0.0242258	0.179159	0.0795014	0.0734738	66		MOCS1	0.0241182	0.498262	0.220935	0.00862576	18		SCN8A	0.0291584	-1.81681	0.832886	0.000674441	2
	RRP1B	0.0242311	-0.44301	0.196592	0.0123621	11		STAP2	0.0242059	1.17024	0.519219	0.00187233	9		ABCC8	0.0292169	0.741202	0.339915	0.00412304	15
	SV2C	0.0242492	-0.505114	0.22418	0.0105412	16		TPH2	0.024225	0.624855	0.277277	0.00636468	8		ZFHX4	0.0292258	0.494287	0.226693	0.00935076	11
	TPH2	0.0242582	0.621989	0.276069	0.00641726	9		RRP1B	0.0242311	-0.44301	0.196592	0.0123621	11		ASUN	0.0293546	-0.578219	0.265397	0.00765402	3
	PAX5	0.024341	0.612038	0.271811	0.0068839	5		SV2C	0.0242492	-0.505114	0.22418	0.0105412	16		CORIN	0.0294299	0.287704	0.132115	0.0179806	20
	SEC14L1	0.0243713	0.565015	0.250981	0.00850519	10		PAX5	0.024341	0.612038	0.271811	0.0068839	5		SMYD5	0.0294763	-0.715407	0.328612	0.00434984	5
	CXCR4	0.0245438	-2.42041	1.07645	0.000493853	2		SEC14L1	0.0243713	0.565015	0.250981	0.00850519	10		USP38	0.0296118	-2.98677	1.37307	0.000251243	2
	ARHGEF19	0.0245562	-0.604921	0.269055	0.00587508	11		CXCR4	0.0245438	-2.42041	1.07645	0.000493853	2		MAP4K2	0.0296384	-0.697912	0.320895	0.00483601	5
	ZNF469	0.024571	0.156642	0.0696779	0.0853446	37		ARHGEF19	0.0245562	-0.604921	0.269055	0.00587508	11		HCST	0.0296765	-1.29626	0.596151	0.00136809	3
	RPL3L	0.0246094	-0.334954	0.149035	0.0225007	24		HIST1H1B	0.0246062	-0.588106	0.261668	0.00916179	5		TRMT5	0.0297534	0.574122	0.264164	0.00801313	7
	SLAMF1	0.0246386	0.584635	0.260182	0.00754484	9		SLAMF1	0.0246386	0.584635	0.260182	0.00754484	9		TSPAN9	0.0298094	2.72758	1.25544	0.000297977	3
	KLHL22	0.0246618	-1.14185	0.508242	0.00186769	5		KLHL22	0.0246618	-1.14185	0.508242	0.00186769	5		SLCO6A1	0.0298365	-0.9022	0.415329	0.00275311	5
	ANKRD16	0.0246798	-0.809525	0.360369	0.00386642	7		ANKRD16	0.0246798	-0.809525	0.360369	0.00386642	7		FKBP5	0.0298594	2.28981	1.05426	0.000420623	2
	DCD	0.0247172	0.486606	0.216674	0.0101155	5		SLIT2	0.0246948	-0.384847	0.171337	0.015444	24		RRAGD	0.0299115	-1.51724	0.698784	0.000934662	2
	DSG2	0.0247377	-0.293059	0.130511	0.0266814	29		DCD	0.0247172	0.486606	0.216674	0.0101155	5		ZNF500	0.0299279	5.3049	2.44348	7.75854e-05	2
	THBD	0.0247667	0.482385	0.214869	0.0102908	8		DSG2	0.0247377	-0.293059	0.130511	0.0266814	29		SRSF4	0.030057	1.30586	0.601963	0.00129114	2
	LCLAT1	0.0248101	0.793888	0.353728	0.00429004	7		THBD	0.0247667	0.482385	0.214869	0.0102908	8		FAM212B	0.0301033	-4.73588	2.18371	9.93135e-05	2
	EIF2B5	0.0248686	0.979331	0.436531	0.00254865	9		EIF2B5	0.0248686	0.979331	0.436531	0.00254865	9		CUTA	0.0301263	1.83685	0.847087	0.000932549	3
	LMBRD2	0.0248778	-0.778006	0.346814	0.00424946	6		LMBRD2	0.0248778	-0.778006	0.346814	0.00424946	6		OR52E4	0.0301284	-2.31464	1.06744	0.000420639	2
	ZNF195	0.0248935	0.96054	0.428229	0.00267038	5		ADH1A	0.02496	-2.9456	1.31382	0.000281866	2		DUSP1	0.0301735	-2.13374	0.984285	0.00115886	2
	KSR1	0.0249534	0.574753	0.256343	0.00802656	10		UBAC2	0.0250739	1.1879	0.530252	0.00164741	3		ECE1	0.0302928	1.20486	0.556199	0.00165258	13
	ADH1A	0.02496	-2.9456	1.31382	0.000281866	2		ARL11	0.0250866	-0.868452	0.38769	0.00348548	6		KIF3C	0.0304066	1.21047	0.559171	0.00163584	3
	UBAC2	0.0250739	1.1879	0.530252	0.00164741	3		C6orf195	0.0251588	-0.49283	0.220116	0.0103684	7		C19orf75	0.0304935	1.35673	0.627063	0.00115687	2
	SERPINE2	0.0250763	0.482365	0.21532	0.0123632	8		MGLL	0.0252235	-0.557901	0.24929	0.0074897	10		SLCO2A1	0.0306826	-0.597021	0.27625	0.00645748	14
	ARL11	0.0250866	-0.868452	0.38769	0.00348548	6		PAPOLA	0.0252747	-3.76798	1.68426	0.000162924	3		TSPAN2	0.0308611	0.646571	0.299497	0.00570792	6
	C6orf195	0.0251588	-0.49283	0.220116	0.0103684	7		SMAP2	0.0253311	0.648364	0.289925	0.00603766	7		HSD17B8	0.0309332	1.13238	0.524752	0.0025232	4
	GCNT2	0.0251816	0.294566	0.131585	0.0289873	26		POP1	0.0253396	0.480571	0.214907	0.0102304	27		HSPA4	0.0310722	0.464268	0.215323	0.0100886	7
	MGLL	0.0252235	-0.557901	0.24929	0.0074897	10		BPTF	0.0253818	0.362499	0.162153	0.0189416	24		TPP1	0.0311582	-0.564835	0.262099	0.00717664	12
	PAPOLA	0.0252747	-3.76798	1.68426	0.000162924	3		IL18RAP	0.0255196	0.476097	0.213167	0.010311	11		F2RL1	0.031177	-1.03328	0.479523	0.00201084	4
	SMAP2	0.0253311	0.648364	0.289925	0.00603766	7		CD3D	0.0255854	-2.28688	1.02438	0.000438351	3		OR6X1	0.0311786	-1.01064	0.469022	0.00223157	3
	POP1	0.0253396	0.480571	0.214907	0.0102304	27		MLL	0.0256259	-0.34768	0.155782	0.0206135	32		GTF2E2	0.0311887	0.60731	0.281859	0.00596258	4
	SAPCD1	0.0254646	0.318628	0.142609	0.0290802	12		FAM89A	0.0257557	0.808745	0.362686	0.00415627	5		KIF17	0.0312481	0.55275	0.256628	0.00748753	18
	IL18RAP	0.0255196	0.476097	0.213167	0.010311	11		C15orf26	0.0257612	-1.42426	0.638739	0.00116117	6		TFCP2L1	0.0312737	1.80716	0.839145	0.000688419	3
	CD3D	0.0255854	-2.28688	1.02438	0.000438351	3		ANXA10	0.0258164	-0.489276	0.219508	0.0105656	11		ORC2	0.0312961	-3.09369	1.43673	0.000228083	2
	MLL	0.0256259	-0.34768	0.155782	0.0206135	32		NUP214	0.0258485	-0.302323	0.135663	0.026132	43		IKZF2	0.0314244	-0.69789	0.32435	0.00445144	7
	NOTUM	0.0257048	-0.692708	0.310542	0.00463192	12		DBP	0.02586	-0.591304	0.26536	0.0066445	2		PINK1	0.0315368	-0.639519	0.297418	0.00553039	11
	FAM89A	0.0257557	0.808745	0.362686	0.00415627	5		LRRN2	0.0259331	0.51235	0.230041	0.0102796	19		NKD2	0.0316004	1.0321	0.480173	0.00242249	7
	C15orf26	0.0257612	-1.42426	0.638739	0.00116117	6		CHST6	0.0259825	0.825483	0.370758	0.00336218	9		AARS2	0.0316585	0.383924	0.178677	0.0152956	18
	ANXA10	0.0258164	-0.489276	0.219508	0.0105656	11		BIRC8	0.0259921	-0.501591	0.225299	0.0115029	10		CNGA2	0.0316912	-0.404745	0.188404	0.0137485	13
	DBP	0.02586	-0.591304	0.26536	0.0066445	2		STARD6	0.0260518	0.669659	0.300911	0.00527099	6		FAM102B	0.0316995	1.63065	0.759086	0.000896449	3
	LRRN2	0.0259331	0.51235	0.230041	0.0102796	19		GPR75	0.0260657	0.63886	0.287098	0.00597531	13		ZNF266	0.0317485	-1.57982	0.735636	0.000898035	4
	BIRC8	0.0259921	-0.501591	0.225299	0.0115029	10		AICDA	0.0261054	1.49695	0.672894	0.00106938	2		CCDC93	0.0317635	-1.20167	0.5596	0.0015073	6
	KRT71	0.0260465	-0.318908	0.143296	0.0206724	17		SCRG1	0.0261145	-3.18862	1.43341	0.000216411	2		SLCO1A2	0.0318084	-0.889347	0.414264	0.00292656	6
	STARD6	0.0260518	0.669659	0.300911	0.00527099	6		ZNF692	0.0261637	1.16898	0.525674	0.00185296	14		TPH2	0.031822	0.623513	0.29046	0.0057597	5
	GPR75	0.0260657	0.63886	0.287098	0.00597531	13		MAP3K8	0.0261814	1.37495	0.61837	0.00117555	5		BTN2A1	0.0318342	-1.18667	0.552844	0.00153059	5
	AICDA	0.0261054	1.49695	0.672894	0.00106938	2		PPFIA2	0.0261942	-0.419075	0.188491	0.0136007	10		RPTOR	0.0319372	0.554625	0.258543	0.00745825	10
	SCRG1	0.0261145	-3.18862	1.43341	0.000216411	2		RIPPLY1	0.0262066	-0.881256	0.396402	0.002752	2		OR52E6	0.0319553	0.634392	0.295758	0.00629555	8
	ZNF692	0.0261637	1.16898	0.525674	0.00185296	14		SPTBN5	0.026216	-0.197823	0.0889895	0.0667119	78		SVOPL	0.0319571	0.438366	0.204372	0.0114216	18
	MAP3K8	0.0261814	1.37495	0.61837	0.00117555	5		N4BP2	0.0262963	-0.272938	0.122845	0.0355106	34		SUSD1	0.0320148	0.506912	0.236408	0.00843613	7
	RIPPLY1	0.0262066	-0.881256	0.396402	0.002752	2		GPRIN3	0.0263239	-0.200467	0.0902438	0.0406375	33		ST8SIA6	0.0321213	1.83625	0.856902	0.000645263	4
	SPTBN5	0.026216	-0.197823	0.0889895	0.0667119	78		THBS1	0.0264412	-0.798022	0.359523	0.00403124	17		KIAA0556	0.0322113	0.391827	0.182944	0.0153638	24
	PCDHGA1	0.0262292	-0.472347	0.212501	0.011362	10		ZNF709	0.0265765	-1.05157	0.474173	0.00210826	5		OR5V1	0.0322415	0.65104	0.304025	0.00946927	4
	GPRIN3	0.0263239	-0.200467	0.0902438	0.0406375	33		CHRNA6	0.0267562	0.669068	0.302055	0.00530689	14		MCTS1	0.0323829	0.599951	0.280396	0.00516577	2
	THBS1	0.0264412	-0.798022	0.359523	0.00403124	17		RNGTT	0.0267592	0.459724	0.207549	0.0109557	5		ZDHHC13	0.0324469	1.793	0.838295	0.000701945	5
	THADA	0.026557	0.212284	0.0957108	0.0482783	45		POMC	0.0267924	0.849151	0.383445	0.00381918	6		GRIN2A	0.0324634	0.515325	0.240957	0.00815535	7
	C9orf174	0.0265712	-0.177268	0.0799312	0.0566593	42		CCDC167	0.0269461	1.59081	0.719075	0.00088801	2		TMCC3	0.0325337	-0.677573	0.31695	0.00472359	10
	ZNF709	0.0265765	-1.05157	0.474173	0.00210826	5		SEL1L3	0.0269603	-0.339004	0.15325	0.0209378	20		CHRNA6	0.0325519	0.676121	0.316304	0.00485706	11
	THBS3	0.0265963	-0.953105	0.429832	0.00283262	14		MAF	0.0269613	-2.83218	1.28033	0.000292214	2		OR7G2	0.0325599	0.508264	0.237788	0.0090253	3
	CHRNA6	0.0267562	0.669068	0.302055	0.00530689	14		ZNF121	0.0270562	2.15547	0.975015	0.000481114	3		RAB27B	0.0326112	-1.92304	0.899948	0.00058416	3
	RNGTT	0.0267592	0.459724	0.207549	0.0109557	5		ZCCHC16	0.0270876	-1.11736	0.505535	0.00176884	8		ODZ1	0.0326401	0.355796	0.166534	0.018457	15
	POMC	0.0267924	0.849151	0.383445	0.00381918	6		HYLS1	0.0271355	-0.874197	0.395642	0.00323757	7		KCNS1	0.0326615	0.699901	0.327635	0.0043615	4
	N4BP2	0.0268205	-0.268742	0.121376	0.0364895	38		ZNF541	0.0271386	-0.648042	0.293296	0.00587293	3		LACTB2	0.0326997	2.53465	1.18677	0.000344807	2
	CCDC167	0.0269461	1.59081	0.719075	0.00088801	2		KLF12	0.0272105	-1.72911	0.782941	0.000782813	3		DMD	0.0327184	0.52412	0.245429	0.00756514	21
	SEL1L3	0.0269603	-0.339004	0.15325	0.0209378	20		NDNF	0.0273243	-0.632862	0.286771	0.00680666	9		BBOX1	0.0327585	-0.535176	0.250664	0.00767228	6
	ZNF121	0.0270562	2.15547	0.975015	0.000481114	3		FTSJ3	0.0274395	0.369156	0.167402	0.0149476	23		FAM69A	0.0328625	-3.37105	1.57986	0.00019763	2
	ZCCHC16	0.0270876	-1.11736	0.505535	0.00176884	8		RHOBTB1	0.0275088	0.745962	0.338425	0.00416739	14		DLEC1	0.0328985	0.465273	0.218098	0.0098722	25
	HYLS1	0.0271355	-0.874197	0.395642	0.00323757	7		FAM81B	0.0275644	-0.273507	0.124128	0.0315625	17		FAM47E	0.0328988	-0.403215	0.189009	0.013811	3
	DNAH3	0.0271893	-0.134267	0.0607878	0.121755	116		BRE	0.0276564	-0.563965	0.2561	0.00753874	6		PRKCZ	0.0329177	1.4954	0.70105	0.00117484	4
	NDNF	0.0273243	-0.632862	0.286771	0.00680666	9		FBXW5	0.0276577	-0.32283	0.146601	0.024192	25		ANGPT2	0.0329632	0.452173	0.212036	0.0094929	6
	HIST1H1B	0.0273398	-0.50351	0.22818	0.0112713	9		PNLIPRP3	0.0277006	0.442637	0.201061	0.0120837	11		C10orf12	0.033183	1.16491	0.546942	0.00159671	5
	FTSJ3	0.0274395	0.369156	0.167402	0.0149476	23		KIAA1324	0.0277221	-0.44853	0.203766	0.0114072	22		SEMA6B	0.0333542	0.803748	0.377738	0.00392679	8
	FAM81B	0.0275644	-0.273507	0.124128	0.0315625	17		P4HA2	0.0277323	0.786475	0.357318	0.00381308	13		FLYWCH1	0.0334125	-0.911639	0.428585	0.00279213	4
	BRE	0.0276564	-0.563965	0.2561	0.00753874	6		BMP2	0.0277895	2.01555	0.916055	0.000542802	5		PPFIA2	0.0335023	-0.40244	0.189293	0.0134819	9
	PNLIPRP3	0.0277006	0.442637	0.201061	0.0120837	11		RPTOR	0.0277931	0.55744	0.25336	0.00775064	12		TTC24	0.033541	0.864208	0.406581	0.00297296	2
	P4HA2	0.0277323	0.786475	0.357318	0.00381308	13		TROVE2	0.0278276	-0.702521	0.31937	0.00454575	6		SPDYC	0.0335679	4.53838	2.13548	9.93411e-05	2
	AKAP10	0.0277497	-0.486045	0.220849	0.0101621	12		CATSPER3	0.0278404	-0.412432	0.18751	0.0134821	15		PURG	0.033586	-1.7038	0.801785	0.000727263	2
	BMP2	0.0277895	2.01555	0.916055	0.000542802	5		SLAMF6	0.0278407	-0.768793	0.349527	0.00378553	6		BNIP2	0.0337468	1.70544	0.803284	0.000745049	6
	RPTOR	0.0277931	0.55744	0.25336	0.00775064	12		LY6D	0.0278542	1.35193	0.614701	0.00137458	3		SLC28A3	0.0338155	1.0372	0.488721	0.00225369	8
	TROVE2	0.0278276	-0.702521	0.31937	0.00454575	6		NCCRP1	0.0280226	1.24142	0.565061	0.00146141	8		ZDBF2	0.0339341	0.404636	0.190789	0.0146911	9
	CATSPER3	0.0278404	-0.412432	0.18751	0.0134821	15		PRDM2	0.0281697	0.315332	0.143665	0.0221687	38		MAP3K7	0.0340895	1.93803	0.914594	0.000674131	2
	LY6D	0.0278542	1.35193	0.614701	0.00137458	3		AQP2	0.0282202	-2.81025	1.28075	0.000280424	3		CNOT6	0.0341837	-0.938592	0.443172	0.00240471	6
	NCCRP1	0.0280226	1.24142	0.565061	0.00146141	8		2001-12-01	0.0282827	1.92726	0.878687	0.0006784	2		MAP7D2	0.0342108	1.29082	0.609575	0.00122456	4
	SLAMF6	0.0281468	-0.630217	0.287084	0.00498332	10		GTF2E2	0.0283383	0.521625	0.237906	0.00833438	5		RHCE	0.0342491	-2.90364	1.3715	0.000281335	2
	PRDM2	0.0281697	0.315332	0.143665	0.0221687	38		SERTAD1	0.028362	-1.00329	0.457653	0.00266805	3		KDM3A	0.0342553	-0.926478	0.437626	0.00244647	5
	AQP2	0.0282202	-2.81025	1.28075	0.000280424	3		DTL	0.0283852	0.842906	0.384551	0.00351096	8		KLC4	0.0343025	-0.932069	0.440383	0.00251709	7
	2001-12-01	0.0282827	1.92726	0.878687	0.0006784	2		IMPA1	0.0284593	0.61606	0.281191	0.00754627	3		ZCCHC24	0.03432	1.66739	0.787881	0.000736288	3
	GTF2E2	0.0283383	0.521625	0.237906	0.00833438	5		NIT1	0.0284876	1.04789	0.478378	0.00213085	9		MRPL45	0.0344524	1.5544	0.735033	0.0010954	8
	SERTAD1	0.028362	-1.00329	0.457653	0.00266805	3		LRRTM1	0.0285226	-0.560353	0.255866	0.00745052	8		SLC25A44	0.0344674	-1.47466	0.697384	0.00103144	2
	IMPA1	0.0284593	0.61606	0.281191	0.00754627	3		ADCY1	0.028575	0.529495	0.241856	0.00805165	5		FGR	0.0345207	-1.68982	0.799373	0.000907661	3
	NIT1	0.0284876	1.04789	0.478378	0.00213085	9		DMD	0.0286623	0.2037	0.0930946	0.0469763	53		PNPLA2	0.0345634	-1.36557	0.646135	0.0012277	4
	LRRTM1	0.0285226	-0.560353	0.255866	0.00745052	8		C14orf93	0.02871	-0.661968	0.302622	0.00568984	9		ODZ4	0.0345714	-0.303743	0.143726	0.0224625	28
	C14orf93	0.02871	-0.661968	0.302622	0.00568984	9		SPATA5	0.0287277	-0.469301	0.214567	0.0105185	14		NAALAD2	0.0346973	0.483834	0.229102	0.0097634	8
	SPATA5	0.0287277	-0.469301	0.214567	0.0105185	14		FRMPD1	0.0287828	0.144831	0.0662405	0.0536663	41		HAGHL	0.0347337	2.06343	0.977256	0.000959363	2
	FRMPD1	0.0287828	0.144831	0.0662405	0.0536663	41		C2orf84	0.0288347	1.12621	0.515253	0.00182135	4		LPCAT2	0.034922	-0.477134	0.226209	0.00922548	9
	WDR96	0.028784	0.242998	0.111139	0.0404132	50		MPDZ	0.0288416	-0.149194	0.0682608	0.0930124	63		HHATL	0.0349491	0.503616	0.2388	0.00835175	17
	C2orf84	0.0288347	1.12621	0.515253	0.00182135	4		OR56B1	0.0288728	-0.377563	0.17278	0.0166923	13		RABEP2	0.0350076	1.3822	0.655609	0.00107969	4
	MPDZ	0.0288416	-0.149194	0.0682608	0.0930124	63		MYO5A	0.0290019	-0.523528	0.23977	0.00824207	17		NR6A1	0.0350744	1.79486	0.851655	0.000683993	2
	OR56B1	0.0288728	-0.377563	0.17278	0.0166923	13		RPL3L	0.0290688	-0.327598	0.150098	0.0222026	23		MRPS27	0.0351338	1.07845	0.511889	0.00182044	5
	MYO5A	0.0290019	-0.523528	0.23977	0.00824207	17		AASDHPPT	0.0290811	-3.88566	1.78046	0.000155448	3		STRN3	0.0351809	1.27055	0.603224	0.00134054	7
	AASDHPPT	0.0290811	-3.88566	1.78046	0.000155448	3		NHS	0.0292538	-0.39478	0.181088	0.0127386	18		NOBOX	0.0356092	0.570643	0.271559	0.00648309	4
	FBXW5	0.0290854	-0.316782	0.145158	0.0248535	26		FAM70B	0.0292686	0.374696	0.171891	0.0189729	20		FASTKD1	0.0356469	-0.878008	0.417914	0.00329066	9
	RAB3D	0.0291068	-0.699641	0.320636	0.00433578	9		SIGLEC11	0.0293708	-0.851318	0.390787	0.00359467	5		RERG	0.0356666	-1.24977	0.59493	0.00134589	3
	NHS	0.0292538	-0.39478	0.181088	0.0127386	18		ATP9B	0.0294053	0.309567	0.142133	0.0268577	33		RFX1	0.0358066	0.902161	0.429781	0.00265683	3
	FAM70B	0.0292686	0.374696	0.171891	0.0189729	20		SMYD5	0.0294763	-0.715407	0.328612	0.00434984	5		A2ML1	0.0358282	-0.369327	0.175965	0.0163693	17
	OR5F1	0.0293327	-0.426242	0.195615	0.0129679	4		HSD3B7	0.0294994	-0.750136	0.344613	0.0040453	9		SIGLEC15	0.0359486	2.72659	1.29992	0.000283903	2
	SIGLEC11	0.0293708	-0.851318	0.390787	0.00359467	5		NXF1	0.0295393	-0.591241	0.271683	0.00790426	3		NPR2	0.0359737	1.60732	0.766405	0.000788695	6
	ATP9B	0.0294053	0.309567	0.142133	0.0268577	33		SULF2	0.0295403	0.529132	0.243145	0.00851672	22		CHMP1A	0.0360778	0.705445	0.336559	0.00406969	5
	SMYD5	0.0294763	-0.715407	0.328612	0.00434984	5		DNAH3	0.0295864	-0.132247	0.0607868	0.121732	115		C11orf65	0.0361334	0.662698	0.31626	0.00732431	6
	HSD3B7	0.0294994	-0.750136	0.344613	0.0040453	9		CEP350	0.0295957	-0.223307	0.102648	0.0435679	56		ANXA9	0.0364739	0.463209	0.221461	0.00965325	12
	NXF1	0.0295393	-0.591241	0.271683	0.00790426	3		HCST	0.0296765	-1.29626	0.596151	0.00136809	3		CLTCL1	0.0364947	-0.286615	0.137046	0.0244814	28
	CEP350	0.0295957	-0.223307	0.102648	0.0435679	56		CCDC41	0.0296768	-0.507768	0.233523	0.00959165	18		NPY1R	0.0365253	3.2043	1.5324	0.000198627	2
	HCST	0.0296765	-1.29626	0.596151	0.00136809	3		SERPINB13	0.0296984	-0.871846	0.401016	0.0028919	7		C10orf26	0.0366313	1.59229	0.761917	0.000842867	3
	CCDC41	0.0296768	-0.507768	0.233523	0.00959165	18		CPA2	0.0297634	0.474043	0.218129	0.0117421	11		IQSEC1	0.0366652	-0.563182	0.269533	0.00651087	13
	SERPINB13	0.0296984	-0.871846	0.401016	0.0028919	7		MPZL3	0.0298446	-0.445665	0.205173	0.0130416	7		PCM1	0.036684	0.382275	0.182971	0.0156952	30
	CPA2	0.0297634	0.474043	0.218129	0.0117421	11		LILRA3	0.0298534	-1.40773	0.648119	0.00112629	5		DYNC1I2	0.0367032	-1.87226	0.896224	0.000633595	4
	MPZL3	0.0298446	-0.445665	0.205173	0.0130416	7		RRAGD	0.0299115	-1.51724	0.698784	0.000934662	2		NR5A2	0.0367276	2.90162	1.38914	0.000251189	2
	LILRA3	0.0298534	-1.40773	0.648119	0.00112629	5		AGBL4	0.029924	-0.435507	0.200593	0.0124501	6		OR4D9	0.036836	-0.6288	0.301211	0.00602048	3
	RRAGD	0.0299115	-1.51724	0.698784	0.000934662	2		SETD3	0.0299903	1.13808	0.524409	0.00150373	9		SPPL2C	0.0369163	-0.533357	0.2556	0.0094957	14
	AGBL4	0.029924	-0.435507	0.200593	0.0124501	6		DUSP1	0.0301735	-2.13374	0.984285	0.00115886	2		FOSB	0.0369542	-1.08539	0.520255	0.00181109	3
	SLC25A12	0.0299808	-1.66919	0.769092	0.000904956	5		TMEM63C	0.0302275	-0.550201	0.253888	0.0074506	11		RFPL1	0.0369857	1.73839	0.833394	0.000695237	2
	DUSP1	0.0301735	-2.13374	0.984285	0.00115886	2		MAP4K2	0.0302451	-0.626575	0.289162	0.00590529	9		RNF113B	0.0370059	0.907231	0.434977	0.00262436	5
	PLEKHH2	0.0303032	0.308696	0.142512	0.0263414	26		PLEKHH2	0.0303032	0.308696	0.142512	0.0263414	26		NELL2	0.0370309	-0.758033	0.363491	0.00364247	12
	MLPH	0.0303098	-0.411994	0.190208	0.00947682	19		MLPH	0.0303098	-0.411994	0.190208	0.00947682	19		EPB41L5	0.0370443	0.510921	0.245013	0.0107002	7
	GABPA	0.03035	1.82911	0.844664	0.0006955	4		EML4	0.0304034	-0.983668	0.454393	0.00232039	11		COG4	0.0374305	-0.511928	0.245996	0.00978375	11
	SEMA3D	0.0303764	-0.43714	0.201899	0.012537	15		RASGRF1	0.0304128	-0.480073	0.221776	0.00970042	14		LIPG	0.0374438	0.642982	0.308993	0.00576858	8
	UBA7	0.0303967	0.337414	0.155858	0.0216845	26		C20orf195	0.0304975	-1.18309	0.546823	0.00159612	5		CLIC1	0.0374604	2.27441	1.09309	0.000477534	2
	VPS13D	0.0304114	0.21411	0.0989101	0.0512234	77		MT1F	0.0305493	-0.760586	0.351652	0.00473391	2		FSIP2	0.0374971	1.69908	0.816745	0.000660433	2
	PTPN21	0.0304372	-0.440836	0.20368	0.0126624	23		SEMG2	0.0305695	-0.423112	0.195647	0.0119181	17		KCNQ3	0.0375106	0.662123	0.318304	0.00465883	4
	C20orf195	0.0304975	-1.18309	0.546823	0.00159612	5		FRMD1	0.0306114	-0.349822	0.161798	0.0201419	28		WSCD2	0.0377398	0.873868	0.4206	0.00298519	6
	TRMT5	0.0305436	0.364477	0.168508	0.0155446	22		C1orf216	0.0306789	-0.718017	0.332229	0.00428832	8		GLO1	0.0378502	-1.9205	0.924887	0.000534875	3
	MT1F	0.0305493	-0.760586	0.351652	0.00473391	2		TSPAN2	0.0308611	0.646571	0.299497	0.00570792	6		ADAMTS7	0.0380281	-1.40271	0.67615	0.0012027	3
	NUP214	0.0305517	-0.292481	0.135229	0.0262726	44		NUP62	0.0309299	0.439113	0.203484	0.0118738	11		SDF2L1	0.0380473	1.05327	0.507761	0.00183468	2
	DMD	0.0305563	0.201141	0.093	0.0471041	54		ANGPT2	0.0309318	0.432704	0.200516	0.0109436	10		CEACAM5	0.0380706	3.62921	1.74978	0.000157723	3
	SEMG2	0.0305695	-0.423112	0.195647	0.0119181	17		MPZL2	0.0310078	-0.595052	0.275874	0.0066344	12		RNF111	0.0381029	0.702169	0.338599	0.00439751	11
	C1orf216	0.0306789	-0.718017	0.332229	0.00428832	8		LRWD1	0.03106	-0.380876	0.176634	0.0158805	15		PRDM2	0.0381065	0.802408	0.386944	0.00336579	13
	TBX19	0.0307414	0.966775	0.447497	0.00242363	9		ANKS6	0.0310624	0.339885	0.157626	0.0203162	24		TRIM22	0.038152	-0.475025	0.229124	0.00888541	5
	CCDC57	0.0308289	-0.365534	0.169286	0.0203657	22		C1orf201	0.0311014	-0.514428	0.238628	0.00986565	9		NARS	0.0381599	-0.594282	0.286659	0.00571898	7
	TSPAN2	0.0308611	0.646571	0.299497	0.00570792	6		MMP28	0.0311036	-0.475828	0.220725	0.0105642	13		FAM123B	0.0381756	1.31073	0.632296	0.00109734	6
	NUP62	0.0309299	0.439113	0.203484	0.0118738	11		PRKAG2	0.0311712	0.624164	0.289651	0.006559	7		TMEM63B	0.0381773	2.30016	1.10961	0.000392111	3
	ANGPT2	0.0309318	0.432704	0.200516	0.0109436	10		MFN2	0.0313157	0.523233	0.243021	0.00951665	10		LIMK1	0.0382469	-1.43942	0.694633	0.000984703	6
	MPZL2	0.0310078	-0.595052	0.275874	0.0066344	12		TMEM220	0.0313401	-0.469142	0.217929	0.00990331	6		TMEM44	0.0383309	-0.515171	0.248719	0.00807975	16
	LRWD1	0.03106	-0.380876	0.176634	0.0158805	15		OR4C16	0.0313596	-0.344685	0.160134	0.0190295	15		RNGTT	0.0383688	0.447234	0.215962	0.0099624	4
	ANKS6	0.0310624	0.339885	0.157626	0.0203162	24		CECR1	0.0313647	-0.560082	0.260211	0.00773618	16		LRCH3	0.0384234	-0.626646	0.302682	0.00522303	8
	C1orf201	0.0311014	-0.514428	0.238628	0.00986565	9		EIF2AK1	0.0313821	-0.432121	0.200782	0.0133106	18		ANKRD16	0.0384429	-0.790746	0.381984	0.00347502	5
	MMP28	0.0311036	-0.475828	0.220725	0.0105642	13		SLC22A18AS	0.0314751	-0.417656	0.194167	0.0135343	4		ITGA3	0.0384817	-0.511051	0.246922	0.00773738	10
	MFN2	0.0313157	0.523233	0.243021	0.00951665	10		FAT3	0.03149	0.164075	0.0762847	0.0762869	73		MPZL2	0.0385533	-0.586956	0.283701	0.00630724	9
	TMEM220	0.0313401	-0.469142	0.217929	0.00990331	6		CSN3	0.031521	-0.765466	0.355959	0.00384865	7		NDST1	0.0386891	0.729961	0.353068	0.00374809	6
	CECR1	0.0313647	-0.560082	0.260211	0.00773618	16		PDP2	0.0315296	-0.703876	0.327335	0.0043909	12		DHX8	0.0387265	0.732635	0.35443	0.0036732	10
	EIF2AK1	0.0313821	-0.432121	0.200782	0.0133106	18		ABCC1	0.031548	-0.324453	0.150902	0.0208165	37		PDE6A	0.0388187	-0.273434	0.132343	0.0299112	32
	SLC22A18AS	0.0314751	-0.417656	0.194167	0.0135343	4		IL34	0.0316186	-0.414399	0.192815	0.0147848	5		PPM1K	0.0388753	-0.75498	0.365518	0.00380519	4
	FAT3	0.03149	0.164075	0.0762847	0.0762869	73		KCNT2	0.0316916	-0.68829	0.320391	0.00473862	6		GLOD5	0.0390277	-0.336778	0.163176	0.0183199	4
	CSN3	0.031521	-0.765466	0.355959	0.00384865	7		RORC	0.0317228	0.431997	0.201127	0.0122081	10		MRGPRX2	0.0390526	-0.583883	0.282939	0.00580437	3
	PDP2	0.0315296	-0.703876	0.327335	0.0043909	12		GJB2	0.031747	0.40069	0.186577	0.0136514	18		ARNT	0.0390577	0.487232	0.23611	0.00836953	5
	IL34	0.0316186	-0.414399	0.192815	0.0147848	5		CCDC107	0.0319103	-2.14463	0.99958	0.000479021	4		CACNA2D2	0.0392554	1.49063	0.723079	0.00108242	6
	RORC	0.0317228	0.431997	0.201127	0.0122081	10		TRIM38	0.0319698	-0.226906	0.105794	0.0321488	9		NUP160	0.0392619	-0.723041	0.350747	0.00379262	15
	GJB2	0.031747	0.40069	0.186577	0.0136514	18		HTR6	0.0319998	-0.839591	0.391525	0.00318136	3		CLPSL1	0.0392776	3.1999	1.5524	0.000198622	2
	ABHD2	0.0318928	-0.515581	0.24028	0.0081085	7		SEPHS2	0.0320081	-0.621388	0.289785	0.00517882	5		WDFY3	0.0393215	-0.459114	0.222784	0.00946144	30
	PCSK9	0.0319062	-0.427196	0.199105	0.0130942	25		SYNRG	0.0320269	-0.323775	0.151009	0.0233493	25		ST6GALNAC5	0.0393295	-1.90565	0.924749	0.000545523	2
	CCDC107	0.0319103	-2.14463	0.99958	0.000479021	4		BICC1	0.0320636	0.291293	0.135889	0.0272842	22		DOK2	0.0394384	1.0938	0.531076	0.00185205	6
	GPRIN2	0.0319421	0.347234	0.16187	0.0204605	13		HOXD11	0.0321286	-2.12187	0.990227	0.0004674	2		SECTM1	0.0395404	-0.735889	0.357485	0.0040462	4
	TRIM38	0.0319698	-0.226906	0.105794	0.0321488	9		HTR4	0.0322802	0.373643	0.174524	0.0199039	11		MED18	0.0395495	1.30997	0.636396	0.00116262	7
	SEPHS2	0.0320081	-0.621388	0.289785	0.00517882	5		FAM170A	0.0323142	-0.577907	0.269987	0.00563965	10		VPS13C	0.0395856	-0.256826	0.124791	0.0332204	39
	SYNRG	0.0320269	-0.323775	0.151009	0.0233493	25		BAAT	0.0323257	-0.538719	0.251696	0.00869429	7		CCDC40	0.0396028	-0.313528	0.152356	0.0203295	21
	BICC1	0.0320636	0.291293	0.135889	0.0272842	22		MCTS1	0.0323829	0.599951	0.280396	0.00516577	2		XXYLT1	0.0397914	-0.530637	0.258103	0.00707076	9
	HOXD11	0.0321286	-2.12187	0.990227	0.0004674	2		CDKL5	0.0323875	0.516737	0.241512	0.00837578	5		UBA7	0.0398121	0.334315	0.162629	0.0200404	19
	PKDREJ	0.0322861	-0.249127	0.116368	0.0374802	49		AJUBA	0.0323993	-1.10428	0.516151	0.0017523	2		LRRC39	0.0399916	0.801942	0.390461	0.00338301	12
	FAM170A	0.0323142	-0.577907	0.269987	0.00563965	10		SMPD2	0.0324485	-0.793044	0.370782	0.00420728	10		UBAP2	0.0400178	0.478216	0.232871	0.00976023	23
	MCTS1	0.0323829	0.599951	0.280396	0.00516577	2		CCDC114	0.0324664	-0.305954	0.143061	0.0170184	20		ACSM3	0.0400187	-0.289301	0.140878	0.0256802	11
	CDKL5	0.0323875	0.516737	0.241512	0.00837578	5		OVCH1	0.0324791	-0.32567	0.152291	0.0229643	26		RPS6KA4	0.0402364	-0.610963	0.29784	0.00610776	8
	AJUBA	0.0323993	-1.10428	0.516151	0.0017523	2		MRPS24	0.0324798	-0.479658	0.224301	0.0104499	4		INTS1	0.040267	0.353517	0.172363	0.0169354	17
	CCDC114	0.0324664	-0.305954	0.143061	0.0170184	20		USP39	0.0325352	-1.12962	0.528412	0.00168489	5		LOC653486,SCGB1C1	0.0403433	-3.97903	1.94078	0.000122675	2
	GJB4	0.0324732	0.439473	0.205502	0.0114283	16		AP2A1	0.0325633	-1.15638	0.541017	0.00161659	5		AGPHD1	0.0404077	0.799729	0.390196	0.00320773	5
	OVCH1	0.0324791	-0.32567	0.152291	0.0229643	26		RTN1	0.0325809	-0.366143	0.171318	0.0190117	15		ADSSL1	0.0404592	0.560634	0.27361	0.00670497	11
	MRPS24	0.0324798	-0.479658	0.224301	0.0104499	4		PIK3R4	0.0326034	0.365481	0.171031	0.0163016	18		PARP10	0.0405279	1.174	0.57315	0.00156242	5
	FRMD1	0.0325257	-0.344279	0.161037	0.0203002	29		RAB27B	0.0326112	-1.92304	0.899948	0.00058416	3		CCDC85A	0.0406295	1.907	0.931474	0.000773029	4
	USP39	0.0325352	-1.12962	0.528412	0.00168489	5		TTC16	0.0327173	0.218879	0.102494	0.0454736	31		PPP2R2D	0.0406995	1.21993	0.596084	0.00131481	5
	AP2A1	0.0325633	-1.15638	0.541017	0.00161659	5		AMFR	0.0328116	1.2986	0.608418	0.00129983	6		CERS3	0.0408761	-2.14304	1.04805	0.000467708	4
	PIK3R4	0.0326034	0.365481	0.171031	0.0163016	18		C2orf80	0.0328567	-0.426305	0.199784	0.00872356	9		TBL3	0.0409528	0.721161	0.352817	0.00401299	9
	RAB27B	0.0326112	-1.92304	0.899948	0.00058416	3		KCNQ3	0.0330709	0.559817	0.262674	0.00689253	10		PDZD2	0.0410209	-0.302031	0.147814	0.0231691	33
	TTC16	0.0327173	0.218879	0.102494	0.0454736	31		MET	0.0330808	0.310355	0.145631	0.0229262	23		OR10X1	0.0411033	-0.272575	0.133453	0.0185276	11
	NTRK1	0.032835	0.392027	0.183697	0.016397	18		KIF5A	0.0331272	-0.728142	0.341764	0.0040884	5		ISOC2	0.0411918	1.2214	0.59826	0.00164717	3
	C2orf80	0.0328567	-0.426305	0.199784	0.00872356	9		SLC25A25	0.0332024	-0.461666	0.216782	0.0127486	7		PSMB11	0.041238	0.416688	0.204146	0.011424	16
	TLN2	0.0330759	0.245856	0.115363	0.0380408	56		ZNF660	0.0333903	-1.01926	0.479122	0.00205122	8		CNTNAP2	0.0412731	0.39063	0.191412	0.0134302	18
	MET	0.0330808	0.310355	0.145631	0.0229262	23		CIAO1	0.0334015	-0.691394	0.325022	0.00442738	10		TP53BP2	0.041295	-0.918486	0.450116	0.00243335	6
	KIF5A	0.0331272	-0.728142	0.341764	0.0040884	5		CEP85L	0.0334561	-0.383891	0.180521	0.0167713	15		FLT3	0.0413141	-0.583442	0.28595	0.00680677	6
	PROX2	0.0331774	-0.440117	0.206635	0.0128142	11		WFDC6	0.0334599	-1.78652	0.840116	0.000666017	3		ERICH1	0.0413588	-1.09932	0.538903	0.00197689	4
	SLC25A25	0.0332024	-0.461666	0.216782	0.0127486	7		IL1RL1	0.0335055	0.246579	0.115984	0.0292842	23		NELF	0.0414381	-0.676888	0.331951	0.00467945	3
	RHOBTB1	0.0332453	0.715686	0.336144	0.00421997	15		AGAP3	0.0335693	0.552914	0.260169	0.00780121	10		LSMD1	0.0415297	1.51197	0.741818	0.000859059	2
	ZNF621	0.0332948	1.09569	0.51477	0.0015413	9		TMEM168	0.0335805	-0.66384	0.312384	0.00503508	11		ATHL1	0.0417069	0.807128	0.396344	0.0029846	6
	ZNF660	0.0333903	-1.01926	0.479122	0.00205122	8		PURG	0.033586	-1.7038	0.801785	0.000727263	2		NPR3	0.0417113	-0.588338	0.288912	0.00560361	4
	CIAO1	0.0334015	-0.691394	0.325022	0.00442738	10		CYP24A1	0.0336567	-0.317628	0.149531	0.022418	20		NT5C3	0.0417683	1.19354	0.586267	0.00204606	2
	CEP85L	0.0334561	-0.383891	0.180521	0.0167713	15		STEAP1B	0.0336596	0.451058	0.21235	0.0119443	4		RTN1	0.0418734	-1.57312	0.773118	0.000813301	5
	WFDC6	0.0334599	-1.78652	0.840116	0.000666017	3		TMEM51	0.0337433	-1.05425	0.496554	0.00189808	8		CDH8	0.0418743	-0.4966	0.244057	0.0078198	7
	IL1RL1	0.0335055	0.246579	0.115984	0.0292842	23		C1QTNF2	0.0337885	1.24084	0.58459	0.00143599	6		DRD2	0.0419508	0.772775	0.379927	0.00317861	3
	AGAP3	0.0335693	0.552914	0.260169	0.00780121	10		AMZ2	0.0338018	0.685723	0.323084	0.00603223	7		ZFX	0.0421723	0.98427	0.484429	0.00203357	4
	TMEM168	0.0335805	-0.66384	0.312384	0.00503508	11		ATP6AP1	0.0338945	0.658281	0.310316	0.00451609	5		TIRAP	0.0422347	0.601983	0.296368	0.00541273	6
	PURG	0.033586	-1.7038	0.801785	0.000727263	2		C1orf130	0.0339673	0.886994	0.418303	0.00265811	3		TRAPPC12	0.0422846	-0.661571	0.325783	0.00443685	9
	CYP24A1	0.0336567	-0.317628	0.149531	0.022418	20		FLCN	0.0339967	0.559765	0.264026	0.00693791	12		TNNI1	0.0424019	-2.38591	1.17558	0.000333177	2
	STEAP1B	0.0336596	0.451058	0.21235	0.0119443	4		LZTFL1	0.0340286	-0.62317	0.293985	0.00693622	6		SLC36A1	0.0424574	0.922718	0.454763	0.0022691	7
	TMEM51	0.0337433	-1.05425	0.496554	0.00189808	8		GATA4	0.0340565	0.554975	0.261855	0.00798866	7		FBXO30	0.0424595	0.827296	0.407738	0.00278692	8
	C1QTNF2	0.0337885	1.24084	0.58459	0.00143599	6		LONRF2	0.0340751	0.414886	0.195776	0.0122198	9		ATM	0.042469	-0.292802	0.144316	0.0265521	37
	AMZ2	0.0338018	0.685723	0.323084	0.00603223	7		DBT	0.0341037	-0.60645	0.286218	0.00574597	8		TULP1	0.0425894	0.722128	0.356129	0.00389597	10
	ATP6AP1	0.0338945	0.658281	0.310316	0.00451609	5		DNA2	0.0341253	0.275983	0.130268	0.0306207	19		DLL3	0.0425907	0.834879	0.411737	0.00285364	5
	C1orf130	0.0339673	0.886994	0.418303	0.00265811	3		CYSLTR2	0.034166	-0.180653	0.0852898	0.0402397	17		SIRPB2	0.0426268	0.924513	0.456021	0.0026331	3
	FLCN	0.0339967	0.559765	0.264026	0.00693791	12		MTF2	0.0341955	-0.984895	0.465065	0.00221642	7		HMOX2	0.0427429	1.22483	0.604491	0.00134805	6
	LZTFL1	0.0340286	-0.62317	0.293985	0.00693622	6		IMMT	0.0342175	0.506901	0.239387	0.00827918	9		KCNU1	0.0427791	1.03089	0.508864	0.00182659	7
	GATA4	0.0340565	0.554975	0.261855	0.00798866	7		NOL9	0.0342718	0.987903	0.466683	0.00222859	8		PSD	0.0427899	0.725973	0.358372	0.0039269	9
	LONRF2	0.0340751	0.414886	0.195776	0.0122198	9		FOXRED2	0.0342726	0.266754	0.126015	0.0322908	22		GNS	0.0428915	0.863613	0.426525	0.00276459	2
	DBT	0.0341037	-0.60645	0.286218	0.00574597	8		AKAP10	0.034295	-0.530651	0.250711	0.00851087	8		RC3H1	0.0429652	-0.475612	0.234981	0.00914913	5
	DNA2	0.0341253	0.275983	0.130268	0.0306207	19		ZCCHC24	0.03432	1.66739	0.787881	0.000736288	3		EML6	0.0430706	0.463447	0.229086	0.00902914	12
	CYSLTR2	0.034166	-0.180653	0.0852898	0.0402397	17		TG	0.0343519	0.161763	0.0764506	0.0745252	104		LMO7	0.0432525	0.272736	0.134933	0.029386	21
	MTF2	0.0341955	-0.984895	0.465065	0.00221642	7		PLCL1	0.0343587	-0.481596	0.227615	0.00920516	12		KIF1C	0.0432884	-0.908409	0.449503	0.00235846	8
	IMMT	0.0342175	0.506901	0.239387	0.00827918	9		DNAJC21	0.0343724	-0.444942	0.210307	0.0109316	15		RBP2	0.0432974	3.66946	1.81582	0.000146082	2
	NOL9	0.0342718	0.987903	0.466683	0.00222859	8		SLC25A44	0.0344674	-1.47466	0.697384	0.00103144	2		QDPR	0.0434811	-2.90132	1.43697	0.000221981	2
	FOXRED2	0.0342726	0.266754	0.126015	0.0322908	22		ZSCAN30	0.0344961	0.545372	0.257954	0.00773206	8		ZNF408	0.0435582	1.31655	0.652301	0.00108686	2
	ZCCHC24	0.03432	1.66739	0.787881	0.000736288	3		IPO13	0.0344964	0.77259	0.365426	0.00367791	5		GAL3ST4	0.0435913	-0.388692	0.192613	0.0159513	10
	FBN2	0.0343251	0.185938	0.0878629	0.0635588	61		RBM15	0.0344983	-0.535932	0.253492	0.00832036	8		KRT15	0.0436586	0.757942	0.375711	0.00383681	16
	TG	0.0343519	0.161763	0.0764506	0.0745252	104		TERF2	0.0345182	-0.719979	0.340582	0.00410324	3		BMPER	0.0438348	0.342364	0.169851	0.0164489	13
	PLCL1	0.0343587	-0.481596	0.227615	0.00920516	12		PPP1R18	0.0345982	-0.368073	0.174192	0.0206289	14		TAAR5	0.0438551	0.343635	0.170498	0.0148457	10
	DNAJC21	0.0343724	-0.444942	0.210307	0.0109316	15		UBA7	0.03461	0.332749	0.157485	0.0212872	25		DNAJB8	0.0439035	2.13441	1.05925	0.0004985	6
	FSTL5	0.0344088	0.301071	0.142334	0.0251831	23		GCNT2	0.0346523	0.278851	0.132007	0.0287146	25		GPM6B	0.0439692	0.972563	0.482809	0.00189825	2
	SLC25A44	0.0344674	-1.47466	0.697384	0.00103144	2		DECR2	0.0347103	0.620096	0.293645	0.0062887	11		SREBF1	0.0439811	0.868361	0.431105	0.00301328	4
	ZSCAN30	0.0344961	0.545372	0.257954	0.00773206	8		ZNF75D	0.0347396	0.8591	0.40689	0.00246403	7		SLC5A9	0.044102	-0.320448	0.15918	0.0202546	18
	IPO13	0.0344964	0.77259	0.365426	0.00367791	5		CER1	0.0348274	1.44153	0.683072	0.00105386	5		EVI5	0.0441945	-0.485262	0.241155	0.00806996	10
	RBM15	0.0344983	-0.535932	0.253492	0.00832036	8		ZFHX3	0.0348571	0.17721	0.0839853	0.0770416	78		FASTKD2	0.0442564	-0.514842	0.25593	0.00759456	5
	TERF2	0.0345182	-0.719979	0.340582	0.00410324	3		FAM117A	0.0349141	-0.753511	0.357224	0.0039839	5		AMZ2	0.04452	1.84673	0.919157	0.000554952	2
	PPP1R18	0.0345982	-0.368073	0.174192	0.0206289	14		ICOSLG	0.0349927	0.566183	0.268531	0.00709587	11		SOAT1	0.0446288	-3.01104	1.49942	0.000204467	3
	DECR2	0.0347103	0.620096	0.293645	0.0062887	11		AADACL3	0.0351131	0.465263	0.220813	0.00891175	13		C9orf79	0.0446422	0.958829	0.477502	0.00266543	6
	ZNF75D	0.0347396	0.8591	0.40689	0.00246403	7		USP40	0.0351385	0.299374	0.142102	0.0223254	28		LRRC56	0.0447207	0.371788	0.185221	0.0141164	5
	CSF1R	0.0347798	-0.268874	0.127373	0.0331693	25		CSNK1E	0.0352053	2.76729	1.31401	0.000277588	2		SPTBN5	0.0447387	-0.301605	0.150269	0.0293331	24
	GALNTL4	0.0348113	-0.69001	0.326934	0.00461889	10		PLLP	0.035228	1.05212	0.499644	0.00197628	5		LRRCC1	0.0447722	0.323013	0.16096	0.0191218	19
	CER1	0.0348274	1.44153	0.683072	0.00105386	5		TBX19	0.0353264	0.961516	0.456865	0.00229811	8		SLC12A7	0.0448539	0.628968	0.31354	0.00494614	12
	FAM117A	0.0349141	-0.753511	0.357224	0.0039839	5		SVEP1	0.0353365	0.168378	0.0800093	0.0727689	64		FMR1	0.0448851	-1.60778	0.801592	0.00064142	3
	ICOSLG	0.0349927	0.566183	0.268531	0.00709587	11		NT5C3	0.0356318	1.16169	0.552895	0.00222159	4		TMEM174	0.0452774	-1.09852	0.548693	0.00172367	5
	AADACL3	0.0351131	0.465263	0.220813	0.00891175	13		RERG	0.0356666	-1.24977	0.59493	0.00134589	3		CCNH	0.0453117	1.00889	0.504006	0.00197776	4
	USP40	0.0351385	0.299374	0.142102	0.0223254	28		CCDC9	0.0357167	-0.662243	0.315333	0.0046104	8		DNAJB2	0.0453298	-1.68162	0.840147	0.000718517	2
	PISD	0.0351846	-0.50483	0.239685	0.00895404	15		IL4	0.0357309	4.12148	1.96263	0.000128535	3		RECQL5	0.0455013	-0.466887	0.233445	0.00915588	16
	CSNK1E	0.0352053	2.76729	1.31401	0.000277588	2		C15orf43	0.0357724	4.6836	2.23081	9.34686e-05	2		RTL1	0.0455019	0.478607	0.239305	0.0084588	3
	PLLP	0.035228	1.05212	0.499644	0.00197628	5		HSD17B8	0.0358	0.722848	0.344346	0.00545069	6		C9orf171	0.0455167	0.510623	0.255331	0.00751918	10
	PIAS3	0.0353215	0.68063	0.323393	0.00498224	12		TSC2	0.0358568	-0.246286	0.11736	0.0358898	52		FURIN	0.0455557	0.519482	0.259808	0.00714384	11
	NT5C3	0.0356318	1.16169	0.552895	0.00222159	4		C10orf90	0.0358918	0.361292	0.172195	0.0168716	21		KHDRBS2	0.0456115	-0.875615	0.438033	0.00283108	4
	OR4C16	0.035652	-0.335855	0.159864	0.0191055	16		SIGLEC15	0.0359486	2.72659	1.29992	0.000283903	2		TTK	0.0457336	-0.570876	0.285746	0.00645131	11
	RERG	0.0356666	-1.24977	0.59493	0.00134589	3		OR52I1	0.0359685	1.72836	0.824093	0.000718035	3		GMPR	0.0457343	0.821566	0.411228	0.00325983	7
	CCDC9	0.0357167	-0.662243	0.315333	0.0046104	8		CHD5	0.0360853	0.513237	0.244869	0.00816893	22		ZNF117	0.045739	1.17513	0.588212	0.00162138	3
	C15orf43	0.0357724	4.6836	2.23081	9.34686e-05	2		PHACTR4	0.0361104	0.536122	0.255822	0.00761106	16		MYOM1	0.0457573	0.284523	0.142431	0.0248309	25
	HSD17B8	0.0358	0.722848	0.344346	0.00545069	6		NOS1AP	0.036142	-0.603676	0.288106	0.00559215	4		VCAN	0.0458268	0.401761	0.201184	0.0123092	23
	C10orf90	0.0358918	0.361292	0.172195	0.0168716	21		REG1B	0.0361453	0.69951	0.333849	0.0041295	6		PABPN1L	0.045892	5.04418	2.52666	7.01013e-05	2
	SIGLEC15	0.0359486	2.72659	1.29992	0.000283903	2		GNS	0.0362559	0.835203	0.398847	0.00322573	5		PLCG1	0.0459304	-2.07108	1.0376	0.000414766	6
	OR52I1	0.0359685	1.72836	0.824093	0.000718035	3		C6orf170	0.0364571	0.272126	0.130092	0.0270959	33		KANSL1	0.0459554	-0.624099	0.312706	0.00595405	17
	BAAT	0.0359934	-0.525653	0.250669	0.00875271	8		WDR96	0.0366177	0.233491	0.111718	0.0399063	49		ISX	0.0459611	-0.670747	0.336088	0.00543156	5
	CHD5	0.0360853	0.513237	0.244869	0.00816893	22		MTERF	0.0366214	-0.402901	0.192779	0.013278	14		PI4K2A	0.0460378	-0.454938	0.228034	0.00908312	9
	PHACTR4	0.0361104	0.536122	0.255822	0.00761106	16		TMTC1	0.0366583	0.573073	0.274257	0.00625101	12		LMAN2	0.0460461	0.518124	0.259715	0.00815774	5
	REG1B	0.0361453	0.69951	0.333849	0.0041295	6		TTBK1	0.036714	0.473515	0.226678	0.00956502	10		XYLB	0.0460987	0.628992	0.315365	0.00574893	10
	GNS	0.0362559	0.835203	0.398847	0.00322573	5		SULT6B1	0.0367422	-0.493516	0.236289	0.00846889	6		CCR5	0.0461539	-0.697049	0.349576	0.00389531	6
	TRPM2	0.0363049	0.209356	0.100003	0.0458823	83		RCC1	0.0367603	-0.978445	0.468511	0.00223433	8		NKX2-8	0.0461985	-1.08276	0.543126	0.0018225	3
	MAP4K2	0.0364234	-0.512188	0.244812	0.00821325	11		C20orf111	0.0367822	-3.10359	1.48627	0.000218769	3		SMPD2	0.0462645	-0.808649	0.40575	0.00356112	4
	C6orf170	0.0364571	0.272126	0.130092	0.0270959	33		RBMX	0.0368016	3.56539	1.7076	0.000460972	3		CACNA2D1	0.0462649	-0.506631	0.254209	0.00740316	5
	MTERF	0.0366214	-0.402901	0.192779	0.013278	14		LACTB2	0.036804	2.25952	1.08218	0.000432431	3		PCDHGA6	0.0462889	-1.97362	0.990399	0.000566248	2
	NLRC3	0.0366231	-0.293088	0.140237	0.0282535	31		GLTP	0.0369115	-1.76431	0.845487	0.000675814	3		MCCC1	0.046404	0.618411	0.310494	0.0049249	15
	TMTC1	0.0366583	0.573073	0.274257	0.00625101	12		NTRK1	0.0369785	0.384896	0.184514	0.0162685	17		GPR161	0.0464741	-1.02713	0.51587	0.00174086	6
	SULT6B1	0.0367422	-0.493516	0.236289	0.00846889	6		APRT	0.0370654	1.02342	0.490839	0.00216369	5		C15orf26	0.0466307	-1.41347	0.710418	0.000922978	4
	RCC1	0.0367603	-0.978445	0.468511	0.00223433	8		TMEM171	0.0372096	0.680499	0.32662	0.00457913	13		CIAPIN1	0.0466493	-2.62375	1.31882	0.000325532	5
	C20orf111	0.0367822	-3.10359	1.48627	0.000218769	3		PPYR1	0.0372863	0.405785	0.194844	0.0130707	19		CYP7A1	0.0467119	0.597247	0.30029	0.00652591	5
	RBMX	0.0368016	3.56539	1.7076	0.000460972	3		RAD21L1	0.0373434	-0.512809	0.246307	0.00792556	6		KIF11	0.0467773	-1.63809	0.823859	0.000832651	4
	LACTB2	0.036804	2.25952	1.08218	0.000432431	3		CAPRIN2	0.0374558	0.360224	0.173121	0.0165802	15		ZNF37A	0.0468201	-0.831138	0.418093	0.00293569	3
	GLTP	0.0369115	-1.76431	0.845487	0.000675814	3		TSPAN9	0.0374615	2.54599	1.22362	0.00032007	4		TPTE	0.0468819	1.0864	0.546656	0.00177967	4
	APRT	0.0370654	1.02342	0.490839	0.00216369	5		ARHGAP27	0.0374638	0.868038	0.417191	0.00315415	6		SPRED1	0.0469594	3.30763	1.66492	0.000175319	2
	TMEM171	0.0372096	0.680499	0.32662	0.00457913	13		HS6ST2	0.0374745	-0.532596	0.255987	0.00631132	3		CDC42BPA	0.0469973	0.805414	0.40548	0.0029701	10
	PPYR1	0.0372863	0.405785	0.194844	0.0130707	19		OR4D5	0.037481	-0.476908	0.229229	0.0101416	15		FAM65B	0.0470211	-0.318101	0.160163	0.019442	8
	RAD21L1	0.0373434	-0.512809	0.246307	0.00792556	6		SIGLEC9	0.0375188	-0.329863	0.158582	0.0193801	10		NPEPL1	0.0470558	-0.745601	0.375467	0.00333106	4
	ARHGAP27	0.0374638	0.868038	0.417191	0.00315415	6		NLRC3	0.0376156	-0.291589	0.140253	0.0282477	30		PLCL1	0.047058	-0.811906	0.408861	0.00281727	4
	HS6ST2	0.0374745	-0.532596	0.255987	0.00631132	3		GRIP2	0.0376918	-0.41934	0.201781	0.0118337	23		ACAA2	0.0471527	0.82068	0.413456	0.0027378	6
	OR4D5	0.037481	-0.476908	0.229229	0.0101416	15		OR10X1	0.0378344	-0.258949	0.124696	0.0224527	17		CATSPER3	0.0479349	-0.391012	0.197686	0.0120198	9
	SIGLEC9	0.0375188	-0.329863	0.158582	0.0193801	10		UMODL1	0.0378384	-0.201275	0.0969253	0.0539624	57		ACSBG1	0.0479566	-0.803367	0.406202	0.00291295	5
	GRIP2	0.0376918	-0.41934	0.201781	0.0118337	23		GLO1	0.0378502	-1.9205	0.924887	0.000534875	3		TMPRSS11D	0.0480432	1.26438	0.639548	0.00113074	3
	OR10X1	0.0378344	-0.258949	0.124696	0.0224527	17		TARS2	0.0379706	-0.395341	0.19051	0.0129469	13		OTOP3	0.0483154	-0.43916	0.222406	0.00977075	13
	UMODL1	0.0378384	-0.201275	0.0969253	0.0539624	57		OR8H1	0.0380498	0.850531	0.410029	0.00298509	6		KIF18A	0.0486356	2.7396	1.38941	0.000221989	3
	GLO1	0.0378502	-1.9205	0.924887	0.000534875	3		AMPD3	0.0380993	-0.241073	0.116248	0.0291562	23		RIOK1	0.0487501	-0.443864	0.225223	0.00925952	7
	TARS2	0.0379706	-0.395341	0.19051	0.0129469	13		UBAP2L	0.0381981	-0.882214	0.425631	0.00352797	7		LZTS2	0.0487739	0.639974	0.324767	0.00452473	7
	OR8H1	0.0380498	0.850531	0.410029	0.00298509	6		SAMD1	0.0382096	2.7277	1.31608	0.000280736	3		LSM14B	0.0488237	-1.65011	0.837564	0.000673683	2
	AMPD3	0.0380993	-0.241073	0.116248	0.0291562	23		GPR82	0.0382339	1.19561	0.576936	0.00152487	3		GARS	0.048914	0.56682	0.287822	0.00565173	6
	UBAP2L	0.0381981	-0.882214	0.425631	0.00352797	7		GCC1	0.0382357	0.295803	0.14274	0.0174539	14		GTF3A	0.048935	0.655402	0.332834	0.00461769	4
	SAMD1	0.0382096	2.7277	1.31608	0.000280736	3		PIK3IP1	0.038267	-0.678948	0.32768	0.00499311	5		UTRN	0.0489479	-0.2765	0.140423	0.0247738	35
	GPR82	0.0382339	1.19561	0.576936	0.00152487	3		NDUFC2	0.0382911	1.83556	0.886007	0.00060178	2		SSBP2	0.0490765	0.866354	0.440237	0.00243496	3
	GCC1	0.0382357	0.295803	0.14274	0.0174539	14		FAM149B1	0.0382948	-1.42302	0.686891	0.00108193	4		COL6A5	0.0490871	-0.237542	0.120712	0.0351442	15
	PIK3IP1	0.038267	-0.678948	0.32768	0.00499311	5		MICAL2	0.0383048	-0.20665	0.099755	0.0406639	38		THSD7B	0.049133	0.398429	0.202512	0.0140406	14
	NDUFC2	0.0382911	1.83556	0.886007	0.00060178	2		HSD17B1	0.0383676	-0.901615	0.435372	0.00250152	5		MTX2	0.0491734	-0.868047	0.441286	0.00251168	4
	FAM149B1	0.0382948	-1.42302	0.686891	0.00108193	4		GPR111	0.0384145	-0.373117	0.180215	0.0156156	12		CFHR2	0.0493206	-2.50995	1.2768	0.000292182	2
	GPR111	0.0384145	-0.373117	0.180215	0.0156156	12		HIST1H2AK	0.0384207	-4.32908	2.091	0.000113049	2		CRAMP1L	0.049323	0.424019	0.215699	0.0119804	7
	HIST1H2AK	0.0384207	-4.32908	2.091	0.000113049	2		DHX8	0.0384335	0.564424	0.272642	0.00651825	13		ATP5J2	0.0493562	0.897357	0.456553	0.00224942	2
	EIF4ENIF1	0.0384581	-0.385124	0.186056	0.0136598	14		EIF4ENIF1	0.0384581	-0.385124	0.186056	0.0136598	14		ECHDC2	0.0493737	0.505505	0.257209	0.00734619	8
	TEPP	0.0386111	-0.829469	0.401037	0.00290379	5		TEPP	0.0386111	-0.829469	0.401037	0.00290379	5		GPNMB	0.049456	-0.431791	0.219781	0.00981186	11
	PRSS3	0.0386635	0.8405	0.406481	0.0030487	6		PRSS3	0.0386635	0.8405	0.406481	0.0030487	6		PRPF38A	0.0494681	-3.53188	1.79782	0.000170494	3
	PLAC8	0.0386941	0.920897	0.445432	0.00245377	2		ARRDC2	0.0386807	0.493029	0.238459	0.00846698	8		SIX2	0.0495539	1.58236	0.805766	0.000860974	3
	DLL3	0.0387872	0.590941	0.285971	0.00622996	9		PLAC8	0.0386941	0.920897	0.445432	0.00245377	2		REM2	0.049665	-0.986681	0.502681	0.00198351	6
	RGS3	0.038798	-0.40753	0.197225	0.0150515	31		DLL3	0.0387872	0.590941	0.285971	0.00622996	9		GPR20	0.0496709	-2.16616	1.10361	0.000397992	3
	HSD17B1	0.0388047	-0.89841	0.434802	0.00250736	6		RGS3	0.038798	-0.40753	0.197225	0.0150515	31		TAS2R5	0.0497304	-0.584745	0.297993	0.00530544	4
	BIN3	0.0388358	0.729104	0.352919	0.00372273	4		BIN3	0.0388358	0.729104	0.352919	0.00372273	4		VASH1	0.0497901	-0.868173	0.442547	0.00265831	3
	MOGAT1	0.0388689	0.489735	0.237094	0.00804183	15		MOGAT1	0.0388689	0.489735	0.237094	0.00804183	15		APCDD1L	0.0498123	-0.526076	0.268191	0.00664302	12
	NHLRC2	0.0390432	0.503735	0.244089	0.00682479	15		GPRIN2	0.0389771	0.342276	0.165797	0.0192107	12		CTDP1	0.049821	-1.11897	0.570467	0.00145486	8
	C2orf88	0.0391327	1.70734	0.827683	0.000694124	3		C2orf88	0.0391327	1.70734	0.827683	0.000694124	3		CATSPER4	0.0499934	1.22659	0.625806	0.0017066	4
	DHX8	0.0392556	0.55843	0.270885	0.00660589	14		UBAP2	0.0391332	0.380573	0.184495	0.0149883	35
	IRF2BP1	0.0392582	-1.91714	0.929985	0.000585077	3		IRF2BP1	0.0392582	-1.91714	0.929985	0.000585077	3
	CLPSL1	0.0392776	3.1999	1.5524	0.000198622	2		CLPSL1	0.0392776	3.1999	1.5524	0.000198622	2
	SLC47A1	0.0392913	-0.348277	0.168975	0.0170083	14		SLC47A1	0.0392913	-0.348277	0.168975	0.0170083	14
	CDCA4	0.0393137	0.550873	0.267299	0.00801861	2		CDCA4	0.0393137	0.550873	0.267299	0.00801861	2
	A2ML1	0.0393209	-0.159932	0.0776063	0.075308	56		ST6GALNAC5	0.0393295	-1.90565	0.924749	0.000545523	2
	TPM1	0.039321	0.673793	0.326955	0.00316939	6		TOP2B	0.0393424	-0.426386	0.206925	0.01229	15
	ST6GALNAC5	0.0393295	-1.90565	0.924749	0.000545523	2		AARS2	0.0393616	0.200761	0.0974385	0.0428822	32
	TOP2B	0.0393424	-0.426386	0.206925	0.01229	15		APOBR	0.0394197	0.360013	0.174783	0.0183988	20
	AARS2	0.0393616	0.200761	0.0974385	0.0428822	32		HELQ	0.0395126	-0.198303	0.0963194	0.0427643	28
	ABCB10	0.0394149	0.8382	0.406927	0.00292689	8		MRPL45	0.0395488	1.07635	0.522899	0.00197792	11
	MRPL45	0.0395488	1.07635	0.522899	0.00197792	11		MED18	0.0395495	1.30997	0.636396	0.00116262	7
	MED18	0.0395495	1.30997	0.636396	0.00116262	7		OR51S1	0.0395711	0.380953	0.185091	0.0138799	9
	OR51S1	0.0395711	0.380953	0.185091	0.0138799	9		MYO16	0.0395964	-0.315209	0.153168	0.0216926	32
	MYO16	0.0395964	-0.315209	0.153168	0.0216926	32		MOGS	0.0396153	-0.29951	0.145553	0.0257054	12
	MOGS	0.0396153	-0.29951	0.145553	0.0257054	12		C6orf163	0.0398044	-0.619385	0.30129	0.00531599	3
	EML4	0.0396375	-0.744164	0.361682	0.00325206	16		AKR1B15	0.0398456	-0.906059	0.440831	0.00246819	7
	KIF15	0.0396834	0.154184	0.0749548	0.0637056	38		PLBD1	0.0400315	-0.460903	0.224456	0.0093287	7
	C6orf163	0.0398044	-0.619385	0.30129	0.00531599	3		SLC25A27	0.040124	-0.860264	0.419136	0.00303394	7
	AKR1B15	0.0398456	-0.906059	0.440831	0.00246819	7		SLC27A5	0.0401307	-0.341218	0.166253	0.019161	10
	SETD3	0.0398676	0.493877	0.240316	0.00649991	13		OR10W1	0.0401453	0.411933	0.200722	0.011667	6
	PLBD1	0.0400315	-0.460903	0.224456	0.0093287	7		ODZ4	0.0402362	-0.191002	0.093112	0.0453174	48
	SLC27A5	0.0401307	-0.341218	0.166253	0.019161	10		RPS6KA4	0.0402364	-0.610963	0.29784	0.00610776	8
	OR10W1	0.0401453	0.411933	0.200722	0.011667	6		C7orf72	0.0402688	-0.494491	0.2411	0.00828003	4
	RPS6KA4	0.0402364	-0.610963	0.29784	0.00610776	8		TAS2R16	0.0404184	-0.85007	0.41478	0.00243841	9
	C7orf72	0.0402688	-0.494491	0.2411	0.00828003	4		EML6	0.040423	0.355385	0.173409	0.014645	19
	TAS2R16	0.0404184	-0.85007	0.41478	0.00243841	9		PDE6A	0.0405443	-0.259241	0.126572	0.0325963	39
	CCDC85A	0.0406295	1.907	0.931474	0.000773029	4		CCDC85A	0.0406295	1.907	0.931474	0.000773029	4
	ZFAT	0.0406763	-0.268236	0.13105	0.0295192	29		INSC	0.0407452	-0.279664	0.136681	0.026242	26
	MICAL2	0.0407439	-0.203987	0.0996943	0.0407026	39		MAMSTR	0.040761	0.599983	0.293254	0.00605671	4
	INSC	0.0407452	-0.279664	0.136681	0.026242	26		SLC11A2	0.0408044	-0.453599	0.221753	0.00994573	8
	MAMSTR	0.040761	0.599983	0.293254	0.00605671	4		PLEKHA4	0.0408425	0.44519	0.217684	0.0104042	22
	PLEKHA4	0.0408425	0.44519	0.217684	0.0104042	22		GTPBP8	0.0408653	0.718301	0.351266	0.00396414	5
	GTPBP8	0.0408653	0.718301	0.351266	0.00396414	5		FLG2	0.0409202	-0.220217	0.107721	0.0393948	52
	RNASE2	0.0409318	-0.788459	0.385701	0.00352862	4		RNASE2	0.0409318	-0.788459	0.385701	0.00352862	4
	ITGA1	0.0411424	-0.373595	0.182947	0.0143859	18		ITGA1	0.0411424	-0.373595	0.182947	0.0143859	18
	LRCH3	0.0411546	-0.432144	0.211631	0.00987357	20		ACSS2	0.0412567	0.399725	0.195853	0.0150518	17
	HEMGN	0.0413329	-0.970408	0.475649	0.00205266	10		LILRB1	0.0413112	1.54966	0.759492	0.000836672	9
	DEPDC7	0.0413532	0.620815	0.304326	0.00519821	9		HEMGN	0.0413329	-0.970408	0.475649	0.00205266	10
	OR9G1,OR9G9	0.0414117	-0.712302	0.349273	0.00386768	5		DEPDC7	0.0413532	0.620815	0.304326	0.00519821	9
	PTPRN	0.0414981	0.661584	0.324542	0.00469214	17		OR9G1,OR9G9	0.0414117	-0.712302	0.349273	0.00386768	5
	MUC1	0.0415251	-0.436753	0.214279	0.0109735	11		PTPRG	0.0414183	-0.356421	0.174775	0.0168091	32
	CD36	0.0417233	0.406153	0.199459	0.0138645	28		PTPRN	0.0414981	0.661584	0.324542	0.00469214	17
	EVI5	0.0417795	-0.465729	0.22878	0.00891163	14		MUC1	0.0415251	-0.436753	0.214279	0.0109735	11
	KIF14	0.0418034	-0.227093	0.111568	0.0407956	38		CCDC136	0.041601	0.221416	0.108671	0.0405936	25
	WASF1	0.0418339	-0.665892	0.327193	0.00450207	7		NPR3	0.0417113	-0.588338	0.288912	0.00560361	4
	GLI4	0.041892	0.58299	0.286539	0.00546114	8		CD36	0.0417233	0.406153	0.199459	0.0138645	28
	FLG2	0.0418962	-0.21844	0.107365	0.0395467	53		AAGAB	0.0417593	-0.476303	0.233951	0.00898026	9
	IFT20	0.0419315	1.94775	0.957502	0.000560632	3		EVI5	0.0417795	-0.465729	0.22878	0.00891163	14
	C10orf35	0.041933	0.66988	0.329311	0.00446637	8		ASXL3	0.0417989	-0.286601	0.1408	0.023408	30
	DRD2	0.0419508	0.772775	0.379927	0.00317861	3		KIF14	0.0418034	-0.227093	0.111568	0.0407956	38
	CAPRIN2	0.0419813	0.289103	0.142156	0.0197697	16		SMC6	0.0418091	0.789744	0.388002	0.00311486	6
	FMR1	0.0420303	-0.415181	0.204199	0.0122407	6		WASF1	0.0418339	-0.665892	0.327193	0.00450207	7
	CLCA1	0.0420977	-0.352964	0.173655	0.0144355	18		IFT20	0.0419315	1.94775	0.957502	0.000560632	3
	GCNT4	0.0421723	-0.646313	0.318096	0.00463812	7		DRD2	0.0419508	0.772775	0.379927	0.00317861	3
	TSC2	0.0421891	-0.235531	0.115931	0.0369883	54		FMR1	0.0420303	-0.415181	0.204199	0.0122407	6
	TIMD4	0.0422666	-0.289257	0.142429	0.0184996	20		CLCA1	0.0420977	-0.352964	0.173655	0.0144355	18
	TNNI1	0.0424019	-2.38591	1.17558	0.000333177	2		GCNT4	0.0421723	-0.646313	0.318096	0.00463812	7
	CCR5	0.0424821	-0.425808	0.209885	0.0110154	13		TNNI1	0.0424019	-2.38591	1.17558	0.000333177	2
	PPCDC	0.0425087	1.41003	0.695108	0.00104481	5		CCR5	0.0424821	-0.425808	0.209885	0.0110154	13
	KCNJ5	0.0426314	-1.2741	0.628469	0.00124518	4		PPCDC	0.0425087	1.41003	0.695108	0.00104481	5
	C19orf55	0.0426324	-0.535434	0.264113	0.00717615	5		CYB5D2	0.0426288	0.879305	0.433726	0.00241918	9
	FAM102A	0.0426371	0.90094	0.444415	0.00236271	4		KCNJ5	0.0426314	-1.2741	0.628469	0.00124518	4
	HSD11B2	0.0426632	-0.984763	0.485825	0.00196316	4		C19orf55	0.0426324	-0.535434	0.264113	0.00717615	5
	PPFIA2	0.0426959	-0.378967	0.18699	0.0138112	11		FAM102A	0.0426371	0.90094	0.444415	0.00236271	4
	CCIN	0.0427781	0.61284	0.302507	0.00519696	16		HSD11B2	0.0426632	-0.984763	0.485825	0.00196316	4
	XXYLT1	0.0427852	-0.509002	0.25126	0.00762212	11		NHLRC2	0.0427381	0.495632	0.244604	0.00680434	14
	KCTD3	0.0428293	0.319287	0.157644	0.0138092	7		CCIN	0.0427781	0.61284	0.302507	0.00519696	16
	EXTL2	0.0429307	-0.901457	0.4453	0.00241795	9		XXYLT1	0.0427852	-0.509002	0.25126	0.00762212	11
	KIF3C	0.0430202	0.89375	0.441682	0.00247192	8		EHBP1L1	0.0428393	-0.380734	0.187991	0.014962	19
	KLK15	0.0430222	-0.347526	0.171745	0.0156896	9		EXTL2	0.0429307	-0.901457	0.4453	0.00241795	9
	KIAA1609	0.0430703	0.204813	0.101241	0.0494972	37		C9orf174	0.0430127	-0.172549	0.085269	0.0505188	38
	NLRP6	0.0430886	-0.373642	0.184711	0.0151731	14		KIF3C	0.0430202	0.89375	0.441682	0.00247192	8
	DLGAP5	0.0431171	-0.367658	0.181777	0.016684	18		KLK15	0.0430222	-0.347526	0.171745	0.0156896	9
	PTPLAD2	0.0432082	-0.551775	0.272928	0.00622948	3		KIAA1609	0.0430703	0.204813	0.101241	0.0494972	37
	GJA1	0.0432171	-1.31887	0.652386	0.00108104	3		NLRP6	0.0430886	-0.373642	0.184711	0.0151731	14
	IPO11	0.0432501	-0.440936	0.218146	0.0136863	14		DLGAP5	0.0431171	-0.367658	0.181777	0.016684	18
	PCDHA11	0.0432571	-0.756775	0.374415	0.00382519	10		PTPLAD2	0.0432082	-0.551775	0.272928	0.00622948	3
	RTBDN	0.04331	-0.499889	0.247383	0.0076143	7		PCDHA11	0.0432571	-0.756775	0.374415	0.00382519	10
	BACE2	0.0433324	0.752283	0.372327	0.00547391	3		RTBDN	0.04331	-0.499889	0.247383	0.0076143	7
	C1QA	0.0434617	0.616697	0.30541	0.00497369	7		BACE2	0.0433324	0.752283	0.372327	0.00547391	3
	CCL4	0.0434809	-1.84132	0.911967	0.000565805	2		C1QA	0.0434617	0.616697	0.30541	0.00497369	7
	SMARCA2	0.0434832	0.592771	0.293591	0.00574071	12		SESN1	0.0434894	1.0412	0.515707	0.00185768	7
	SESN1	0.0434894	1.0412	0.515707	0.00185768	7		SENP8	0.0435237	1.73509	0.859528	0.0006309	3
	SENP8	0.0435237	1.73509	0.859528	0.0006309	3		TRAF1	0.0435769	0.849116	0.420743	0.0029462	6
	TRAF1	0.0435769	0.849116	0.420743	0.0029462	6		GPANK1	0.0436495	0.614379	0.304534	0.00620133	5
	USO1	0.0436585	0.284788	0.141169	0.0252199	21		USO1	0.0436585	0.284788	0.141169	0.0252199	21
	ANGPTL1	0.0436617	-0.867133	0.429843	0.00254986	8		ANGPTL1	0.0436617	-0.867133	0.429843	0.00254986	8
	TLR4	0.0436845	0.349278	0.173158	0.0164802	23		TLR4	0.0436845	0.349278	0.173158	0.0164802	23
	RET	0.0438373	0.452573	0.22453	0.0104371	17		TMEM116	0.0438155	-0.883934	0.438491	0.00254321	3
	TMEM116	0.0439019	-0.863043	0.428304	0.00267172	4		RET	0.0438373	0.452573	0.22453	0.0104371	17
	REM2	0.0439476	-0.968311	0.480649	0.00215324	8		REM2	0.0439476	-0.968311	0.480649	0.00215324	8
	ZNF273	0.0439728	1.664	0.826075	0.000695616	3		ZNF273	0.0439728	1.664	0.826075	0.000695616	3
	WSB1	0.0440829	-1.02375	0.508491	0.00194436	7		IPO11	0.0440754	-0.456997	0.226981	0.0133497	13
	MMP14	0.0441907	-0.718504	0.35706	0.00416264	10		WSB1	0.0440829	-1.02375	0.508491	0.00194436	7
	MRPL12	0.0442238	0.472773	0.234981	0.00836963	2		MMP14	0.0441907	-0.718504	0.35706	0.00416264	10
	HIST1H2BM	0.0443241	1.98653	0.987824	0.000504148	4		MRPL12	0.0442238	0.472773	0.234981	0.00836963	2
	DLEC1	0.0445388	0.140267	0.06982	0.0779795	62		HIST1H2BM	0.0443241	1.98653	0.987824	0.000504148	4
	LPA	0.0445968	-0.224863	0.111959	0.0391514	37		CASP1	0.0446957	-0.600363	0.299059	0.00541872	9
	UBR4	0.0447901	0.24622	0.122704	0.0298227	69		ZNF836	0.0447945	0.922782	0.459878	0.00222756	6
	ZNF836	0.0447945	0.922782	0.459878	0.00222756	6		RGS4	0.0450116	-1.91382	0.954741	0.000530487	2
	SLC5A6	0.0448676	-0.472406	0.235509	0.00865902	16		PCDHA3	0.0450198	-1.14491	0.571177	0.00159099	4
	RGS4	0.0450116	-1.91382	0.954741	0.000530487	2		GRM5	0.0451025	0.502215	0.250644	0.00820757	5
	GRM5	0.0451025	0.502215	0.250644	0.00820757	5		FCF1	0.0451365	0.701535	0.350176	0.00397932	3
	FCF1	0.0451365	0.701535	0.350176	0.00397932	3		TMEM2	0.0451729	-0.419818	0.209591	0.0101836	22
	SCN2B	0.0451938	3.10101	1.5483	0.00020542	3		SCN2B	0.0451938	3.10101	1.5483	0.00020542	3
	PAQR5	0.045234	0.693499	0.346321	0.00410359	4		PAQR5	0.045234	0.693499	0.346321	0.00410359	4
	ZFHX3	0.0453811	0.16662	0.083264	0.0781647	85		ACAA2	0.0453873	0.824896	0.412232	0.00275533	7
	ACAA2	0.0453873	0.824896	0.412232	0.00275533	7		LRRC3	0.0454818	0.444161	0.222061	0.0112038	6
	LRRC3	0.0454818	0.444161	0.222061	0.0112038	6		LRRC39	0.0456288	0.694672	0.347543	0.00406462	15
	FBXL21	0.0456241	0.388802	0.194512	0.0140754	16		LY6K	0.0457034	0.907178	0.454015	0.00214529	9
	LY6K	0.0457034	0.907178	0.454015	0.00214529	9		ING1	0.0458356	-0.555435	0.278148	0.00837678	8
	SLC25A27	0.0458258	-0.83534	0.418299	0.00304563	8		SLC5A6	0.0458388	-0.500821	0.250803	0.00758763	14
	ING1	0.0458356	-0.555435	0.278148	0.00837678	8		KIAA1524	0.0458891	-0.287224	0.14387	0.0290437	24
	ABCC1	0.0458819	-0.29795	0.149238	0.021286	40		FBXL21	0.0459506	0.388317	0.194563	0.0140685	15
	UBAP2	0.0459084	0.366594	0.183643	0.0151285	36		RAB36	0.0460462	-0.480788	0.241	0.00586883	11
	RAB36	0.0460462	-0.480788	0.241	0.00586883	11		BMP5	0.0460683	0.430977	0.216054	0.0124268	8
	BMP5	0.0460683	0.430977	0.216054	0.0124268	8		GPR143	0.0460869	0.600448	0.301037	0.00468288	9
	GPR143	0.0460869	0.600448	0.301037	0.00468288	9		OR2W5	0.0460962	0.310796	0.155826	0.016258	12
	OR2W5	0.0460962	0.310796	0.155826	0.016258	12		PRDX2	0.0461345	-1.49977	0.752079	0.000823822	4
	PRDX2	0.0461345	-1.49977	0.752079	0.000823822	4		COG4	0.0462959	-0.462652	0.232175	0.0107185	15
	WDR59	0.0462817	0.324866	0.163018	0.0195309	24		SNAPC4	0.0463268	0.288738	0.144919	0.0229632	34
	COG4	0.0462959	-0.462652	0.232175	0.0107185	15		ADAM28	0.0463928	-0.155869	0.0782554	0.0380221	31
	ZNF541	0.04632	-0.567614	0.28488	0.00619422	4		NDUFS8	0.0464457	-0.774791	0.389084	0.00310338	5
	PRKAG2	0.046358	0.557737	0.279971	0.00694462	8		CAMTA1	0.0465468	-0.342407	0.172029	0.0163479	35
	ADAM28	0.0463928	-0.155869	0.0782554	0.0380221	31		XKR5	0.0465564	-0.258777	0.130018	0.0288241	17
	NDUFS8	0.0464457	-0.774791	0.389084	0.00310338	5		A2ML1	0.0465625	-0.154985	0.0778719	0.0745739	55
	CAMTA1	0.0465468	-0.342407	0.172029	0.0163479	35		ATP13A1	0.0465835	0.317777	0.159681	0.0195191	15
	ATP13A1	0.0465835	0.317777	0.159681	0.0195191	15		WDR6	0.0465982	-0.361595	0.181712	0.0148528	24
	WDR6	0.0465982	-0.361595	0.181712	0.0148528	24		DAP	0.0466028	0.862893	0.433638	0.00248387	3
	DAP	0.0466028	0.862893	0.433638	0.00248387	3		LYRM1	0.0466465	-0.57845	0.290752	0.00563107	8
	LYRM1	0.0466465	-0.57845	0.290752	0.00563107	8		CLTCL1	0.0466572	-0.136393	0.0685598	0.0599324	49
	NCKAP1L	0.0467463	0.421768	0.212094	0.0104855	17		ARHGAP11A	0.0467082	-0.438292	0.220365	0.00895979	19
	NFATC3	0.0468192	-0.374474	0.188374	0.0132261	21		NCKAP1L	0.0467463	0.421768	0.212094	0.0104855	17
	ECHDC3	0.0468369	-0.709494	0.356929	0.00407942	13		NFATC3	0.0468192	-0.374474	0.188374	0.0132261	21
	TTC14	0.0468521	0.360897	0.181571	0.0160717	18		ECHDC3	0.0468369	-0.709494	0.356929	0.00407942	13
	TMTC3	0.046894	-0.413623	0.208137	0.0121691	10		TTC14	0.0468521	0.360897	0.181571	0.0160717	18
	SCNN1D	0.0468988	-0.288541	0.145199	0.0240556	27		PCDHGA1	0.0468527	-0.531791	0.267551	0.00753564	9
	ECSIT	0.0469662	-0.788987	0.397153	0.00305327	11		TMTC3	0.046894	-0.413623	0.208137	0.0121691	10
	AMFR	0.0469806	1.16613	0.587036	0.00140305	7		ECSIT	0.0469662	-0.788987	0.397153	0.00305327	11
	AGTR1	0.0470688	-0.563632	0.283848	0.00608718	5		LSMD1	0.0469873	1.30201	0.655459	0.00109273	3
	C2orf18	0.0471482	0.788313	0.397142	0.00311143	4		AGTR1	0.0470688	-0.563632	0.283848	0.00608718	5
	PLK3	0.0471622	0.719393	0.362444	0.00371149	10		C2orf18	0.0471482	0.788313	0.397142	0.00311143	4
	PPAT	0.0471976	1.99314	1.00434	0.000501479	3		PLK3	0.0471622	0.719393	0.362444	0.00371149	10
	CLTCL1	0.0474264	-0.135887	0.0685443	0.0599908	50		RTP1	0.0471678	-0.75534	0.380564	0.0032337	6
	CX3CR1	0.0475852	-0.315618	0.159318	0.0194115	13		PLCB1	0.0472386	0.318546	0.160545	0.0190751	17
	ZSCAN2	0.0476296	-0.447317	0.225843	0.00916843	12		USP32	0.0478267	-0.550902	0.278387	0.00617757	14
	USP32	0.0478267	-0.550902	0.278387	0.00617757	14		DCDC5	0.0479861	-0.252447	0.12766	0.027651	20
	DCDC5	0.0479861	-0.252447	0.12766	0.027651	20		MAGEA10	0.0479883	0.570162	0.288329	0.00591901	4
	MAGEA10	0.0479883	0.570162	0.288329	0.00591901	4		LIMK1	0.0479985	-1.21874	0.61634	0.0012882	7
	LIMK1	0.0479985	-1.21874	0.61634	0.0012882	7		ZNF117	0.048005	1.1087	0.560706	0.00177233	4
	ZNF117	0.048005	1.1087	0.560706	0.00177233	4		FANK1	0.0480111	-0.257617	0.130289	0.01871	14
	FANK1	0.0480111	-0.257617	0.130289	0.01871	14		ZACN	0.0480474	0.346015	0.175025	0.0158009	25
	ZACN	0.0480474	0.346015	0.175025	0.0158009	25		SKIV2L	0.0481437	0.612783	0.310097	0.0061498	17
	SKIV2L	0.0481437	0.612783	0.310097	0.0061498	17		CERS5	0.0482448	0.468735	0.237309	0.00828889	13
	CERS5	0.0482448	0.468735	0.237309	0.00828889	13		GLT1D1	0.0482919	0.433796	0.219667	0.0103189	4
	GLT1D1	0.0482919	0.433796	0.219667	0.0103189	4		TMEM99	0.0483204	-0.781779	0.39593	0.00313063	5
	TMEM99	0.0483204	-0.781779	0.39593	0.00313063	5		SORCS2	0.0483795	0.253127	0.128229	0.0306284	23
	FAM159A	0.0484	0.683866	0.346465	0.00410974	6		FAM159A	0.0484	0.683866	0.346465	0.00410974	6
	HELQ	0.0484096	-0.183198	0.0928171	0.0471792	30		SOGA2	0.0485484	-0.243882	0.123639	0.0292333	49
	CYB5D2	0.0484408	0.83069	0.420927	0.00257107	10		MUL1	0.0485848	0.660186	0.334743	0.00434336	6
	SOGA2	0.0485484	-0.243882	0.123639	0.0292333	49		SATB1	0.0486336	-0.836218	0.424091	0.00265167	3
	MUL1	0.0485848	0.660186	0.334743	0.00434336	6		ZNF318	0.0488064	0.308711	0.156684	0.0208832	27
	APOBR	0.0486308	0.343236	0.174071	0.0185741	21		DOK2	0.0488364	0.545552	0.276927	0.00650599	12
	SATB1	0.0486336	-0.836218	0.424091	0.00265167	3		C19orf21	0.0488962	0.287818	0.146138	0.0240825	29
	DENND4A	0.0486393	-0.383091	0.194291	0.0120367	14		FLAD1	0.0489271	0.668527	0.339487	0.00432537	17
	TMEM2	0.0486952	-0.40722	0.20658	0.0104991	23		SLC9B2	0.0489365	-0.368962	0.187372	0.0128718	18
	ZNF318	0.0488064	0.308711	0.156684	0.0208832	27		TNFRSF17	0.0489432	-0.752224	0.382017	0.00353446	9
	IL28RA	0.0488243	-0.479525	0.243399	0.00761862	11		PCDHAC1	0.048978	-0.155885	0.0791782	0.0291534	23
	ADCK3	0.0488269	0.527989	0.268001	0.00657763	23		RAD54L2	0.0490361	0.445055	0.226114	0.00924098	20
	TKTL2	0.0488788	0.424506	0.215524	0.00748622	17		SSBP2	0.0490765	0.866354	0.440237	0.00243496	3
	C19orf21	0.0488962	0.287818	0.146138	0.0240825	29		FOS	0.0490817	-0.74536	0.378763	0.00335073	3
	FLAD1	0.0489271	0.668527	0.339487	0.00432537	17		RASSF8	0.0490998	-0.70507	0.358317	0.00373977	8
	SLC9B2	0.0489365	-0.368962	0.187372	0.0128718	18		CYP4Z1	0.0491433	-0.636594	0.32358	0.0047104	4
	TNFRSF17	0.0489432	-0.752224	0.382017	0.00353446	9		MTX2	0.0491734	-0.868047	0.441286	0.00251168	4
	PCDHAC1	0.048978	-0.155885	0.0791782	0.0291534	23		XYLT2	0.0492127	0.476577	0.242318	0.00930554	11
	RAD54L2	0.0490361	0.445055	0.226114	0.00924098	20		KDM4A	0.0492479	-0.341018	0.173419	0.0152575	14
	SSBP2	0.0490765	0.866354	0.440237	0.00243496	3		TEX30	0.0492616	1.69082	0.859888	0.000946299	3
	FOS	0.0490817	-0.74536	0.378763	0.00335073	3		TMEM14E	0.0492766	1.12244	0.570868	0.00139617	4
	RASSF8	0.0490998	-0.70507	0.358317	0.00373977	8		ATP5J2	0.0493562	0.897357	0.456553	0.00224942	2
	CYP4Z1	0.0491433	-0.636594	0.32358	0.0047104	4		HSPB6	0.0493689	-1.28381	0.653207	0.00110528	4
	MTX2	0.0491734	-0.868047	0.441286	0.00251168	4		ARMCX1	0.0493743	-2.53577	1.29024	0.000253669	2
	XYLT2	0.0492127	0.476577	0.242318	0.00930554	11		NKRF	0.0493886	1.27181	0.647158	0.00105221	4
	TAF2	0.0492215	-0.503518	0.256026	0.00792106	10		ZNF800	0.0494946	0.6243	0.317822	0.00456722	8
	KDM4A	0.0492479	-0.341018	0.173419	0.0152575	14		SIX2	0.0495539	1.58236	0.805766	0.000860974	3
	TEX30	0.0492616	1.69082	0.859888	0.000946299	3		CHD2	0.0496629	-0.527016	0.268495	0.00656663	9
	TMEM14E	0.0492766	1.12244	0.570868	0.00139617	4		SFXN3	0.0496711	-0.398934	0.203249	0.012566	6
	ATP5J2	0.0493562	0.897357	0.456553	0.00224942	2		TIE1	0.0497031	-0.392678	0.20009	0.0120369	26
	HSPB6	0.0493689	-1.28381	0.653207	0.00110528	4		PISD	0.0497214	-0.493819	0.251646	0.00807187	13
	ARMCX1	0.0493743	-2.53577	1.29024	0.000253669	2		EFEMP2	0.0497236	0.804888	0.410169	0.0028783	9
	BSG	0.0493837	0.946927	0.481832	0.00230737	11		GRIN2A	0.0497531	0.301177	0.153499	0.0210135	19
	NKRF	0.0493886	1.27181	0.647158	0.00105221	4		VASH1	0.0497901	-0.868173	0.442547	0.00265831	3
	KIAA1524	0.0494545	-0.281939	0.143506	0.0291781	25		RNF113B	0.0498178	0.787176	0.401308	0.00327897	8
	ZNF800	0.0494946	0.6243	0.317822	0.00456722	8		FOSB	0.0498225	-0.958426	0.488623	0.00205648	4
	SIX2	0.0495539	1.58236	0.805766	0.000860974	3
	CHD2	0.0496629	-0.527016	0.268495	0.00656663	9
	SFXN3	0.0496711	-0.398934	0.203249	0.012566	6
	GRIN2A	0.0497531	0.301177	0.153499	0.0210135	19
	VASH1	0.0497901	-0.868173	0.442547	0.00265831	3
	RNF113B	0.0498178	0.787176	0.401308	0.00327897	8
	FOSB	0.0498225	-0.958426	0.488623	0.00205648	4
	PDE6A	0.049921	-0.24635	0.125648	0.0329644	40
	KCNT2	0.0499915	-0.593857	0.302983	0.00512065	10

## Sheet: 6. ADAMTS6 variant details
	Table S6: ADAMTS6 variant details
	EA + AA meta-analysis ADAMTS6 single variant details												Variant included in specific SKAT test (TRUE/FALSE)		Variant consequences
	SKATgene	Name	SNP	Position	Allele 1	Allele 2	beta	se	maf	caf	p	ntotal	sc_nonsynSplice_included	sc_damaging_included	Allele	Transcript	Entrez gene	cdna_pos	cds_pos	aa_pos	aa_change
	ADAMTS6	exm457407	rs149664000	64466548	G	A	-2.31063	1.26799	0.000333092	0.999667	0.0684132	85593	TRUE	TRUE	G|A	NM_197941	11174	3954	3140	1047	S>F
	ADAMTS6	exm457411	rs74464814	64468684	C	T	2.71917	2.58009	6.42576e-05	0.999936	0.291926	85593	TRUE	TRUE	C|T	NM_197941	11174	3876	3062	1021	R>H
	ADAMTS6	exm457437	rs149141130	64511194	G	A	0.752074	0.774197	0.000788679	0.999211	0.331337	85593	TRUE	TRUE	G|A	NM_197941	11174	3207	2393	798	S>F
	ADAMTS6	exm457438	rs146495868	64511219	T	C	1.20946	1.14093	0.000350496	0.99965	0.289116	85593	TRUE	TRUE	T|C	NM_197941	11174	3182	2368	790	K>E
	ADAMTS6	exm457442	rs77712043	64520165	T	C	-0.800199	0.343797	0.00442793	0.995572	0.0199368	85593	TRUE	FALSE	T|C	NM_197941	11174	3068	2254	752	M>V
	ADAMTS6	exm457461	rs139885103	64538001	C	G	-2.63217	2.52267	7.50664e-05	0.999925	0.296759	79976	TRUE	TRUE	C|G	NM_197941	11174	2677	1863	621	E>D
	ADAMTS6	exm457462	rs114007286	64556450	G	A	-1.66527	0.529813	0.00209577	0.997904	0.00167152	73657	TRUE	TRUE	G|A	NM_197941	11174	2621	1807	603	R>W
	ADAMTS6	exm457463	rs201962159	64556473	T	C	1.90126	2.18911	0.000109156	0.999891	0.385116	73657	TRUE	TRUE	T|C	NM_197941	11174	2598	1784	595	K>R
	ADAMTS6	exm457495	rs143380335	64748587	C	G	-0.223718	1.80602	0.000150045	0.99985	0.901416	79976	TRUE	TRUE	C|G	NM_197941	11174	1604	790	264	G>R
	ADAMTS6	exm457504	rs145952163	64755999	G	A	0.165495	1.40897	0.000344124	0.999656	0.906498	65390	TRUE	FALSE	G|A	NM_197941	11174	1443	629	210	S>L
	ADAMTS6	exm457507	rs139864360	64756144	C	A	1.2568	0.683415	0.00114705	0.998853	0.0659152	79830	TRUE	TRUE	C|A	NM_197941	11174	1298	484	162	D>Y
	ADAMTS6	exm457509	rs141587320	64756164	T	C	1.02899	0.423596	0.00258233	0.997418	0.0151333	85593	TRUE	TRUE	T|C	NM_197941	11174	1278	464	155	H>R
	ADAMTS6	exm457514	rs139129344	64766763	G	C	2.64138	2.02425	0.000159185	0.999841	0.191938	59773	TRUE	TRUE	G|C	NM_197941	11174	1118	304	102	L>V
	ADAMTS6	exm457516	rs61736454	64766798	G	A	2.54979	0.509643	0.00180549	0.998195	5.64167e-07	85593	TRUE	TRUE	G|A	NM_197941	11174	1083	269	90	S>L

## Sheet: 7. ADAMTS6 mut mice phenotype
	Table S7: Cardiac phenotype distribution in Adamts6 mutant mice.
	Structural Congenital Heart Defects	Outflow Tract Defects	Valvular Defects	Outflow Tract + Valvular Defects	Hypertrophy
	36	33	16	13	18
	(88%)	(80%)	(39%)	(32%)	(44%)
	Cardiac Outflow Tract Defects:
	DORV	Overriding Aorta	PTA	PA Hypoplasia
	19	11	3	3
	(46%)	(27%)	(7%)	(7%)
	Valvular Defects:
	Thickened AV Valves	Atrioventricular Septal Defects	Thickened Semilunar Valves	Bicuspid Aortic Valve	Aortic Valve Stenosis
	1	15	3	1	1
	(2%)	(36%)	(8%)	(2%)	(2%)
